# Supplementary material for: Transcriptome Differences in Porcine Alveolar Macrophages from Tongcheng and Large White Pigs in Response to Highly Pathogenic Porcine Reproductive and Respiratory Syndrome Virus (PRRSV) Infection
Source: MDPI journal article supplement (doi:10.3390/ijms18071475), 2017-07-12
Supplement: s1 [file s1]

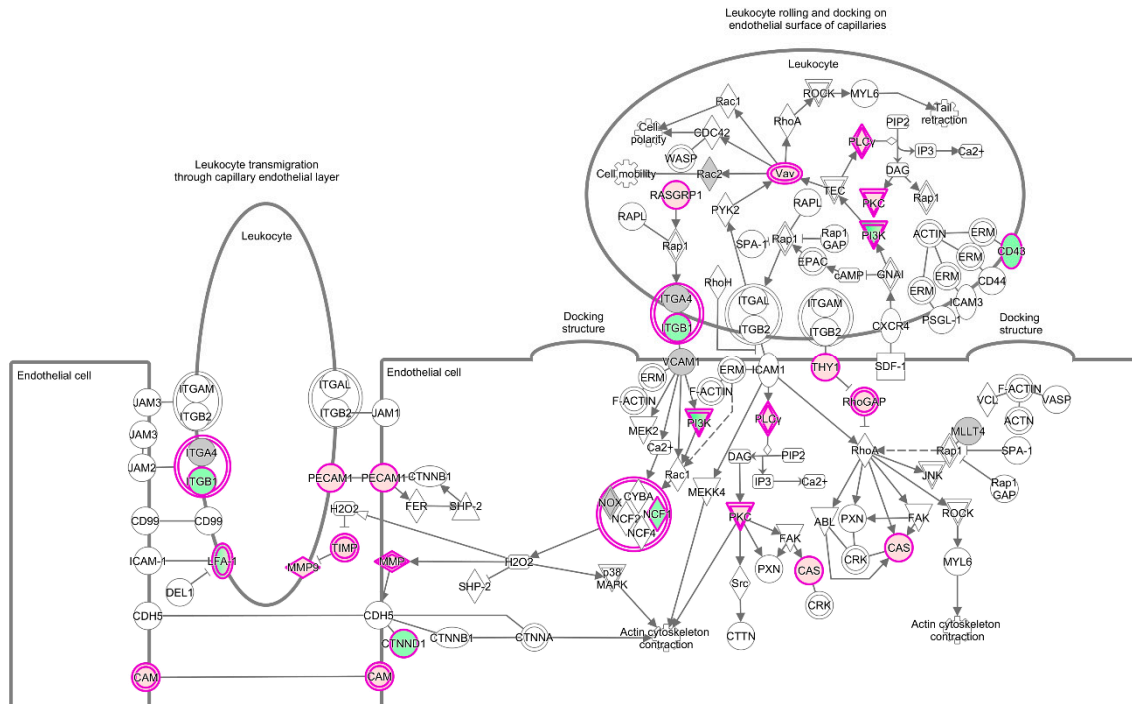

**Figure S1.** Leukocyte extravasation signaling of TC pigs. The DEGs enriched in this pathway were marked with fuchsia frame, upregulated genes were filled with pink and downregulated genes were filled with green.

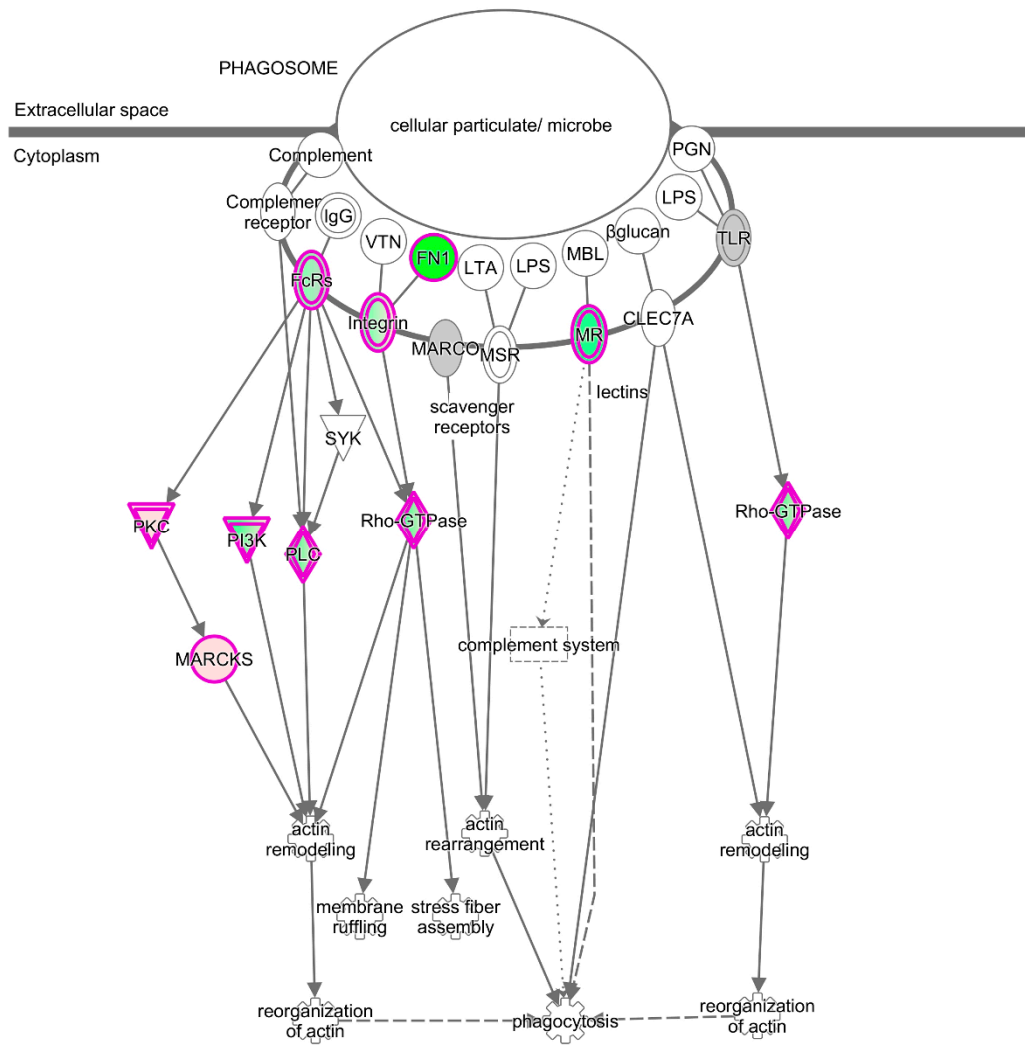

**Figure S2.** Phagosome formation signaling of TC pigs. The DEGs enriched in this pathway were marked with fuchsia frame, upregulated genes were filled with pink and downregulated genes were filled with green.

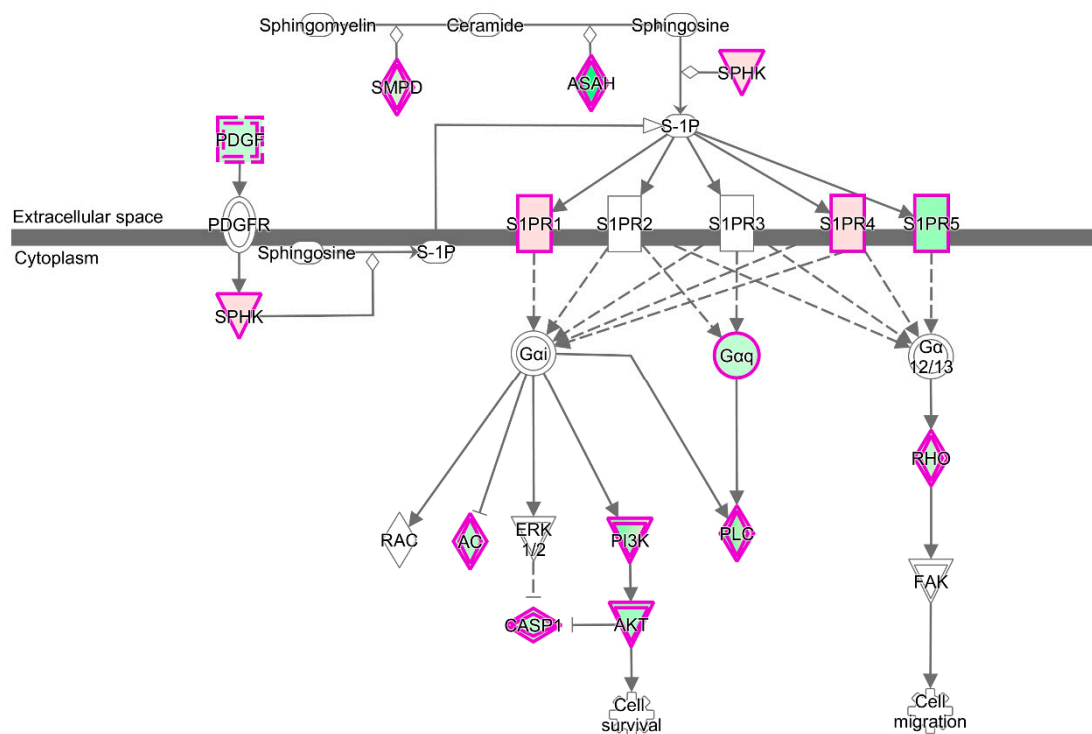

**Figure S3.** Sphingosine-1-phosphate Signaling. The DEGs enriched in this pathway were marked with fuchsia frame, upregulated genes were filled with pink and downregulated genes were filled with green.

**Table S1.** The specific GO enrichments of TC and LW pigs. The sheet “common” showed the specific genes in the common enriched terms between TC and LW pigs, the sheet “TC\_Specific” and “LW\_Specific” showed the specific GO terms enriched in TC and LW pigs.

**Table S2.** The KEGG pathway enrichment of all DEGs of TC and LW pigs.

**Table S3.** The DAVID enrichment of the common DEGs of TC\_INF\_CON, LW\_INF\_CON, D2D0, and D6D2.
