# Supplementary material for: Transcriptome Differences in Porcine Alveolar Macrophages from Tongcheng and Large White Pigs in Response to Highly Pathogenic Porcine Reproductive and Respiratory Syndrome Virus (PRRSV) Infection
Source: Int J Mol Sci. 2017 Jul 12;18(7):1475. doi: 10.3390/ijms18071475 (PMC5535966; doi:10.3390/ijms18071475)
Supplement: Supplementary file 1 [file ijms-18-01475-s001.zip]

Archive with 4 entries (4 files):
- Table S3.xlsx
- ijms201160-supplementary.pdf
- Table S1.xlsx
- Table S2.xlsx
