# Supplementary material for: Transcriptome Differences in Porcine Alveolar Macrophages from Tongcheng and Large White Pigs in Response to Highly Pathogenic Porcine Reproductive and Respiratory Syndrome Virus (PRRSV) Infection
Source: Int J Mol Sci. 2017 Jul 12;18(7):1475. doi: 10.3390/ijms18071475 (PMC5535966; doi:10.3390/ijms18071475)
Supplement: Supplementary file 1 [file ijms-18-01475-s001.zip › Table S1.xlsx]

## Sheet: common
Category	num	name	breed	Count	Genes
GOTERM_BP_FAT	GO:0006955	immune response	common	58	ENSG00000196352	ENSG00000196083	ENSG00000186827	ENSG00000183918	ENSG00000172116	ENSG00000170458	ENSG00000169248	ENSG00000169245	ENSG00000168685	ENSG00000162894	ENSG00000161921	ENSG00000160791	ENSG00000160703	ENSG00000158517	ENSG00000156234	ENSG00000153563	ENSG00000153162	ENSG00000152207	ENSG00000145649	ENSG00000143669	ENSG00000141293	ENSG00000139193	ENSG00000137959	ENSG00000137834	ENSG00000137078	ENSG00000134954	ENSG00000134321	ENSG00000134061	ENSG00000133661	ENSG00000126759	ENSG00000126353	ENSG00000125910	ENSG00000125730	ENSG00000122224	ENSG00000121858	ENSG00000120885	ENSG00000120217	ENSG00000117560	ENSG00000115604	ENSG00000115085	ENSG00000112715	ENSG00000111335	ENSG00000110777	ENSG00000109743	ENSG00000108771
GOTERM_BP_FAT	GO:0006955	immune response	LW	32	ENSG00000197594	ENSG00000188822	ENSG00000172673	ENSG00000169508	ENSG00000165240	ENSG00000165168	ENSG00000164136	ENSG00000163519	ENSG00000158477	ENSG00000158473	ENSG00000154451	ENSG00000149534	ENSG00000144648	ENSG00000137801	ENSG00000137496	ENSG00000136634	ENSG00000133063	ENSG00000132170	ENSG00000130529	ENSG00000125657	ENSG00000123838	ENSG00000116514	ENSG00000115607	ENSG00000115009	ENSG00000113318	ENSG00000109943	ENSG00000107779	ENSG00000101916	ENSG00000077238	ENSG00000075223	ENSG00000069399	ENSG00000064932
GOTERM_BP_FAT	GO:0006955	immune response	TC	12	ENSG00000204252	ENSG00000198183	ENSG00000197471	ENSG00000171791	ENSG00000163599	ENSG00000158869	ENSG00000150782	ENSG00000148516	ENSG00000145824	ENSG00000111537	ENSG00000102962	ENSG00000095585
GOTERM_BP_FAT	GO:0006952	defense response	common	45	ENSG00000213402	ENSG00000204305	ENSG00000196352	ENSG00000196083	ENSG00000186827	ENSG00000185507	ENSG00000183918	ENSG00000181104	ENSG00000180644	ENSG00000175040	ENSG00000170458	ENSG00000169248	ENSG00000169245	ENSG00000163563	ENSG00000163220	ENSG00000162894	ENSG00000161921	ENSG00000160791	ENSG00000160703	ENSG00000158517	ENSG00000157601	ENSG00000156234	ENSG00000153162	ENSG00000143669	ENSG00000136250	ENSG00000134321	ENSG00000134061	ENSG00000133661	ENSG00000131203	ENSG00000126759	ENSG00000126353	ENSG00000125730	ENSG00000120885	ENSG00000118785	ENSG00000115604	ENSG00000115523	ENSG00000115414	ENSG00000108771	ENSG00000108700	ENSG00000108691	ENSG00000102970	ENSG00000101347	ENSG00000069974	ENSG00000026751	ENSG00000000938
GOTERM_BP_FAT	GO:0006952	defense response	LW	28	ENSG00000196639	ENSG00000188822	ENSG00000173198	ENSG00000165168	ENSG00000164136	ENSG00000163519	ENSG00000158473	ENSG00000149534	ENSG00000137801	ENSG00000136634	ENSG00000132170	ENSG00000123838	ENSG00000123609	ENSG00000120915	ENSG00000117215	ENSG00000115607	ENSG00000115170	ENSG00000115009	ENSG00000107798	ENSG00000104783	ENSG00000101916	ENSG00000089041	ENSG00000075651	ENSG00000074416	ENSG00000069399	ENSG00000056736	ENSG00000012779	ENSG00000010327
GOTERM_BP_FAT	GO:0006952	defense response	TC	13	ENSG00000198183	ENSG00000197471	ENSG00000173578	ENSG00000171791	ENSG00000163435	ENSG00000150093	ENSG00000133116	ENSG00000121933	ENSG00000111537	ENSG00000102962	ENSG00000095585	ENSG00000090382	ENSG00000072274
GOTERM_BP_FAT	GO:0006954	inflammatory response	common	26	ENSG00000204305	ENSG00000196352	ENSG00000196083	ENSG00000186827	ENSG00000185507	ENSG00000181104	ENSG00000175040	ENSG00000170458	ENSG00000169248	ENSG00000169245	ENSG00000163220	ENSG00000160791	ENSG00000156234	ENSG00000153162	ENSG00000136250	ENSG00000134061	ENSG00000131203	ENSG00000126759	ENSG00000126353	ENSG00000125730	ENSG00000120885	ENSG00000118785	ENSG00000115414	ENSG00000108700	ENSG00000108691	ENSG00000102970
GOTERM_BP_FAT	GO:0006954	inflammatory response	LW	21	ENSG00000196639	ENSG00000188822	ENSG00000173198	ENSG00000165168	ENSG00000164136	ENSG00000149534	ENSG00000137801	ENSG00000136634	ENSG00000123838	ENSG00000123609	ENSG00000120915	ENSG00000117215	ENSG00000115607	ENSG00000115170	ENSG00000115009	ENSG00000107798	ENSG00000101916	ENSG00000089041	ENSG00000074416	ENSG00000012779	ENSG00000010327
GOTERM_BP_FAT	GO:0006954	inflammatory response	TC	8	ENSG00000173578	ENSG00000163435	ENSG00000133116	ENSG00000121933	ENSG00000102962	ENSG00000095585	ENSG00000090382	ENSG00000072274
GOTERM_BP_FAT	GO:0009611	response to wounding	common	36	ENSG00000204305	ENSG00000198682	ENSG00000196352	ENSG00000196083	ENSG00000186827	ENSG00000185507	ENSG00000181104	ENSG00000175040	ENSG00000170458	ENSG00000169860	ENSG00000169248	ENSG00000169245	ENSG00000164733	ENSG00000163220	ENSG00000160791	ENSG00000156234	ENSG00000153162	ENSG00000136250	ENSG00000134061	ENSG00000131203	ENSG00000126759	ENSG00000126353	ENSG00000125730	ENSG00000120885	ENSG00000118785	ENSG00000115414	ENSG00000110436	ENSG00000108700	ENSG00000108691	ENSG00000102970	ENSG00000085063	ENSG00000079215	ENSG00000074695	ENSG00000073060	ENSG00000069974	ENSG00000038427
GOTERM_BP_FAT	GO:0009611	response to wounding	LW	27	ENSG00000196639	ENSG00000188822	ENSG00000173198	ENSG00000165168	ENSG00000164136	ENSG00000149534	ENSG00000137801	ENSG00000136854	ENSG00000136634	ENSG00000123838	ENSG00000123609	ENSG00000122863	ENSG00000120915	ENSG00000117215	ENSG00000115884	ENSG00000115607	ENSG00000115170	ENSG00000115009	ENSG00000110492	ENSG00000107798	ENSG00000105825	ENSG00000101916	ENSG00000089041	ENSG00000074416	ENSG00000051382	ENSG00000012779	ENSG00000010327
GOTERM_BP_FAT	GO:0009611	response to wounding	TC	11	ENSG00000173578	ENSG00000171791	ENSG00000163435	ENSG00000140416	ENSG00000133116	ENSG00000121933	ENSG00000102962	ENSG00000095585	ENSG00000090382	ENSG00000072274	ENSG00000010278
GOTERM_BP_FAT	GO:0002684	positive regulation of immune system process	common	23	ENSG00000198851	ENSG00000198821	ENSG00000196352	ENSG00000186827	ENSG00000183918	ENSG00000182866	ENSG00000168685	ENSG00000165272	ENSG00000154096	ENSG00000150637	ENSG00000141293	ENSG00000139193	ENSG00000134242	ENSG00000131203	ENSG00000126759	ENSG00000125730	ENSG00000120885	ENSG00000116824	ENSG00000115085	ENSG00000112715	ENSG00000110448	ENSG00000073861	ENSG00000004468
GOTERM_BP_FAT	GO:0002684	positive regulation of immune system process	LW	14	ENSG00000172673	ENSG00000164136	ENSG00000163519	ENSG00000162692	ENSG00000158473	ENSG00000149534	ENSG00000137801	ENSG00000130202	ENSG00000123838	ENSG00000109943	ENSG00000101916	ENSG00000100906	ENSG00000089041	ENSG00000077238
GOTERM_BP_FAT	GO:0002684	positive regulation of immune system process	TC	5	ENSG00000197471	ENSG00000158869	ENSG00000150782	ENSG00000111537	ENSG00000090376
GOTERM_BP_FAT	GO:0046649	lymphocyte activation	common	18	ENSG00000198851	ENSG00000196684	ENSG00000186827	ENSG00000182866	ENSG00000172116	ENSG00000168685	ENSG00000167984	ENSG00000167286	ENSG00000160654	ENSG00000153563	ENSG00000134242	ENSG00000117090	ENSG00000116824	ENSG00000115085	ENSG00000106348	ENSG00000103522	ENSG00000069974	ENSG00000026751
GOTERM_BP_FAT	GO:0046649	lymphocyte activation	LW	13	ENSG00000172673	ENSG00000169508	ENSG00000165240	ENSG00000164136	ENSG00000162692	ENSG00000158473	ENSG00000136634	ENSG00000125347	ENSG00000120738	ENSG00000115232	ENSG00000109943	ENSG00000089041	ENSG00000069399
GOTERM_BP_FAT	GO:0046649	lymphocyte activation	TC	4	ENSG00000197471	ENSG00000171791	ENSG00000150093	ENSG00000095585
GOTERM_BP_FAT	GO:0043067	regulation of programmed cell death	common	48	ENSG00000204209	ENSG00000198959	ENSG00000198851	ENSG00000198355	ENSG00000196730	ENSG00000188906	ENSG00000187098	ENSG00000186891	ENSG00000186827	ENSG00000182866	ENSG00000181104	ENSG00000171310	ENSG00000164733	ENSG00000163947	ENSG00000162894	ENSG00000160654	ENSG00000158006	ENSG00000157601	ENSG00000156299	ENSG00000154229	ENSG00000143669	ENSG00000141682	ENSG00000139193	ENSG00000137834	ENSG00000137193	ENSG00000134954	ENSG00000134243	ENSG00000132694	ENSG00000131203	ENSG00000121858	ENSG00000120885	ENSG00000117560	ENSG00000116824	ENSG00000116478	ENSG00000112715	ENSG00000110448	ENSG00000108691	ENSG00000100985	ENSG00000091436	ENSG00000089486	ENSG00000081189	ENSG00000070669	ENSG00000069974	ENSG00000044574	ENSG00000042286
GOTERM_BP_FAT	GO:0043067	regulation of programmed cell death	LW	32	ENSG00000196975	ENSG00000188215	ENSG00000187288	ENSG00000182871	ENSG00000181284	ENSG00000181026	ENSG00000179222	ENSG00000166598	ENSG00000165240	ENSG00000159388	ENSG00000158234	ENSG00000155792	ENSG00000151929	ENSG00000137801	ENSG00000136634	ENSG00000135587	ENSG00000133639	ENSG00000130203	ENSG00000129473	ENSG00000124767	ENSG00000120833	ENSG00000118503	ENSG00000115170	ENSG00000113734	ENSG00000109943	ENSG00000105141	ENSG00000103490	ENSG00000100906	ENSG00000089820	ENSG00000089041	ENSG00000069399	ENSG00000023445
GOTERM_BP_FAT	GO:0043067	regulation of programmed cell death	TC	18	ENSG00000197471	ENSG00000171791	ENSG00000171552	ENSG00000167772	ENSG00000166289	ENSG00000163545	ENSG00000160293	ENSG00000146192	ENSG00000142405	ENSG00000141582	ENSG00000127863	ENSG00000115425	ENSG00000115129	ENSG00000111537	ENSG00000111057	ENSG00000102096	ENSG00000067606	ENSG00000049249
GOTERM_BP_FAT	GO:0042110	T cell activation	common	14	ENSG00000198851	ENSG00000196684	ENSG00000186827	ENSG00000182866	ENSG00000172116	ENSG00000168685	ENSG00000167984	ENSG00000167286	ENSG00000160654	ENSG00000153563	ENSG00000134242	ENSG00000116824	ENSG00000115085	ENSG00000069974
GOTERM_BP_FAT	GO:0042110	T cell activation	LW	9	ENSG00000172673	ENSG00000165240	ENSG00000164136	ENSG00000158473	ENSG00000125347	ENSG00000120738	ENSG00000109943	ENSG00000089041	ENSG00000069399
GOTERM_BP_FAT	GO:0042110	T cell activation	TC	2	ENSG00000197471	ENSG00000171791
GOTERM_BP_FAT	GO:0010941	regulation of cell death	common	48	ENSG00000204209	ENSG00000198959	ENSG00000198851	ENSG00000198355	ENSG00000196730	ENSG00000188906	ENSG00000187098	ENSG00000186891	ENSG00000186827	ENSG00000182866	ENSG00000181104	ENSG00000171310	ENSG00000164733	ENSG00000163947	ENSG00000162894	ENSG00000160654	ENSG00000158006	ENSG00000157601	ENSG00000156299	ENSG00000154229	ENSG00000143669	ENSG00000141682	ENSG00000139193	ENSG00000137834	ENSG00000137193	ENSG00000134954	ENSG00000134243	ENSG00000132694	ENSG00000131203	ENSG00000121858	ENSG00000120885	ENSG00000117560	ENSG00000116824	ENSG00000116478	ENSG00000112715	ENSG00000110448	ENSG00000108691	ENSG00000100985	ENSG00000091436	ENSG00000089486	ENSG00000081189	ENSG00000070669	ENSG00000069974	ENSG00000044574	ENSG00000042286
GOTERM_BP_FAT	GO:0010941	regulation of cell death	LW	32	ENSG00000196975	ENSG00000188215	ENSG00000187288	ENSG00000182871	ENSG00000181284	ENSG00000181026	ENSG00000179222	ENSG00000166598	ENSG00000165240	ENSG00000159388	ENSG00000158234	ENSG00000155792	ENSG00000151929	ENSG00000137801	ENSG00000136634	ENSG00000135587	ENSG00000133639	ENSG00000130203	ENSG00000129473	ENSG00000124767	ENSG00000120833	ENSG00000118503	ENSG00000115170	ENSG00000113734	ENSG00000109943	ENSG00000105141	ENSG00000103490	ENSG00000100906	ENSG00000089820	ENSG00000089041	ENSG00000069399	ENSG00000023445
GOTERM_BP_FAT	GO:0010941	regulation of cell death	TC	18	ENSG00000197471	ENSG00000171791	ENSG00000171552	ENSG00000167772	ENSG00000166289	ENSG00000163545	ENSG00000160293	ENSG00000146192	ENSG00000142405	ENSG00000141582	ENSG00000127863	ENSG00000115425	ENSG00000115129	ENSG00000111537	ENSG00000111057	ENSG00000102096	ENSG00000067606	ENSG00000049249
GOTERM_BP_FAT	GO:0042981	regulation of apoptosis	common	47	ENSG00000204209	ENSG00000198959	ENSG00000198851	ENSG00000198355	ENSG00000196730	ENSG00000187098	ENSG00000186891	ENSG00000186827	ENSG00000182866	ENSG00000181104	ENSG00000171310	ENSG00000164733	ENSG00000163947	ENSG00000162894	ENSG00000160654	ENSG00000158006	ENSG00000157601	ENSG00000156299	ENSG00000154229	ENSG00000143669	ENSG00000141682	ENSG00000139193	ENSG00000137834	ENSG00000137193	ENSG00000134954	ENSG00000134243	ENSG00000132694	ENSG00000131203	ENSG00000121858	ENSG00000120885	ENSG00000117560	ENSG00000116824	ENSG00000116478	ENSG00000112715	ENSG00000110448	ENSG00000108691	ENSG00000100985	ENSG00000091436	ENSG00000089486	ENSG00000081189	ENSG00000070669	ENSG00000069974	ENSG00000044574	ENSG00000042286	ENSG00000026751
GOTERM_BP_FAT	GO:0042981	regulation of apoptosis	LW	32	ENSG00000196975	ENSG00000188215	ENSG00000187288	ENSG00000182871	ENSG00000181284	ENSG00000181026	ENSG00000179222	ENSG00000166598	ENSG00000165240	ENSG00000159388	ENSG00000158234	ENSG00000155792	ENSG00000151929	ENSG00000137801	ENSG00000136634	ENSG00000135587	ENSG00000133639	ENSG00000130203	ENSG00000129473	ENSG00000124767	ENSG00000120833	ENSG00000118503	ENSG00000115170	ENSG00000113734	ENSG00000109943	ENSG00000105141	ENSG00000103490	ENSG00000100906	ENSG00000089820	ENSG00000089041	ENSG00000069399	ENSG00000023445
GOTERM_BP_FAT	GO:0042981	regulation of apoptosis	TC	18	ENSG00000197471	ENSG00000171791	ENSG00000171552	ENSG00000167772	ENSG00000166289	ENSG00000163545	ENSG00000160293	ENSG00000146192	ENSG00000142405	ENSG00000141582	ENSG00000127863	ENSG00000115425	ENSG00000115129	ENSG00000111537	ENSG00000111057	ENSG00000102096	ENSG00000067606	ENSG00000049249
GOTERM_BP_FAT	GO:0045321	leukocyte activation	common	19	ENSG00000198851	ENSG00000196684	ENSG00000186827	ENSG00000182866	ENSG00000172116	ENSG00000168685	ENSG00000167984	ENSG00000167286	ENSG00000160654	ENSG00000153563	ENSG00000134242	ENSG00000117090	ENSG00000116824	ENSG00000115085	ENSG00000106348	ENSG00000103522	ENSG00000078401	ENSG00000069974	ENSG00000026751
GOTERM_BP_FAT	GO:0045321	leukocyte activation	LW	14	ENSG00000172673	ENSG00000169508	ENSG00000165240	ENSG00000164136	ENSG00000162692	ENSG00000158473	ENSG00000136634	ENSG00000125347	ENSG00000120738	ENSG00000115232	ENSG00000109943	ENSG00000089041	ENSG00000069399	ENSG00000064932
GOTERM_BP_FAT	GO:0045321	leukocyte activation	TC	4	ENSG00000197471	ENSG00000171791	ENSG00000150093	ENSG00000095585
GOTERM_BP_FAT	GO:0050865	regulation of cell activation	common	17	ENSG00000198851	ENSG00000186827	ENSG00000182866	ENSG00000168685	ENSG00000154096	ENSG00000150637	ENSG00000139193	ENSG00000137078	ENSG00000133661	ENSG00000131203	ENSG00000120217	ENSG00000116824	ENSG00000115085	ENSG00000110448	ENSG00000073861	ENSG00000069667	ENSG00000004468
GOTERM_BP_FAT	GO:0050865	regulation of cell activation	LW	9	ENSG00000164136	ENSG00000162692	ENSG00000149534	ENSG00000137801	ENSG00000136634	ENSG00000130203	ENSG00000130202	ENSG00000104853	ENSG00000077238
GOTERM_BP_FAT	GO:0050865	regulation of cell activation	TC	6	ENSG00000204252	ENSG00000197471	ENSG00000163599	ENSG00000150782	ENSG00000148516	ENSG00000111537
GOTERM_BP_FAT	GO:0002694	regulation of leukocyte activation	common	17	ENSG00000198851	ENSG00000186827	ENSG00000182866	ENSG00000168685	ENSG00000154096	ENSG00000150637	ENSG00000139193	ENSG00000137078	ENSG00000133661	ENSG00000131203	ENSG00000120217	ENSG00000116824	ENSG00000115085	ENSG00000110448	ENSG00000073861	ENSG00000069667	ENSG00000004468
GOTERM_BP_FAT	GO:0002694	regulation of leukocyte activation	LW	8	ENSG00000164136	ENSG00000162692	ENSG00000149534	ENSG00000137801	ENSG00000136634	ENSG00000130202	ENSG00000104853	ENSG00000077238
GOTERM_BP_FAT	GO:0002694	regulation of leukocyte activation	TC	6	ENSG00000204252	ENSG00000197471	ENSG00000163599	ENSG00000150782	ENSG00000148516	ENSG00000111537
GOTERM_BP_FAT	GO:0045087	innate immune response	common	16	ENSG00000196352	ENSG00000196083	ENSG00000161921	ENSG00000160703	ENSG00000158517	ENSG00000143669	ENSG00000134061	ENSG00000133661	ENSG00000126759	ENSG00000125730	ENSG00000120885	ENSG00000115604	ENSG00000108771	ENSG00000101347	ENSG00000069974	ENSG00000026751
GOTERM_BP_FAT	GO:0045087	innate immune response	LW	6	ENSG00000165168	ENSG00000158473	ENSG00000132170	ENSG00000123838	ENSG00000115607	ENSG00000101916
GOTERM_BP_FAT	GO:0045087	innate immune response	TC	1	ENSG00000198183
GOTERM_BP_FAT	GO:0012501	programmed cell death	common	33	ENSG00000204209	ENSG00000198959	ENSG00000196730	ENSG00000186891	ENSG00000182866	ENSG00000181104	ENSG00000180644	ENSG00000170476	ENSG00000170458	ENSG00000170421	ENSG00000163947	ENSG00000163687	ENSG00000163331	ENSG00000156299	ENSG00000145649	ENSG00000145088	ENSG00000141682	ENSG00000139193	ENSG00000132694	ENSG00000132530	ENSG00000129521	ENSG00000121858	ENSG00000120885	ENSG00000117560	ENSG00000109107	ENSG00000101255	ENSG00000100453	ENSG00000099985	ENSG00000099860	ENSG00000089486	ENSG00000081189	ENSG00000055332	ENSG00000042286
GOTERM_BP_FAT	GO:0012501	programmed cell death	LW	27	ENSG00000198900	ENSG00000188761	ENSG00000187288	ENSG00000181788	ENSG00000181649	ENSG00000181026	ENSG00000179222	ENSG00000158234	ENSG00000151929	ENSG00000143878	ENSG00000137801	ENSG00000130222	ENSG00000129473	ENSG00000126821	ENSG00000125657	ENSG00000118503	ENSG00000113734	ENSG00000105141	ENSG00000103490	ENSG00000100906	ENSG00000089820	ENSG00000087074	ENSG00000081913	ENSG00000081026	ENSG00000077684	ENSG00000061676	ENSG00000023445
GOTERM_BP_FAT	GO:0012501	programmed cell death	TC	14	ENSG00000171791	ENSG00000171552	ENSG00000166289	ENSG00000163545	ENSG00000160293	ENSG00000149269	ENSG00000146192	ENSG00000142405	ENSG00000141378	ENSG00000127863	ENSG00000111537	ENSG00000111057	ENSG00000105290	ENSG00000102096
GOTERM_BP_FAT	GO:0030217	T cell differentiation	common	7	ENSG00000198851	ENSG00000182866	ENSG00000168685	ENSG00000167286	ENSG00000153563	ENSG00000134242	ENSG00000115085
GOTERM_BP_FAT	GO:0030217	T cell differentiation	LW	7	ENSG00000172673	ENSG00000165240	ENSG00000164136	ENSG00000158473	ENSG00000125347	ENSG00000120738	ENSG00000069399
GOTERM_BP_FAT	GO:0030217	T cell differentiation	TC	2	ENSG00000197471	ENSG00000171791
GOTERM_BP_FAT	GO:0030098	lymphocyte differentiation	LW	11	ENSG00000172673	ENSG00000169508	ENSG00000165240	ENSG00000164136	ENSG00000162692	ENSG00000158473	ENSG00000136634	ENSG00000125347	ENSG00000120738	ENSG00000115232	ENSG00000069399
GOTERM_BP_FAT	GO:0030098	lymphocyte differentiation	common	7	ENSG00000198851	ENSG00000182866	ENSG00000168685	ENSG00000167286	ENSG00000153563	ENSG00000134242	ENSG00000115085
GOTERM_BP_FAT	GO:0030098	lymphocyte differentiation	TC	4	ENSG00000197471	ENSG00000171791	ENSG00000150093	ENSG00000095585
GOTERM_BP_FAT	GO:0050778	positive regulation of immune response	common	13	ENSG00000198851	ENSG00000198821	ENSG00000196352	ENSG00000183918	ENSG00000154096	ENSG00000150637	ENSG00000141293	ENSG00000134242	ENSG00000131203	ENSG00000126759	ENSG00000125730	ENSG00000120885	ENSG00000115085
GOTERM_BP_FAT	GO:0050778	positive regulation of immune response	LW	9	ENSG00000172673	ENSG00000164136	ENSG00000158473	ENSG00000130202	ENSG00000123838	ENSG00000109943	ENSG00000101916	ENSG00000100906	ENSG00000089041
GOTERM_BP_FAT	GO:0050778	positive regulation of immune response	TC	2	ENSG00000158869	ENSG00000090376
GOTERM_BP_FAT	GO:0048584	positive regulation of response to stimulus	common	20	ENSG00000204305	ENSG00000198959	ENSG00000198851	ENSG00000198821	ENSG00000196352	ENSG00000185507	ENSG00000183918	ENSG00000154229	ENSG00000154096	ENSG00000150637	ENSG00000141293	ENSG00000139193	ENSG00000134242	ENSG00000131203	ENSG00000126759	ENSG00000125730	ENSG00000120885	ENSG00000115085	ENSG00000112715	ENSG00000099985
GOTERM_BP_FAT	GO:0048584	positive regulation of response to stimulus	LW	10	ENSG00000172673	ENSG00000164136	ENSG00000158473	ENSG00000137801	ENSG00000130202	ENSG00000123838	ENSG00000109943	ENSG00000101916	ENSG00000100906	ENSG00000089041
GOTERM_BP_FAT	GO:0048584	positive regulation of response to stimulus	TC	3	ENSG00000158869	ENSG00000142405	ENSG00000090376
GOTERM_BP_FAT	GO:0002696	positive regulation of leukocyte activation	common	12	ENSG00000198851	ENSG00000186827	ENSG00000182866	ENSG00000168685	ENSG00000154096	ENSG00000150637	ENSG00000139193	ENSG00000116824	ENSG00000115085	ENSG00000110448	ENSG00000073861	ENSG00000004468
GOTERM_BP_FAT	GO:0002696	positive regulation of leukocyte activation	LW	6	ENSG00000164136	ENSG00000162692	ENSG00000149534	ENSG00000137801	ENSG00000130202	ENSG00000077238
GOTERM_BP_FAT	GO:0002696	positive regulation of leukocyte activation	TC	3	ENSG00000197471	ENSG00000150782	ENSG00000111537
GOTERM_BP_FAT	GO:0040012	regulation of locomotion	common	15	ENSG00000204305	ENSG00000181104	ENSG00000169245	ENSG00000161921	ENSG00000154229	ENSG00000154096	ENSG00000152894	ENSG00000132855	ENSG00000112715	ENSG00000101665	ENSG00000100985	ENSG00000078401	ENSG00000073060	ENSG00000071246	ENSG00000061273
GOTERM_BP_FAT	GO:0040012	regulation of locomotion	LW	11	ENSG00000182871	ENSG00000171105	ENSG00000162614	ENSG00000140463	ENSG00000137801	ENSG00000130203	ENSG00000125124	ENSG00000120318	ENSG00000108798	ENSG00000091136	ENSG00000075651
GOTERM_BP_FAT	GO:0040012	regulation of locomotion	TC	2	ENSG00000171791	ENSG00000140416
GOTERM_BP_FAT	GO:0051270	regulation of cell motion	common	14	ENSG00000181104	ENSG00000169245	ENSG00000161921	ENSG00000154096	ENSG00000152894	ENSG00000134954	ENSG00000132855	ENSG00000112715	ENSG00000101665	ENSG00000100985	ENSG00000078401	ENSG00000073060	ENSG00000071246	ENSG00000061273
GOTERM_BP_FAT	GO:0051270	regulation of cell motion	LW	12	ENSG00000182871	ENSG00000171105	ENSG00000162614	ENSG00000140463	ENSG00000137801	ENSG00000130203	ENSG00000125124	ENSG00000122863	ENSG00000120318	ENSG00000108798	ENSG00000091136	ENSG00000075651
GOTERM_BP_FAT	GO:0051270	regulation of cell motion	TC	2	ENSG00000171791	ENSG00000140416
GOTERM_BP_FAT	GO:0042330	taxis	common	15	ENSG00000186810	ENSG00000184451	ENSG00000169248	ENSG00000169245	ENSG00000163220	ENSG00000161921	ENSG00000160791	ENSG00000156234	ENSG00000154229	ENSG00000143669	ENSG00000133661	ENSG00000126353	ENSG00000108700	ENSG00000108691	ENSG00000102970
GOTERM_BP_FAT	GO:0042330	taxis	LW	8	ENSG00000173198	ENSG00000144648	ENSG00000136634	ENSG00000128340	ENSG00000121797	ENSG00000115009	ENSG00000075651	ENSG00000051382
GOTERM_BP_FAT	GO:0042330	taxis	TC	5	ENSG00000197471	ENSG00000173578	ENSG00000145824	ENSG00000111537	ENSG00000102962
GOTERM_BP_FAT	GO:0006935	chemotaxis	common	15	ENSG00000186810	ENSG00000184451	ENSG00000169248	ENSG00000169245	ENSG00000163220	ENSG00000161921	ENSG00000160791	ENSG00000156234	ENSG00000154229	ENSG00000143669	ENSG00000133661	ENSG00000126353	ENSG00000108700	ENSG00000108691	ENSG00000102970
GOTERM_BP_FAT	GO:0006935	chemotaxis	LW	8	ENSG00000173198	ENSG00000144648	ENSG00000136634	ENSG00000128340	ENSG00000121797	ENSG00000115009	ENSG00000075651	ENSG00000051382
GOTERM_BP_FAT	GO:0006935	chemotaxis	TC	5	ENSG00000197471	ENSG00000173578	ENSG00000145824	ENSG00000111537	ENSG00000102962
GOTERM_BP_FAT	GO:0006915	apoptosis	common	32	ENSG00000204209	ENSG00000196730	ENSG00000186891	ENSG00000182866	ENSG00000181104	ENSG00000180644	ENSG00000170476	ENSG00000170458	ENSG00000170421	ENSG00000163947	ENSG00000163687	ENSG00000163331	ENSG00000156299	ENSG00000145649	ENSG00000145088	ENSG00000141682	ENSG00000139193	ENSG00000132694	ENSG00000132530	ENSG00000129521	ENSG00000121858	ENSG00000120885	ENSG00000117560	ENSG00000109107	ENSG00000101255	ENSG00000100453	ENSG00000099985	ENSG00000099860	ENSG00000089486	ENSG00000081189	ENSG00000055332	ENSG00000042286
GOTERM_BP_FAT	GO:0006915	apoptosis	LW	26	ENSG00000188761	ENSG00000187288	ENSG00000181788	ENSG00000181649	ENSG00000181026	ENSG00000179222	ENSG00000158234	ENSG00000151929	ENSG00000143878	ENSG00000137801	ENSG00000130222	ENSG00000129473	ENSG00000126821	ENSG00000125657	ENSG00000118503	ENSG00000113734	ENSG00000105141	ENSG00000103490	ENSG00000100906	ENSG00000089820	ENSG00000087074	ENSG00000081913	ENSG00000081026	ENSG00000077684	ENSG00000061676	ENSG00000023445
GOTERM_BP_FAT	GO:0006915	apoptosis	TC	14	ENSG00000171791	ENSG00000171552	ENSG00000166289	ENSG00000163545	ENSG00000160293	ENSG00000149269	ENSG00000146192	ENSG00000142405	ENSG00000141378	ENSG00000127863	ENSG00000111537	ENSG00000111057	ENSG00000105290	ENSG00000102096
GOTERM_BP_FAT	GO:0009968	negative regulation of signal transduction	LW	15	ENSG00000197594	ENSG00000196396	ENSG00000166033	ENSG00000155792	ENSG00000137801	ENSG00000135824	ENSG00000129219	ENSG00000125388	ENSG00000124813	ENSG00000120833	ENSG00000120318	ENSG00000118503	ENSG00000115170	ENSG00000100906	ENSG00000089041
GOTERM_BP_FAT	GO:0009968	negative regulation of signal transduction	common	13	ENSG00000198851	ENSG00000185338	ENSG00000171310	ENSG00000160185	ENSG00000154229	ENSG00000154096	ENSG00000152804	ENSG00000137834	ENSG00000117152	ENSG00000116741	ENSG00000101665	ENSG00000090104	ENSG00000070018
GOTERM_BP_FAT	GO:0009968	negative regulation of signal transduction	TC	5	ENSG00000142405	ENSG00000106070	ENSG00000090376	ENSG00000078246	ENSG00000067606
GOTERM_BP_FAT	GO:0002521	leukocyte differentiation	LW	12	ENSG00000172673	ENSG00000169508	ENSG00000165240	ENSG00000164136	ENSG00000162692	ENSG00000158473	ENSG00000136634	ENSG00000132170	ENSG00000125347	ENSG00000120738	ENSG00000115232	ENSG00000069399
GOTERM_BP_FAT	GO:0002521	leukocyte differentiation	common	8	ENSG00000198851	ENSG00000182866	ENSG00000168685	ENSG00000167286	ENSG00000153563	ENSG00000134242	ENSG00000115085	ENSG00000100985
GOTERM_BP_FAT	GO:0002521	leukocyte differentiation	TC	5	ENSG00000197471	ENSG00000171791	ENSG00000164935	ENSG00000150093	ENSG00000095585
GOTERM_BP_FAT	GO:0050867	positive regulation of cell activation	common	12	ENSG00000198851	ENSG00000186827	ENSG00000182866	ENSG00000168685	ENSG00000154096	ENSG00000150637	ENSG00000139193	ENSG00000116824	ENSG00000115085	ENSG00000110448	ENSG00000073861	ENSG00000004468
GOTERM_BP_FAT	GO:0050867	positive regulation of cell activation	LW	6	ENSG00000164136	ENSG00000162692	ENSG00000149534	ENSG00000137801	ENSG00000130202	ENSG00000077238
GOTERM_BP_FAT	GO:0050867	positive regulation of cell activation	TC	3	ENSG00000197471	ENSG00000150782	ENSG00000111537
GOTERM_BP_FAT	GO:0010648	negative regulation of cell communication	LW	16	ENSG00000197594	ENSG00000196396	ENSG00000166033	ENSG00000155792	ENSG00000137801	ENSG00000136854	ENSG00000135824	ENSG00000129219	ENSG00000125388	ENSG00000124813	ENSG00000120833	ENSG00000120318	ENSG00000118503	ENSG00000115170	ENSG00000100906	ENSG00000089041
GOTERM_BP_FAT	GO:0010648	negative regulation of cell communication	common	14	ENSG00000198851	ENSG00000185338	ENSG00000171310	ENSG00000160185	ENSG00000154229	ENSG00000154096	ENSG00000152804	ENSG00000137834	ENSG00000117152	ENSG00000116741	ENSG00000101665	ENSG00000090104	ENSG00000070018	ENSG00000004468
GOTERM_BP_FAT	GO:0010648	negative regulation of cell communication	TC	5	ENSG00000142405	ENSG00000106070	ENSG00000090376	ENSG00000078246	ENSG00000067606
GOTERM_BP_FAT	GO:0008219	cell death	common	36	ENSG00000204209	ENSG00000198959	ENSG00000196730	ENSG00000186891	ENSG00000182866	ENSG00000181104	ENSG00000180644	ENSG00000170476	ENSG00000170458	ENSG00000170421	ENSG00000163947	ENSG00000163687	ENSG00000163331	ENSG00000163050	ENSG00000156299	ENSG00000145649	ENSG00000145088	ENSG00000141682	ENSG00000139193	ENSG00000132694	ENSG00000132530	ENSG00000129521	ENSG00000121858	ENSG00000120885	ENSG00000117560	ENSG00000109107	ENSG00000101255	ENSG00000100453	ENSG00000099985	ENSG00000099860	ENSG00000091436	ENSG00000089486	ENSG00000081189	ENSG00000068615	ENSG00000055332	ENSG00000042286
GOTERM_BP_FAT	GO:0008219	cell death	LW	29	ENSG00000198900	ENSG00000188761	ENSG00000187288	ENSG00000181788	ENSG00000181649	ENSG00000181026	ENSG00000179222	ENSG00000158234	ENSG00000151929	ENSG00000143878	ENSG00000137801	ENSG00000130222	ENSG00000129473	ENSG00000126821	ENSG00000125657	ENSG00000118503	ENSG00000113734	ENSG00000105141	ENSG00000103490	ENSG00000100906	ENSG00000089820	ENSG00000089041	ENSG00000087074	ENSG00000081913	ENSG00000081026	ENSG00000077684	ENSG00000072121	ENSG00000061676	ENSG00000023445
GOTERM_BP_FAT	GO:0008219	cell death	TC	16	ENSG00000171791	ENSG00000171552	ENSG00000166289	ENSG00000163545	ENSG00000160293	ENSG00000149269	ENSG00000146192	ENSG00000142405	ENSG00000141378	ENSG00000131018	ENSG00000127863	ENSG00000111537	ENSG00000111057	ENSG00000105290	ENSG00000102096	ENSG00000090382
GOTERM_BP_FAT	GO:0043066	negative regulation of apoptosis	common	21	ENSG00000198959	ENSG00000198355	ENSG00000196730	ENSG00000187098	ENSG00000186891	ENSG00000181104	ENSG00000171310	ENSG00000162894	ENSG00000158006	ENSG00000139193	ENSG00000137834	ENSG00000137193	ENSG00000134243	ENSG00000131203	ENSG00000120885	ENSG00000116478	ENSG00000112715	ENSG00000108691	ENSG00000081189	ENSG00000070669	ENSG00000044574
GOTERM_BP_FAT	GO:0043066	negative regulation of apoptosis	LW	17	ENSG00000196975	ENSG00000166598	ENSG00000159388	ENSG00000158234	ENSG00000151929	ENSG00000137801	ENSG00000136634	ENSG00000130203	ENSG00000129473	ENSG00000124767	ENSG00000120833	ENSG00000118503	ENSG00000115170	ENSG00000113734	ENSG00000100906	ENSG00000069399	ENSG00000023445
GOTERM_BP_FAT	GO:0043066	negative regulation of apoptosis	TC	8	ENSG00000171791	ENSG00000171552	ENSG00000167772	ENSG00000163545	ENSG00000141582	ENSG00000111057	ENSG00000102096	ENSG00000067606
GOTERM_BP_FAT	GO:0016265	death	common	36	ENSG00000204209	ENSG00000198959	ENSG00000196730	ENSG00000186891	ENSG00000182866	ENSG00000181104	ENSG00000180644	ENSG00000170476	ENSG00000170458	ENSG00000170421	ENSG00000163947	ENSG00000163687	ENSG00000163331	ENSG00000163050	ENSG00000156299	ENSG00000145649	ENSG00000145088	ENSG00000141682	ENSG00000139193	ENSG00000132694	ENSG00000132530	ENSG00000129521	ENSG00000121858	ENSG00000120885	ENSG00000117560	ENSG00000109107	ENSG00000101255	ENSG00000100453	ENSG00000099985	ENSG00000099860	ENSG00000091436	ENSG00000089486	ENSG00000081189	ENSG00000068615	ENSG00000055332	ENSG00000042286
GOTERM_BP_FAT	GO:0016265	death	LW	30	ENSG00000198900	ENSG00000188761	ENSG00000187288	ENSG00000186891	ENSG00000181649	ENSG00000180644	ENSG00000179222	ENSG00000170476	ENSG00000170458	ENSG00000170421	ENSG00000163331	ENSG00000156299	ENSG00000145088	ENSG00000141682	ENSG00000129521	ENSG00000129473	ENSG00000126821	ENSG00000125657	ENSG00000121858	ENSG00000117560	ENSG00000100906	ENSG00000100453	ENSG00000099985	ENSG00000089820	ENSG00000089041	ENSG00000081189	ENSG00000081026	ENSG00000077684	ENSG00000072121	ENSG00000023445
GOTERM_BP_FAT	GO:0016265	death	TC	16	ENSG00000171791	ENSG00000171552	ENSG00000166289	ENSG00000163545	ENSG00000160293	ENSG00000149269	ENSG00000146192	ENSG00000142405	ENSG00000141378	ENSG00000131018	ENSG00000127863	ENSG00000111537	ENSG00000111057	ENSG00000105290	ENSG00000102096	ENSG00000090382
GOTERM_BP_FAT	GO:0002460	adaptive immune response based on somatic recombination of immune receptors built from immunoglobulin superfamily domains	common	8	ENSG00000196352	ENSG00000153563	ENSG00000139193	ENSG00000125730	ENSG00000122224	ENSG00000120885	ENSG00000112715	ENSG00000069974
GOTERM_BP_FAT	GO:0002460	adaptive immune response based on somatic recombination of immune receptors built from immunoglobulin superfamily domains	LW	6	ENSG00000137496	ENSG00000136634	ENSG00000123838	ENSG00000109943	ENSG00000101916	ENSG00000069399
GOTERM_BP_FAT	GO:0002460	adaptive immune response based on somatic recombination of immune receptors built from immunoglobulin superfamily domains	TC	2	ENSG00000158869	ENSG00000150782
GOTERM_BP_FAT	GO:0006917	induction of apoptosis	common	24	ENSG00000204209	ENSG00000198959	ENSG00000198851	ENSG00000196730	ENSG00000182866	ENSG00000163947	ENSG00000157601	ENSG00000156299	ENSG00000154229	ENSG00000143669	ENSG00000141682	ENSG00000139193	ENSG00000134954	ENSG00000134243	ENSG00000132694	ENSG00000121858	ENSG00000117560	ENSG00000116824	ENSG00000110448	ENSG00000089486	ENSG00000069974	ENSG00000042286	ENSG00000026751	ENSG00000004468
GOTERM_BP_FAT	GO:0006917	induction of apoptosis	LW	11	ENSG00000187288	ENSG00000181026	ENSG00000179222	ENSG00000135587	ENSG00000130203	ENSG00000113734	ENSG00000109943	ENSG00000105141	ENSG00000103490	ENSG00000089820	ENSG00000069399
GOTERM_BP_FAT	GO:0006917	induction of apoptosis	TC	7	ENSG00000197471	ENSG00000166289	ENSG00000160293	ENSG00000146192	ENSG00000127863	ENSG00000115129	ENSG00000049249
GOTERM_BP_FAT	GO:0043069	negative regulation of programmed cell death	common	21	ENSG00000198959	ENSG00000198355	ENSG00000196730	ENSG00000187098	ENSG00000186891	ENSG00000181104	ENSG00000171310	ENSG00000162894	ENSG00000158006	ENSG00000139193	ENSG00000137834	ENSG00000137193	ENSG00000134243	ENSG00000131203	ENSG00000120885	ENSG00000116478	ENSG00000112715	ENSG00000108691	ENSG00000081189	ENSG00000070669	ENSG00000044574
GOTERM_BP_FAT	GO:0043069	negative regulation of programmed cell death	LW	17	ENSG00000196975	ENSG00000166598	ENSG00000159388	ENSG00000158234	ENSG00000151929	ENSG00000137801	ENSG00000136634	ENSG00000130203	ENSG00000129473	ENSG00000124767	ENSG00000120833	ENSG00000118503	ENSG00000115170	ENSG00000113734	ENSG00000100906	ENSG00000069399	ENSG00000023445
GOTERM_BP_FAT	GO:0043069	negative regulation of programmed cell death	TC	8	ENSG00000171791	ENSG00000171552	ENSG00000167772	ENSG00000163545	ENSG00000141582	ENSG00000111057	ENSG00000102096	ENSG00000067606
GOTERM_BP_FAT	GO:0012502	induction of programmed cell death	common	24	ENSG00000204209	ENSG00000198959	ENSG00000198851	ENSG00000196730	ENSG00000182866	ENSG00000163947	ENSG00000157601	ENSG00000156299	ENSG00000154229	ENSG00000143669	ENSG00000141682	ENSG00000139193	ENSG00000134954	ENSG00000134243	ENSG00000132694	ENSG00000121858	ENSG00000117560	ENSG00000116824	ENSG00000110448	ENSG00000089486	ENSG00000069974	ENSG00000042286	ENSG00000026751	ENSG00000004468
GOTERM_BP_FAT	GO:0012502	induction of programmed cell death	LW	11	ENSG00000187288	ENSG00000181026	ENSG00000179222	ENSG00000135587	ENSG00000130203	ENSG00000113734	ENSG00000109943	ENSG00000105141	ENSG00000103490	ENSG00000089820	ENSG00000069399
GOTERM_BP_FAT	GO:0012502	induction of programmed cell death	TC	7	ENSG00000197471	ENSG00000166289	ENSG00000160293	ENSG00000146192	ENSG00000127863	ENSG00000115129	ENSG00000049249
GOTERM_BP_FAT	GO:0060548	negative regulation of cell death	common	21	ENSG00000198959	ENSG00000198355	ENSG00000196730	ENSG00000187098	ENSG00000186891	ENSG00000181104	ENSG00000171310	ENSG00000162894	ENSG00000158006	ENSG00000139193	ENSG00000137834	ENSG00000137193	ENSG00000134243	ENSG00000131203	ENSG00000120885	ENSG00000116478	ENSG00000112715	ENSG00000108691	ENSG00000081189	ENSG00000070669	ENSG00000044574
GOTERM_BP_FAT	GO:0060548	negative regulation of cell death	LW	17	ENSG00000196975	ENSG00000166598	ENSG00000159388	ENSG00000158234	ENSG00000151929	ENSG00000137801	ENSG00000136634	ENSG00000130203	ENSG00000129473	ENSG00000124767	ENSG00000120833	ENSG00000118503	ENSG00000115170	ENSG00000113734	ENSG00000100906	ENSG00000069399	ENSG00000023445
GOTERM_BP_FAT	GO:0060548	negative regulation of cell death	TC	8	ENSG00000171791	ENSG00000171552	ENSG00000167772	ENSG00000163545	ENSG00000141582	ENSG00000111057	ENSG00000102096	ENSG00000067606
GOTERM_BP_FAT	GO:0040017	positive regulation of locomotion	common	11	ENSG00000204305	ENSG00000181104	ENSG00000169245	ENSG00000161921	ENSG00000154229	ENSG00000132855	ENSG00000112715	ENSG00000100985	ENSG00000078401	ENSG00000073060	ENSG00000061273
GOTERM_BP_FAT	GO:0040017	positive regulation of locomotion	LW	5	ENSG00000182871	ENSG00000171105	ENSG00000137801	ENSG00000091136	ENSG00000075651
GOTERM_BP_FAT	GO:0040017	positive regulation of locomotion	TC	1	ENSG00000171791
GOTERM_BP_FAT	GO:0051272	positive regulation of cell motion	common	10	ENSG00000181104	ENSG00000169245	ENSG00000161921	ENSG00000134954	ENSG00000132855	ENSG00000112715	ENSG00000100985	ENSG00000078401	ENSG00000073060	ENSG00000061273
GOTERM_BP_FAT	GO:0051272	positive regulation of cell motion	LW	6	ENSG00000182871	ENSG00000171105	ENSG00000137801	ENSG00000122863	ENSG00000091136	ENSG00000075651
GOTERM_BP_FAT	GO:0051272	positive regulation of cell motion	TC	1	ENSG00000171791
GOTERM_BP_FAT	GO:0002449	lymphocyte mediated immunity	common	9	ENSG00000196352	ENSG00000153563	ENSG00000143669	ENSG00000139193	ENSG00000125730	ENSG00000122224	ENSG00000120885	ENSG00000069974	ENSG00000026751
GOTERM_BP_FAT	GO:0002449	lymphocyte mediated immunity	LW	4	ENSG00000123838	ENSG00000109943	ENSG00000101916	ENSG00000069399
GOTERM_BP_FAT	GO:0002449	lymphocyte mediated immunity	TC	1	ENSG00000158869
GOTERM_BP_FAT	GO:0043068	positive regulation of programmed cell death	common	28	ENSG00000204209	ENSG00000198959	ENSG00000198851	ENSG00000196730	ENSG00000188906	ENSG00000182866	ENSG00000163947	ENSG00000157601	ENSG00000156299	ENSG00000154229	ENSG00000143669	ENSG00000141682	ENSG00000139193	ENSG00000134954	ENSG00000134243	ENSG00000132694	ENSG00000121858	ENSG00000117560	ENSG00000116824	ENSG00000110448	ENSG00000100985	ENSG00000091436	ENSG00000089486	ENSG00000069974	ENSG00000042286	ENSG00000026751	ENSG00000006747	ENSG00000004468
GOTERM_BP_FAT	GO:0043068	positive regulation of programmed cell death	LW	15	ENSG00000188215	ENSG00000187288	ENSG00000182871	ENSG00000181026	ENSG00000179222	ENSG00000136634	ENSG00000135587	ENSG00000130203	ENSG00000113734	ENSG00000109943	ENSG00000105141	ENSG00000103490	ENSG00000089820	ENSG00000089041	ENSG00000069399
GOTERM_BP_FAT	GO:0043068	positive regulation of programmed cell death	TC	10	ENSG00000197471	ENSG00000171791	ENSG00000171552	ENSG00000166289	ENSG00000160293	ENSG00000146192	ENSG00000127863	ENSG00000115129	ENSG00000111537	ENSG00000049249
GOTERM_BP_FAT	GO:0010942	positive regulation of cell death	common	28	ENSG00000204209	ENSG00000198959	ENSG00000198851	ENSG00000196730	ENSG00000188906	ENSG00000182866	ENSG00000163947	ENSG00000157601	ENSG00000156299	ENSG00000154229	ENSG00000143669	ENSG00000141682	ENSG00000139193	ENSG00000134954	ENSG00000134243	ENSG00000132694	ENSG00000121858	ENSG00000117560	ENSG00000116824	ENSG00000110448	ENSG00000100985	ENSG00000091436	ENSG00000089486	ENSG00000069974	ENSG00000042286	ENSG00000026751	ENSG00000006747	ENSG00000004468
GOTERM_BP_FAT	GO:0010942	positive regulation of cell death	LW	15	ENSG00000188215	ENSG00000187288	ENSG00000182871	ENSG00000181026	ENSG00000179222	ENSG00000136634	ENSG00000135587	ENSG00000130203	ENSG00000113734	ENSG00000109943	ENSG00000105141	ENSG00000103490	ENSG00000089820	ENSG00000089041	ENSG00000069399
GOTERM_BP_FAT	GO:0010942	positive regulation of cell death	TC	10	ENSG00000197471	ENSG00000171791	ENSG00000171552	ENSG00000166289	ENSG00000160293	ENSG00000146192	ENSG00000127863	ENSG00000115129	ENSG00000111537	ENSG00000049249
GOTERM_BP_FAT	GO:0030334	regulation of cell migration	common	13	ENSG00000181104	ENSG00000169245	ENSG00000161921	ENSG00000154096	ENSG00000152894	ENSG00000132855	ENSG00000112715	ENSG00000101665	ENSG00000100985	ENSG00000078401	ENSG00000073060	ENSG00000071246	ENSG00000061273
GOTERM_BP_FAT	GO:0030334	regulation of cell migration	LW	9	ENSG00000182871	ENSG00000171105	ENSG00000162614	ENSG00000137801	ENSG00000130203	ENSG00000120318	ENSG00000108798	ENSG00000091136	ENSG00000075651
GOTERM_BP_FAT	GO:0030334	regulation of cell migration	TC	2	ENSG00000171791	ENSG00000140416
GOTERM_BP_FAT	GO:0007243	protein kinase cascade	common	21	ENSG00000204305	ENSG00000204209	ENSG00000196730	ENSG00000188906	ENSG00000185338	ENSG00000181104	ENSG00000167984	ENSG00000162302	ENSG00000158050	ENSG00000154310	ENSG00000154229	ENSG00000139193	ENSG00000120875	ENSG00000117152	ENSG00000115085	ENSG00000108691	ENSG00000099985	ENSG00000099860	ENSG00000091436	ENSG00000082074	ENSG00000078401
GOTERM_BP_FAT	GO:0007243	protein kinase cascade	LW	17	ENSG00000171105	ENSG00000170145	ENSG00000143507	ENSG00000142733	ENSG00000137801	ENSG00000136634	ENSG00000135587	ENSG00000130222	ENSG00000123609	ENSG00000120833	ENSG00000101916	ENSG00000100906	ENSG00000095370	ENSG00000089041	ENSG00000069399	ENSG00000051382	ENSG00000023516
GOTERM_BP_FAT	GO:0007243	protein kinase cascade	TC	6	ENSG00000149269	ENSG00000145861	ENSG00000142405	ENSG00000127863	ENSG00000123131	ENSG00000111537
GOTERM_BP_FAT	GO:0006916	anti-apoptosis	LW	26	ENSG00000196975	ENSG00000196975	ENSG00000166598	ENSG00000166598	ENSG00000151929	ENSG00000151929	ENSG00000137801	ENSG00000137801	ENSG00000136634	ENSG00000136634	ENSG00000130203	ENSG00000130203	ENSG00000129473	ENSG00000129473	ENSG00000124767	ENSG00000124767	ENSG00000120833	ENSG00000120833	ENSG00000118503	ENSG00000118503	ENSG00000113734	ENSG00000113734	ENSG00000100906	ENSG00000100906	ENSG00000023445	ENSG00000023445
GOTERM_BP_FAT	GO:0006916	anti-apoptosis	common	12	ENSG00000198959	ENSG00000196730	ENSG00000186891	ENSG00000162894	ENSG00000158006	ENSG00000139193	ENSG00000120885	ENSG00000116478	ENSG00000112715	ENSG00000108691	ENSG00000081189	ENSG00000044574
GOTERM_BP_FAT	GO:0006916	anti-apoptosis	TC	5	ENSG00000171791	ENSG00000171552	ENSG00000141582	ENSG00000102096	ENSG00000067606
GOTERM_BP_FAT	GO:0007585	respiratory gaseous exchange	common	7	ENSG00000204103	ENSG00000175564	ENSG00000171310	ENSG00000168878	ENSG00000168484	ENSG00000133661	ENSG00000078401
GOTERM_BP_FAT	GO:0007585	respiratory gaseous exchange	LW	2	ENSG00000173198	ENSG00000150540
GOTERM_BP_FAT	GO:0007585	respiratory gaseous exchange	TC	0
GOTERM_BP_FAT	GO:0051249	regulation of lymphocyte activation	common	15	ENSG00000198851	ENSG00000186827	ENSG00000182866	ENSG00000168685	ENSG00000154096	ENSG00000139193	ENSG00000137078	ENSG00000133661	ENSG00000131203	ENSG00000120217	ENSG00000116824	ENSG00000115085	ENSG00000110448	ENSG00000073861	ENSG00000004468
GOTERM_BP_FAT	GO:0051249	regulation of lymphocyte activation	TC	6	ENSG00000204252	ENSG00000197471	ENSG00000163599	ENSG00000150782	ENSG00000148516	ENSG00000111537
GOTERM_BP_FAT	GO:0051249	regulation of lymphocyte activation	LW	5	ENSG00000164136	ENSG00000162692	ENSG00000136634	ENSG00000104853	ENSG00000077238
GOTERM_BP_FAT	GO:0031349	positive regulation of defense response	common	8	ENSG00000198959	ENSG00000185507	ENSG00000183918	ENSG00000154229	ENSG00000150637	ENSG00000131203	ENSG00000125730	ENSG00000099985
GOTERM_BP_FAT	GO:0031349	positive regulation of defense response	LW	5	ENSG00000158473	ENSG00000130202	ENSG00000109943	ENSG00000101916	ENSG00000100906
GOTERM_BP_FAT	GO:0031349	positive regulation of defense response	TC	3	ENSG00000158869	ENSG00000142405	ENSG00000090376
GOTERM_BP_FAT	GO:0043065	positive regulation of apoptosis	common	27	ENSG00000204209	ENSG00000198959	ENSG00000198851	ENSG00000196730	ENSG00000182866	ENSG00000163947	ENSG00000157601	ENSG00000156299	ENSG00000154229	ENSG00000143669	ENSG00000141682	ENSG00000139193	ENSG00000134954	ENSG00000134243	ENSG00000132694	ENSG00000121858	ENSG00000117560	ENSG00000116824	ENSG00000110448	ENSG00000100985	ENSG00000091436	ENSG00000089486	ENSG00000069974	ENSG00000042286	ENSG00000026751	ENSG00000006747	ENSG00000004468
GOTERM_BP_FAT	GO:0043065	positive regulation of apoptosis	LW	15	ENSG00000188215	ENSG00000187288	ENSG00000182871	ENSG00000181026	ENSG00000179222	ENSG00000136634	ENSG00000135587	ENSG00000130203	ENSG00000113734	ENSG00000109943	ENSG00000105141	ENSG00000103490	ENSG00000089820	ENSG00000089041	ENSG00000069399
GOTERM_BP_FAT	GO:0043065	positive regulation of apoptosis	TC	10	ENSG00000197471	ENSG00000171791	ENSG00000171552	ENSG00000166289	ENSG00000160293	ENSG00000146192	ENSG00000127863	ENSG00000115129	ENSG00000111537	ENSG00000049249
GOTERM_BP_FAT	GO:0051050	positive regulation of transport	common	13	ENSG00000186827	ENSG00000184702	ENSG00000181104	ENSG00000169860	ENSG00000154229	ENSG00000154096	ENSG00000139193	ENSG00000133661	ENSG00000125730	ENSG00000110436	ENSG00000078401	ENSG00000006747	ENSG00000004468
GOTERM_BP_FAT	GO:0051050	positive regulation of transport	LW	13	ENSG00000171105	ENSG00000149534	ENSG00000136634	ENSG00000130203	ENSG00000119729	ENSG00000109943	ENSG00000107779	ENSG00000104783	ENSG00000103490	ENSG00000101670	ENSG00000100906	ENSG00000089041	ENSG00000025434
GOTERM_BP_FAT	GO:0051050	positive regulation of transport	TC	5	ENSG00000145861	ENSG00000142405	ENSG00000111537	ENSG00000106633	ENSG00000067606
GOTERM_BP_FAT	GO:0042325	regulation of phosphorylation	common	26	ENSG00000204209	ENSG00000198851	ENSG00000186827	ENSG00000185338	ENSG00000181104	ENSG00000158050	ENSG00000154229	ENSG00000154096	ENSG00000147852	ENSG00000137834	ENSG00000137193	ENSG00000124145	ENSG00000123975	ENSG00000118971	ENSG00000117152	ENSG00000116641	ENSG00000115355	ENSG00000113328	ENSG00000101665	ENSG00000101255	ENSG00000100151	ENSG00000099985	ENSG00000099860	ENSG00000091436	ENSG00000078401	ENSG00000013725
GOTERM_BP_FAT	GO:0042325	regulation of phosphorylation	LW	18	ENSG00000197594	ENSG00000173175	ENSG00000171105	ENSG00000171033	ENSG00000168734	ENSG00000165240	ENSG00000155792	ENSG00000149534	ENSG00000145431	ENSG00000142733	ENSG00000137801	ENSG00000130222	ENSG00000130203	ENSG00000107779	ENSG00000102780	ENSG00000094804	ENSG00000089041	ENSG00000051382
GOTERM_BP_FAT	GO:0042325	regulation of phosphorylation	TC	11	ENSG00000171791	ENSG00000160293	ENSG00000158402	ENSG00000149269	ENSG00000145861	ENSG00000142405	ENSG00000113161	ENSG00000111537	ENSG00000090376	ENSG00000067606	ENSG00000015133
GOTERM_BP_FAT	GO:0050852	T cell receptor signaling pathway	common	6	ENSG00000198851	ENSG00000198821	ENSG00000154096	ENSG00000141293	ENSG00000134242	ENSG00000115085
GOTERM_BP_FAT	GO:0050852	T cell receptor signaling pathway	LW	1	ENSG00000172673
GOTERM_BP_FAT	GO:0050852	T cell receptor signaling pathway	TC	0
GOTERM_BP_FAT	GO:0030335	positive regulation of cell migration	common	9	ENSG00000181104	ENSG00000169245	ENSG00000161921	ENSG00000132855	ENSG00000112715	ENSG00000100985	ENSG00000078401	ENSG00000073060	ENSG00000061273
GOTERM_BP_FAT	GO:0030335	positive regulation of cell migration	LW	5	ENSG00000182871	ENSG00000171105	ENSG00000137801	ENSG00000091136	ENSG00000075651
GOTERM_BP_FAT	GO:0030335	positive regulation of cell migration	TC	1	ENSG00000171791
GOTERM_BP_FAT	GO:0010876	lipid localization	common	13	ENSG00000206190	ENSG00000180530	ENSG00000163586	ENSG00000147852	ENSG00000144909	ENSG00000132855	ENSG00000130304	ENSG00000124406	ENSG00000120885	ENSG00000113396	ENSG00000100979	ENSG00000073060	ENSG00000005469
GOTERM_BP_FAT	GO:0010876	lipid localization	LW	7	ENSG00000197594	ENSG00000132170	ENSG00000130203	ENSG00000104783	ENSG00000101670	ENSG00000089041	ENSG00000057252
GOTERM_BP_FAT	GO:0010876	lipid localization	TC	0
GOTERM_BP_FAT	GO:0051174	regulation of phosphorus metabolic process	common	27	ENSG00000204209	ENSG00000198851	ENSG00000186827	ENSG00000185338	ENSG00000181104	ENSG00000158050	ENSG00000154229	ENSG00000154096	ENSG00000147852	ENSG00000137834	ENSG00000137193	ENSG00000124145	ENSG00000123975	ENSG00000118971	ENSG00000117152	ENSG00000116641	ENSG00000115355	ENSG00000113328	ENSG00000102445	ENSG00000101665	ENSG00000101255	ENSG00000100151	ENSG00000099985	ENSG00000099860	ENSG00000091436	ENSG00000078401	ENSG00000013725
GOTERM_BP_FAT	GO:0051174	regulation of phosphorus metabolic process	LW	18	ENSG00000197594	ENSG00000173175	ENSG00000171105	ENSG00000171033	ENSG00000168734	ENSG00000165240	ENSG00000155792	ENSG00000149534	ENSG00000145431	ENSG00000142733	ENSG00000137801	ENSG00000130222	ENSG00000130203	ENSG00000107779	ENSG00000102780	ENSG00000094804	ENSG00000089041	ENSG00000051382
GOTERM_BP_FAT	GO:0051174	regulation of phosphorus metabolic process	TC	11	ENSG00000171791	ENSG00000160293	ENSG00000158402	ENSG00000149269	ENSG00000145861	ENSG00000142405	ENSG00000113161	ENSG00000111537	ENSG00000090376	ENSG00000067606	ENSG00000015133
GOTERM_BP_FAT	GO:0019220	regulation of phosphate metabolic process	common	27	ENSG00000204209	ENSG00000198851	ENSG00000186827	ENSG00000185338	ENSG00000181104	ENSG00000158050	ENSG00000154229	ENSG00000154096	ENSG00000147852	ENSG00000137834	ENSG00000137193	ENSG00000124145	ENSG00000123975	ENSG00000118971	ENSG00000117152	ENSG00000116641	ENSG00000115355	ENSG00000113328	ENSG00000102445	ENSG00000101665	ENSG00000101255	ENSG00000100151	ENSG00000099985	ENSG00000099860	ENSG00000091436	ENSG00000078401	ENSG00000013725
GOTERM_BP_FAT	GO:0019220	regulation of phosphate metabolic process	LW	18	ENSG00000197594	ENSG00000173175	ENSG00000171105	ENSG00000171033	ENSG00000168734	ENSG00000165240	ENSG00000155792	ENSG00000149534	ENSG00000145431	ENSG00000142733	ENSG00000137801	ENSG00000130222	ENSG00000130203	ENSG00000107779	ENSG00000102780	ENSG00000094804	ENSG00000089041	ENSG00000051382
GOTERM_BP_FAT	GO:0019220	regulation of phosphate metabolic process	TC	11	ENSG00000171791	ENSG00000160293	ENSG00000158402	ENSG00000149269	ENSG00000145861	ENSG00000142405	ENSG00000113161	ENSG00000111537	ENSG00000090376	ENSG00000067606	ENSG00000015133
GOTERM_BP_FAT	GO:0007242	intracellular signaling cascade	common	52	ENSG00000204305	ENSG00000204209	ENSG00000198959	ENSG00000196730	ENSG00000188906	ENSG00000187091	ENSG00000185338	ENSG00000181104	ENSG00000180530	ENSG00000172794	ENSG00000169860	ENSG00000167984	ENSG00000163947	ENSG00000163328	ENSG00000162302	ENSG00000160271	ENSG00000158186	ENSG00000158050	ENSG00000156299	ENSG00000154310	ENSG00000154229	ENSG00000143776	ENSG00000139193	ENSG00000137841	ENSG00000137575	ENSG00000132694	ENSG00000130038	ENSG00000125910	ENSG00000124181	ENSG00000123975	ENSG00000120875	ENSG00000117152	ENSG00000116191	ENSG00000115896	ENSG00000115085	ENSG00000108691	ENSG00000105287	ENSG00000105173	ENSG00000101665	ENSG00000100351	ENSG00000099985	ENSG00000099860	ENSG00000091436	ENSG00000090104	ENSG00000089486
GOTERM_BP_FAT	GO:0007242	intracellular signaling cascade	LW	45	ENSG00000196639	ENSG00000188822	ENSG00000186469	ENSG00000185989	ENSG00000181788	ENSG00000181026	ENSG00000178385	ENSG00000175063	ENSG00000173175	ENSG00000171105	ENSG00000170145	ENSG00000167461	ENSG00000165997	ENSG00000155792	ENSG00000143878	ENSG00000143507	ENSG00000142733	ENSG00000137801	ENSG00000136634	ENSG00000135587	ENSG00000130222	ENSG00000130203	ENSG00000129219	ENSG00000128340	ENSG00000124225	ENSG00000123609	ENSG00000122644	ENSG00000120833	ENSG00000119729	ENSG00000112210	ENSG00000102780	ENSG00000101916	ENSG00000100906	ENSG00000095370	ENSG00000089820	ENSG00000089041	ENSG00000081026	ENSG00000078061	ENSG00000075651	ENSG00000069399	ENSG00000061918	ENSG00000051382	ENSG00000031081	ENSG00000023516	ENSG00000005981
GOTERM_BP_FAT	GO:0007242	intracellular signaling cascade	TC	18	ENSG00000179604	ENSG00000173578	ENSG00000172575	ENSG00000160293	ENSG00000149269	ENSG00000145861	ENSG00000143622	ENSG00000142405	ENSG00000132819	ENSG00000128918	ENSG00000127863	ENSG00000123131	ENSG00000119138	ENSG00000111537	ENSG00000108830	ENSG00000106633	ENSG00000095585	ENSG00000067606
GOTERM_BP_FAT	GO:0016044	membrane organization	common	19	ENSG00000187838	ENSG00000171365	ENSG00000170458	ENSG00000161921	ENSG00000155463	ENSG00000147852	ENSG00000138073	ENSG00000136717	ENSG00000134243	ENSG00000133661	ENSG00000131477	ENSG00000116824	ENSG00000115355	ENSG00000111450	ENSG00000100151	ENSG00000081479	ENSG00000073060	ENSG00000070018	ENSG00000068615
GOTERM_BP_FAT	GO:0016044	membrane organization	LW	18	ENSG00000197548	ENSG00000167461	ENSG00000157191	ENSG00000137801	ENSG00000136854	ENSG00000135604	ENSG00000130203	ENSG00000129219	ENSG00000125388	ENSG00000113734	ENSG00000110047	ENSG00000104783	ENSG00000100575	ENSG00000095066	ENSG00000092531	ENSG00000089041	ENSG00000087253	ENSG00000010327
GOTERM_BP_FAT	GO:0016044	membrane organization	TC	10	ENSG00000171791	ENSG00000171552	ENSG00000158869	ENSG00000137486	ENSG00000130787	ENSG00000109686	ENSG00000105290	ENSG00000072274	ENSG00000011028	ENSG00000010278
GOTERM_BP_FAT	GO:0010594	regulation of endothelial cell migration	common	5	ENSG00000112715	ENSG00000078401	ENSG00000073060	ENSG00000071246	ENSG00000061273
GOTERM_BP_FAT	GO:0010594	regulation of endothelial cell migration	LW	2	ENSG00000137801	ENSG00000130203
GOTERM_BP_FAT	GO:0010594	regulation of endothelial cell migration	TC	0
GOTERM_BP_FAT	GO:0050863	regulation of T cell activation	common	11	ENSG00000198851	ENSG00000182866	ENSG00000168685	ENSG00000154096	ENSG00000137078	ENSG00000133661	ENSG00000131203	ENSG00000120217	ENSG00000116824	ENSG00000115085	ENSG00000110448
GOTERM_BP_FAT	GO:0050863	regulation of T cell activation	TC	6	ENSG00000204252	ENSG00000197471	ENSG00000163599	ENSG00000150782	ENSG00000148516	ENSG00000111537
GOTERM_BP_FAT	GO:0050863	regulation of T cell activation	LW	5	ENSG00000164136	ENSG00000162692	ENSG00000136634	ENSG00000104853	ENSG00000077238
GOTERM_BP_FAT	GO:0045859	regulation of protein kinase activity	common	19	ENSG00000204209	ENSG00000186827	ENSG00000181104	ENSG00000158050	ENSG00000154229	ENSG00000154096	ENSG00000147852	ENSG00000137193	ENSG00000124145	ENSG00000123975	ENSG00000118971	ENSG00000117152	ENSG00000115355	ENSG00000113328	ENSG00000101255	ENSG00000100151	ENSG00000099860	ENSG00000091436	ENSG00000078401
GOTERM_BP_FAT	GO:0045859	regulation of protein kinase activity	LW	15	ENSG00000173175	ENSG00000171105	ENSG00000171033	ENSG00000168734	ENSG00000155792	ENSG00000149534	ENSG00000145431	ENSG00000142733	ENSG00000137801	ENSG00000130222	ENSG00000130203	ENSG00000102780	ENSG00000094804	ENSG00000089041	ENSG00000051382
GOTERM_BP_FAT	GO:0045859	regulation of protein kinase activity	TC	6	ENSG00000158402	ENSG00000149269	ENSG00000145861	ENSG00000113161	ENSG00000090376	ENSG00000067606
GOTERM_BP_FAT	GO:0031100	organ regeneration	common	6	ENSG00000185338	ENSG00000167601	ENSG00000109107	ENSG00000108691	ENSG00000105173	ENSG00000081479
GOTERM_BP_FAT	GO:0031100	organ regeneration	LW	1	ENSG00000132170
GOTERM_BP_FAT	GO:0031100	organ regeneration	TC	0
GOTERM_BP_FAT	GO:0002443	leukocyte mediated immunity	common	9	ENSG00000196352	ENSG00000153563	ENSG00000143669	ENSG00000139193	ENSG00000125730	ENSG00000122224	ENSG00000120885	ENSG00000069974	ENSG00000026751
GOTERM_BP_FAT	GO:0002443	leukocyte mediated immunity	LW	4	ENSG00000123838	ENSG00000109943	ENSG00000101916	ENSG00000069399
GOTERM_BP_FAT	GO:0002443	leukocyte mediated immunity	TC	1	ENSG00000158869
GOTERM_BP_FAT	GO:0045058	T cell selection	common	3	ENSG00000198851	ENSG00000167286	ENSG00000115085
GOTERM_BP_FAT	GO:0045058	T cell selection	LW	3	ENSG00000172673	ENSG00000164136	ENSG00000158473
GOTERM_BP_FAT	GO:0045058	T cell selection	TC	2	ENSG00000197471	ENSG00000171791
GOTERM_BP_FAT	GO:0009617	response to bacterium	common	13	ENSG00000185338	ENSG00000181104	ENSG00000170458	ENSG00000147852	ENSG00000143669	ENSG00000131203	ENSG00000126759	ENSG00000117560	ENSG00000115523	ENSG00000114770	ENSG00000108691	ENSG00000073060	ENSG00000000938
GOTERM_BP_FAT	GO:0009617	response to bacterium	LW	9	ENSG00000158473	ENSG00000136634	ENSG00000133063	ENSG00000115009	ENSG00000100906	ENSG00000089041	ENSG00000075651	ENSG00000069399	ENSG00000010327
GOTERM_BP_FAT	GO:0009617	response to bacterium	TC	5	ENSG00000197471	ENSG00000176153	ENSG00000111537	ENSG00000090382	ENSG00000090376
GOTERM_BP_FAT	GO:0009615	response to virus	common	11	ENSG00000185507	ENSG00000172183	ENSG00000157601	ENSG00000143324	ENSG00000140279	ENSG00000137965	ENSG00000134321	ENSG00000108700	ENSG00000101347	ENSG00000055332	ENSG00000000938
GOTERM_BP_FAT	GO:0009615	response to virus	TC	5	ENSG00000171791	ENSG00000143669	ENSG00000111537	ENSG00000102962	ENSG00000090376
GOTERM_BP_FAT	GO:0009615	response to virus	LW	3	ENSG00000148346	ENSG00000101916	ENSG00000069399
GOTERM_BP_FAT	GO:0007204	elevation of cytosolic calcium ion concentration	common	13	ENSG00000198959	ENSG00000196352	ENSG00000186810	ENSG00000184451	ENSG00000182866	ENSG00000181104	ENSG00000160791	ENSG00000156234	ENSG00000126353	ENSG00000125910	ENSG00000092051	ENSG00000078401	ENSG00000004468
GOTERM_BP_FAT	GO:0007204	elevation of cytosolic calcium ion concentration	LW	2	ENSG00000173198	ENSG00000089041
GOTERM_BP_FAT	GO:0007204	elevation of cytosolic calcium ion concentration	TC	1	ENSG00000173578
GOTERM_BP_FAT	GO:0032496	response to lipopolysaccharide	common	9	ENSG00000185338	ENSG00000181104	ENSG00000170458	ENSG00000147852	ENSG00000131203	ENSG00000117560	ENSG00000114770	ENSG00000108691	ENSG00000073060
GOTERM_BP_FAT	GO:0032496	response to lipopolysaccharide	LW	3	ENSG00000136634	ENSG00000100906	ENSG00000089041
GOTERM_BP_FAT	GO:0032496	response to lipopolysaccharide	TC	1	ENSG00000090376
GOTERM_BP_FAT	GO:0006875	cellular metal ion homeostasis	common	16	ENSG00000198959	ENSG00000196352	ENSG00000186810	ENSG00000184451	ENSG00000182866	ENSG00000181104	ENSG00000160791	ENSG00000156234	ENSG00000154229	ENSG00000126353	ENSG00000125910	ENSG00000108691	ENSG00000092051	ENSG00000087250	ENSG00000078401	ENSG00000004468
GOTERM_BP_FAT	GO:0006875	cellular metal ion homeostasis	LW	6	ENSG00000173198	ENSG00000166598	ENSG00000130203	ENSG00000120915	ENSG00000089041	ENSG00000051382
GOTERM_BP_FAT	GO:0006875	cellular metal ion homeostasis	TC	2	ENSG00000173578	ENSG00000171791
GOTERM_BP_FAT	GO:0043549	regulation of kinase activity	common	19	ENSG00000204209	ENSG00000186827	ENSG00000181104	ENSG00000158050	ENSG00000154229	ENSG00000154096	ENSG00000147852	ENSG00000137193	ENSG00000124145	ENSG00000123975	ENSG00000118971	ENSG00000117152	ENSG00000115355	ENSG00000113328	ENSG00000101255	ENSG00000100151	ENSG00000099860	ENSG00000091436	ENSG00000078401
GOTERM_BP_FAT	GO:0043549	regulation of kinase activity	LW	15	ENSG00000173175	ENSG00000171105	ENSG00000171033	ENSG00000168734	ENSG00000155792	ENSG00000149534	ENSG00000145431	ENSG00000142733	ENSG00000137801	ENSG00000130222	ENSG00000130203	ENSG00000102780	ENSG00000094804	ENSG00000089041	ENSG00000051382
GOTERM_BP_FAT	GO:0043549	regulation of kinase activity	TC	7	ENSG00000160293	ENSG00000158402	ENSG00000149269	ENSG00000145861	ENSG00000113161	ENSG00000090376	ENSG00000067606
GOTERM_BP_FAT	GO:0010595	positive regulation of endothelial cell migration	common	4	ENSG00000112715	ENSG00000078401	ENSG00000073060	ENSG00000061273
GOTERM_BP_FAT	GO:0010595	positive regulation of endothelial cell migration	LW	1	ENSG00000137801
GOTERM_BP_FAT	GO:0010595	positive regulation of endothelial cell migration	TC	0
GOTERM_BP_FAT	GO:0051338	regulation of transferase activity	common	19	ENSG00000204209	ENSG00000186827	ENSG00000181104	ENSG00000158050	ENSG00000154229	ENSG00000154096	ENSG00000147852	ENSG00000137193	ENSG00000124145	ENSG00000123975	ENSG00000118971	ENSG00000117152	ENSG00000115355	ENSG00000113328	ENSG00000101255	ENSG00000100151	ENSG00000099860	ENSG00000091436	ENSG00000078401
GOTERM_BP_FAT	GO:0051338	regulation of transferase activity	LW	16	ENSG00000173175	ENSG00000171105	ENSG00000171033	ENSG00000168734	ENSG00000155792	ENSG00000149534	ENSG00000145431	ENSG00000142733	ENSG00000137801	ENSG00000132170	ENSG00000130222	ENSG00000130203	ENSG00000102780	ENSG00000094804	ENSG00000089041	ENSG00000051382
GOTERM_BP_FAT	GO:0051338	regulation of transferase activity	TC	7	ENSG00000160293	ENSG00000158402	ENSG00000149269	ENSG00000145861	ENSG00000113161	ENSG00000090376	ENSG00000067606
GOTERM_BP_FAT	GO:0006959	humoral immune response	common	8	ENSG00000196352	ENSG00000183918	ENSG00000126759	ENSG00000125730	ENSG00000120885	ENSG00000110777	ENSG00000109743	ENSG00000108691
GOTERM_BP_FAT	GO:0006959	humoral immune response	LW	4	ENSG00000169508	ENSG00000149534	ENSG00000123838	ENSG00000069399
GOTERM_BP_FAT	GO:0006959	humoral immune response	TC	2	ENSG00000171791	ENSG00000095585
GOTERM_BP_FAT	GO:0002253	activation of immune response	common	10	ENSG00000198851	ENSG00000198821	ENSG00000196352	ENSG00000154096	ENSG00000141293	ENSG00000134242	ENSG00000126759	ENSG00000125730	ENSG00000120885	ENSG00000115085
GOTERM_BP_FAT	GO:0002253	activation of immune response	LW	3	ENSG00000172673	ENSG00000123838	ENSG00000100906
GOTERM_BP_FAT	GO:0002253	activation of immune response	TC	1	ENSG00000090376
GOTERM_BP_FAT	GO:0002703	regulation of leukocyte mediated immunity	common	5	ENSG00000183918	ENSG00000168685	ENSG00000150637	ENSG00000125730	ENSG00000073861
GOTERM_BP_FAT	GO:0002703	regulation of leukocyte mediated immunity	LW	5	ENSG00000149534	ENSG00000136634	ENSG00000130202	ENSG00000109943	ENSG00000089041
GOTERM_BP_FAT	GO:0002703	regulation of leukocyte mediated immunity	TC	3	ENSG00000197471	ENSG00000158869	ENSG00000111537
GOTERM_BP_FAT	GO:0030097	hemopoiesis	LW	13	ENSG00000172673	ENSG00000169508	ENSG00000165240	ENSG00000164136	ENSG00000162692	ENSG00000158473	ENSG00000136634	ENSG00000132170	ENSG00000125347	ENSG00000120738	ENSG00000115232	ENSG00000102265	ENSG00000069399
GOTERM_BP_FAT	GO:0030097	hemopoiesis	common	11	ENSG00000198851	ENSG00000182866	ENSG00000168685	ENSG00000167286	ENSG00000153563	ENSG00000143479	ENSG00000134242	ENSG00000115085	ENSG00000112715	ENSG00000100985	ENSG00000067836
GOTERM_BP_FAT	GO:0030097	hemopoiesis	TC	7	ENSG00000197471	ENSG00000171791	ENSG00000164935	ENSG00000158578	ENSG00000157483	ENSG00000150093	ENSG00000095585
GOTERM_BP_FAT	GO:0051251	positive regulation of lymphocyte activation	common	10	ENSG00000198851	ENSG00000186827	ENSG00000182866	ENSG00000168685	ENSG00000154096	ENSG00000139193	ENSG00000115085	ENSG00000110448	ENSG00000073861	ENSG00000004468
GOTERM_BP_FAT	GO:0051251	positive regulation of lymphocyte activation	TC	3	ENSG00000197471	ENSG00000150782	ENSG00000111537
GOTERM_BP_FAT	GO:0051251	positive regulation of lymphocyte activation	LW	3	ENSG00000164136	ENSG00000162692	ENSG00000077238
GOTERM_BP_FAT	GO:0050851	antigen receptor-mediated signaling pathway	common	6	ENSG00000198851	ENSG00000198821	ENSG00000154096	ENSG00000141293	ENSG00000134242	ENSG00000115085
GOTERM_BP_FAT	GO:0050851	antigen receptor-mediated signaling pathway	LW	1	ENSG00000172673
GOTERM_BP_FAT	GO:0050851	antigen receptor-mediated signaling pathway	TC	0
GOTERM_BP_FAT	GO:0016042	lipid catabolic process	common	12	ENSG00000187091	ENSG00000177666	ENSG00000168306	ENSG00000167910	ENSG00000158006	ENSG00000144959	ENSG00000137841	ENSG00000132855	ENSG00000124181	ENSG00000121316	ENSG00000100439	ENSG00000073060
GOTERM_BP_FAT	GO:0016042	lipid catabolic process	LW	7	ENSG00000166819	ENSG00000130203	ENSG00000129219	ENSG00000117215	ENSG00000107798	ENSG00000101670	ENSG00000075651
GOTERM_BP_FAT	GO:0016042	lipid catabolic process	TC	2	ENSG00000166428	ENSG00000025423
GOTERM_BP_FAT	GO:0002706	regulation of lymphocyte mediated immunity	common	5	ENSG00000183918	ENSG00000168685	ENSG00000150637	ENSG00000125730	ENSG00000073861
GOTERM_BP_FAT	GO:0002706	regulation of lymphocyte mediated immunity	LW	4	ENSG00000136634	ENSG00000130202	ENSG00000109943	ENSG00000089041
GOTERM_BP_FAT	GO:0002706	regulation of lymphocyte mediated immunity	TC	3	ENSG00000197471	ENSG00000158869	ENSG00000111537
GOTERM_BP_FAT	GO:0008624	induction of apoptosis by extracellular signals	common	11	ENSG00000204209	ENSG00000198851	ENSG00000196730	ENSG00000163947	ENSG00000156299	ENSG00000154229	ENSG00000134243	ENSG00000132694	ENSG00000117560	ENSG00000110448	ENSG00000004468
GOTERM_BP_FAT	GO:0008624	induction of apoptosis by extracellular signals	TC	3	ENSG00000197471	ENSG00000160293	ENSG00000146192
GOTERM_BP_FAT	GO:0008624	induction of apoptosis by extracellular signals	LW	3	ENSG00000179222	ENSG00000135587	ENSG00000089820
GOTERM_BP_FAT	GO:0002822	regulation of adaptive immune response based on somatic recombination of immune receptors built from immunoglobulin superfamily domains	common	5	ENSG00000168685	ENSG00000150637	ENSG00000131203	ENSG00000125730	ENSG00000073861
GOTERM_BP_FAT	GO:0002822	regulation of adaptive immune response based on somatic recombination of immune receptors built from immunoglobulin superfamily domains	LW	4	ENSG00000136634	ENSG00000130202	ENSG00000089041	ENSG00000077238
GOTERM_BP_FAT	GO:0002822	regulation of adaptive immune response based on somatic recombination of immune receptors built from immunoglobulin superfamily domains	TC	3	ENSG00000197471	ENSG00000158869	ENSG00000111537
GOTERM_BP_FAT	GO:0002697	regulation of immune effector process	common	7	ENSG00000186827	ENSG00000183918	ENSG00000172116	ENSG00000168685	ENSG00000150637	ENSG00000125730	ENSG00000073861
GOTERM_BP_FAT	GO:0002697	regulation of immune effector process	LW	6	ENSG00000164136	ENSG00000149534	ENSG00000136634	ENSG00000130202	ENSG00000109943	ENSG00000089041
GOTERM_BP_FAT	GO:0002697	regulation of immune effector process	TC	4	ENSG00000197471	ENSG00000158869	ENSG00000111537	ENSG00000090376
GOTERM_BP_FAT	GO:0010033	response to organic substance	common	33	ENSG00000188404	ENSG00000185338	ENSG00000181104	ENSG00000180644	ENSG00000171345	ENSG00000170458	ENSG00000162616	ENSG00000161921	ENSG00000154229	ENSG00000147852	ENSG00000145050	ENSG00000141682	ENSG00000140279	ENSG00000139193	ENSG00000137857	ENSG00000134243	ENSG00000131203	ENSG00000120875	ENSG00000120694	ENSG00000118971	ENSG00000118785	ENSG00000117560	ENSG00000114770	ENSG00000110436	ENSG00000109107	ENSG00000108691	ENSG00000105173	ENSG00000104918	ENSG00000102317	ENSG00000073060	ENSG00000070669	ENSG00000055332	ENSG00000004468
GOTERM_BP_FAT	GO:0010033	response to organic substance	LW	24	ENSG00000197594	ENSG00000196396	ENSG00000186469	ENSG00000182670	ENSG00000181284	ENSG00000173175	ENSG00000171105	ENSG00000170145	ENSG00000159388	ENSG00000151726	ENSG00000138795	ENSG00000137801	ENSG00000136634	ENSG00000132170	ENSG00000130203	ENSG00000120833	ENSG00000120738	ENSG00000119729	ENSG00000115884	ENSG00000114166	ENSG00000100906	ENSG00000089041	ENSG00000087074	ENSG00000075651
GOTERM_BP_FAT	GO:0010033	response to organic substance	TC	16	ENSG00000173578	ENSG00000171791	ENSG00000171552	ENSG00000164070	ENSG00000149485	ENSG00000149257	ENSG00000137563	ENSG00000128918	ENSG00000116406	ENSG00000116044	ENSG00000111537	ENSG00000106633	ENSG00000106070	ENSG00000099958	ENSG00000090376	ENSG00000072274
GOTERM_BP_FAT	GO:0002819	regulation of adaptive immune response	LW	8	ENSG00000136634	ENSG00000136634	ENSG00000130202	ENSG00000130202	ENSG00000089041	ENSG00000089041	ENSG00000077238	ENSG00000077238
GOTERM_BP_FAT	GO:0002819	regulation of adaptive immune response	common	5	ENSG00000168685	ENSG00000150637	ENSG00000131203	ENSG00000125730	ENSG00000073861
GOTERM_BP_FAT	GO:0002819	regulation of adaptive immune response	TC	3	ENSG00000197471	ENSG00000158869	ENSG00000111537
GOTERM_BP_FAT	GO:0042127	regulation of cell proliferation	common	35	ENSG00000204305	ENSG00000198959	ENSG00000198851	ENSG00000187098	ENSG00000186827	ENSG00000181104	ENSG00000171310	ENSG00000169245	ENSG00000163586	ENSG00000162772	ENSG00000154229	ENSG00000152894	ENSG00000152804	ENSG00000134954	ENSG00000133661	ENSG00000131203	ENSG00000129521	ENSG00000120885	ENSG00000120217	ENSG00000118971	ENSG00000118849	ENSG00000117090	ENSG00000116478	ENSG00000115355	ENSG00000115085	ENSG00000112715	ENSG00000110448	ENSG00000108691	ENSG00000099985	ENSG00000078401	ENSG00000071246	ENSG00000067836	ENSG00000055332	ENSG00000006747	ENSG00000004468
GOTERM_BP_FAT	GO:0042127	regulation of cell proliferation	LW	26	ENSG00000182871	ENSG00000179222	ENSG00000171105	ENSG00000164136	ENSG00000162692	ENSG00000159388	ENSG00000154640	ENSG00000145431	ENSG00000140105	ENSG00000137801	ENSG00000136634	ENSG00000133639	ENSG00000132170	ENSG00000130203	ENSG00000128340	ENSG00000124813	ENSG00000124783	ENSG00000114166	ENSG00000107779	ENSG00000105472	ENSG00000102265	ENSG00000100906	ENSG00000094804	ENSG00000091136	ENSG00000088992	ENSG00000080503
GOTERM_BP_FAT	GO:0042127	regulation of cell proliferation	TC	14	ENSG00000197471	ENSG00000171791	ENSG00000171552	ENSG00000163599	ENSG00000150782	ENSG00000150093	ENSG00000148516	ENSG00000141655	ENSG00000136826	ENSG00000128918	ENSG00000111537	ENSG00000067606	ENSG00000049249	ENSG00000010278
GOTERM_BP_FAT	GO:0007626	locomotory behavior	common	16	ENSG00000186810	ENSG00000184451	ENSG00000173786	ENSG00000169248	ENSG00000169245	ENSG00000163220	ENSG00000161921	ENSG00000160791	ENSG00000156234	ENSG00000154229	ENSG00000143669	ENSG00000133661	ENSG00000126353	ENSG00000108700	ENSG00000108691	ENSG00000102970
GOTERM_BP_FAT	GO:0007626	locomotory behavior	LW	10	ENSG00000173198	ENSG00000165240	ENSG00000154122	ENSG00000144648	ENSG00000136634	ENSG00000128340	ENSG00000121797	ENSG00000115009	ENSG00000075651	ENSG00000051382
GOTERM_BP_FAT	GO:0007626	locomotory behavior	TC	5	ENSG00000197471	ENSG00000173578	ENSG00000145824	ENSG00000111537	ENSG00000102962
GOTERM_BP_FAT	GO:0050900	leukocyte migration	common	7	ENSG00000163220	ENSG00000161921	ENSG00000154229	ENSG00000143669	ENSG00000133661	ENSG00000108691	ENSG00000091409
GOTERM_BP_FAT	GO:0050900	leukocyte migration	LW	2	ENSG00000162692	ENSG00000136634
GOTERM_BP_FAT	GO:0050900	leukocyte migration	TC	1	ENSG00000111537
GOTERM_BP_FAT	GO:0006793	phosphorus metabolic process	common	46	ENSG00000204209	ENSG00000198355	ENSG00000196730	ENSG00000188906	ENSG00000182866	ENSG00000181104	ENSG00000174292	ENSG00000167601	ENSG00000162302	ENSG00000158050	ENSG00000154310	ENSG00000154229	ENSG00000152894	ENSG00000152495	ENSG00000151689	ENSG00000145632	ENSG00000144959	ENSG00000143851	ENSG00000143776	ENSG00000143479	ENSG00000138166	ENSG00000137193	ENSG00000134242	ENSG00000132334	ENSG00000120875	ENSG00000115085	ENSG00000108691	ENSG00000105287	ENSG00000101665	ENSG00000101255	ENSG00000100151	ENSG00000099985	ENSG00000099860	ENSG00000092445	ENSG00000091436	ENSG00000082074	ENSG00000070759	ENSG00000066455	ENSG00000063761	ENSG00000055332	ENSG00000027075	ENSG00000013725	ENSG00000011405	ENSG00000004799	ENSG00000004660
GOTERM_BP_FAT	GO:0006793	phosphorus metabolic process	LW	27	ENSG00000198900	ENSG00000197594	ENSG00000196396	ENSG00000180817	ENSG00000171105	ENSG00000170145	ENSG00000167588	ENSG00000156194	ENSG00000147853	ENSG00000147044	ENSG00000143507	ENSG00000143322	ENSG00000142733	ENSG00000137801	ENSG00000130222	ENSG00000125388	ENSG00000117266	ENSG00000115170	ENSG00000112655	ENSG00000108798	ENSG00000107779	ENSG00000107140	ENSG00000100503	ENSG00000089041	ENSG00000078061	ENSG00000051382	ENSG00000005882
GOTERM_BP_FAT	GO:0006793	phosphorus metabolic process	TC	15	ENSG00000182578	ENSG00000171791	ENSG00000165264	ENSG00000163545	ENSG00000158402	ENSG00000149269	ENSG00000145861	ENSG00000123131	ENSG00000112425	ENSG00000111537	ENSG00000106633	ENSG00000102096	ENSG00000100749	ENSG00000090376	ENSG00000067606
GOTERM_BP_FAT	GO:0006796	phosphate metabolic process	common	46	ENSG00000204209	ENSG00000198355	ENSG00000196730	ENSG00000188906	ENSG00000182866	ENSG00000181104	ENSG00000174292	ENSG00000167601	ENSG00000162302	ENSG00000158050	ENSG00000154310	ENSG00000154229	ENSG00000152894	ENSG00000152495	ENSG00000151689	ENSG00000145632	ENSG00000144959	ENSG00000143851	ENSG00000143776	ENSG00000143479	ENSG00000138166	ENSG00000137193	ENSG00000134242	ENSG00000132334	ENSG00000120875	ENSG00000115085	ENSG00000108691	ENSG00000105287	ENSG00000101665	ENSG00000101255	ENSG00000100151	ENSG00000099985	ENSG00000099860	ENSG00000092445	ENSG00000091436	ENSG00000082074	ENSG00000070759	ENSG00000066455	ENSG00000063761	ENSG00000055332	ENSG00000027075	ENSG00000013725	ENSG00000011405	ENSG00000004799	ENSG00000004660
GOTERM_BP_FAT	GO:0006796	phosphate metabolic process	LW	27	ENSG00000198900	ENSG00000197594	ENSG00000196396	ENSG00000180817	ENSG00000171105	ENSG00000170145	ENSG00000167588	ENSG00000156194	ENSG00000147853	ENSG00000147044	ENSG00000143507	ENSG00000143322	ENSG00000142733	ENSG00000137801	ENSG00000130222	ENSG00000125388	ENSG00000117266	ENSG00000115170	ENSG00000112655	ENSG00000108798	ENSG00000107779	ENSG00000107140	ENSG00000100503	ENSG00000089041	ENSG00000078061	ENSG00000051382	ENSG00000005882
GOTERM_BP_FAT	GO:0006796	phosphate metabolic process	TC	15	ENSG00000182578	ENSG00000171791	ENSG00000165264	ENSG00000163545	ENSG00000158402	ENSG00000149269	ENSG00000145861	ENSG00000123131	ENSG00000112425	ENSG00000111537	ENSG00000106633	ENSG00000102096	ENSG00000100749	ENSG00000090376	ENSG00000067606
GOTERM_BP_FAT	GO:0002520	immune system development	LW	14	ENSG00000172673	ENSG00000169508	ENSG00000165240	ENSG00000164136	ENSG00000162692	ENSG00000158473	ENSG00000136634	ENSG00000132170	ENSG00000125347	ENSG00000120738	ENSG00000115232	ENSG00000113318	ENSG00000102265	ENSG00000069399
GOTERM_BP_FAT	GO:0002520	immune system development	common	12	ENSG00000198851	ENSG00000182866	ENSG00000168685	ENSG00000167286	ENSG00000156234	ENSG00000153563	ENSG00000143479	ENSG00000134242	ENSG00000115085	ENSG00000112715	ENSG00000100985	ENSG00000067836
GOTERM_BP_FAT	GO:0002520	immune system development	TC	8	ENSG00000197471	ENSG00000171791	ENSG00000164935	ENSG00000158578	ENSG00000157483	ENSG00000150093	ENSG00000141655	ENSG00000095585
GOTERM_BP_FAT	GO:0030595	leukocyte chemotaxis	common	6	ENSG00000163220	ENSG00000161921	ENSG00000154229	ENSG00000143669	ENSG00000133661	ENSG00000108691
GOTERM_BP_FAT	GO:0030595	leukocyte chemotaxis	TC	1	ENSG00000111537
GOTERM_BP_FAT	GO:0030595	leukocyte chemotaxis	LW	1	ENSG00000136634
GOTERM_BP_FAT	GO:0051336	regulation of hydrolase activity	common	22	ENSG00000198959	ENSG00000182866	ENSG00000181104	ENSG00000175463	ENSG00000169860	ENSG00000163586	ENSG00000155463	ENSG00000154096	ENSG00000141682	ENSG00000137841	ENSG00000137834	ENSG00000136111	ENSG00000134243	ENSG00000132855	ENSG00000125910	ENSG00000125875	ENSG00000116641	ENSG00000111490	ENSG00000102445	ENSG00000078401	ENSG00000072818	ENSG00000044574
GOTERM_BP_FAT	GO:0051336	regulation of hydrolase activity	TC	8	ENSG00000198467	ENSG00000167772	ENSG00000146192	ENSG00000142405	ENSG00000140416	ENSG00000131374	ENSG00000111537	ENSG00000067606
GOTERM_BP_FAT	GO:0051336	regulation of hydrolase activity	LW	8	ENSG00000197226	ENSG00000196639	ENSG00000167291	ENSG00000149534	ENSG00000120318	ENSG00000113318	ENSG00000103490	ENSG00000025434
GOTERM_BP_FAT	GO:0050670	regulation of lymphocyte proliferation	common	7	ENSG00000186827	ENSG00000133661	ENSG00000131203	ENSG00000120217	ENSG00000115085	ENSG00000110448	ENSG00000004468
GOTERM_BP_FAT	GO:0050670	regulation of lymphocyte proliferation	TC	4	ENSG00000197471	ENSG00000163599	ENSG00000150782	ENSG00000111537
GOTERM_BP_FAT	GO:0050670	regulation of lymphocyte proliferation	LW	3	ENSG00000164136	ENSG00000162692	ENSG00000136634
GOTERM_BP_FAT	GO:0032101	regulation of response to external stimulus	common	12	ENSG00000204305	ENSG00000198959	ENSG00000181104	ENSG00000171476	ENSG00000154229	ENSG00000136250	ENSG00000131203	ENSG00000125730	ENSG00000118785	ENSG00000112715	ENSG00000099985	ENSG00000078401
GOTERM_BP_FAT	GO:0032101	regulation of response to external stimulus	LW	5	ENSG00000137801	ENSG00000136634	ENSG00000132170	ENSG00000130203	ENSG00000064932
GOTERM_BP_FAT	GO:0032101	regulation of response to external stimulus	TC	4	ENSG00000197471	ENSG00000176153	ENSG00000158869	ENSG00000142405
GOTERM_BP_FAT	GO:0030003	cellular cation homeostasis	common	16	ENSG00000198959	ENSG00000196352	ENSG00000186810	ENSG00000184451	ENSG00000182866	ENSG00000181104	ENSG00000160791	ENSG00000156234	ENSG00000154229	ENSG00000126353	ENSG00000125910	ENSG00000108691	ENSG00000092051	ENSG00000087250	ENSG00000078401	ENSG00000004468
GOTERM_BP_FAT	GO:0030003	cellular cation homeostasis	LW	8	ENSG00000178301	ENSG00000173198	ENSG00000166598	ENSG00000165240	ENSG00000130203	ENSG00000120915	ENSG00000089041	ENSG00000051382
GOTERM_BP_FAT	GO:0030003	cellular cation homeostasis	TC	4	ENSG00000173578	ENSG00000171791	ENSG00000158578	ENSG00000072274
GOTERM_BP_FAT	GO:0030005	cellular di-, tri-valent inorganic cation homeostasis	common	15	ENSG00000198959	ENSG00000196352	ENSG00000186810	ENSG00000184451	ENSG00000182866	ENSG00000181104	ENSG00000160791	ENSG00000156234	ENSG00000154229	ENSG00000126353	ENSG00000125910	ENSG00000108691	ENSG00000092051	ENSG00000078401	ENSG00000004468
GOTERM_BP_FAT	GO:0030005	cellular di-, tri-valent inorganic cation homeostasis	LW	7	ENSG00000173198	ENSG00000166598	ENSG00000165240	ENSG00000130203	ENSG00000120915	ENSG00000089041	ENSG00000051382
GOTERM_BP_FAT	GO:0030005	cellular di-, tri-valent inorganic cation homeostasis	TC	4	ENSG00000173578	ENSG00000171791	ENSG00000158578	ENSG00000072274
GOTERM_BP_FAT	GO:0032944	regulation of mononuclear cell proliferation	common	8	ENSG00000198851	ENSG00000186827	ENSG00000133661	ENSG00000131203	ENSG00000120217	ENSG00000115085	ENSG00000110448	ENSG00000004468
GOTERM_BP_FAT	GO:0032944	regulation of mononuclear cell proliferation	TC	4	ENSG00000197471	ENSG00000163599	ENSG00000150782	ENSG00000111537
GOTERM_BP_FAT	GO:0032944	regulation of mononuclear cell proliferation	LW	3	ENSG00000164136	ENSG00000162692	ENSG00000136634
GOTERM_BP_FAT	GO:0070663	regulation of leukocyte proliferation	common	8	ENSG00000198851	ENSG00000186827	ENSG00000133661	ENSG00000131203	ENSG00000120217	ENSG00000115085	ENSG00000110448	ENSG00000004468
GOTERM_BP_FAT	GO:0070663	regulation of leukocyte proliferation	TC	4	ENSG00000197471	ENSG00000163599	ENSG00000150782	ENSG00000111537
GOTERM_BP_FAT	GO:0070663	regulation of leukocyte proliferation	LW	3	ENSG00000164136	ENSG00000162692	ENSG00000136634
GOTERM_BP_FAT	GO:0007259	JAK-STAT cascade	common	5	ENSG00000204305	ENSG00000185338	ENSG00000181104	ENSG00000108691	ENSG00000099985
GOTERM_BP_FAT	GO:0007259	JAK-STAT cascade	LW	2	ENSG00000123609	ENSG00000120833
GOTERM_BP_FAT	GO:0007259	JAK-STAT cascade	TC	1	ENSG00000111537
GOTERM_BP_FAT	GO:0002429	immune response-activating cell surface receptor signaling pathway	common	6	ENSG00000198851	ENSG00000198821	ENSG00000154096	ENSG00000141293	ENSG00000134242	ENSG00000115085
GOTERM_BP_FAT	GO:0002429	immune response-activating cell surface receptor signaling pathway	LW	1	ENSG00000172673
GOTERM_BP_FAT	GO:0002429	immune response-activating cell surface receptor signaling pathway	TC	0
GOTERM_BP_FAT	GO:0060326	cell chemotaxis	common	6	ENSG00000163220	ENSG00000161921	ENSG00000154229	ENSG00000143669	ENSG00000133661	ENSG00000108691
GOTERM_BP_FAT	GO:0060326	cell chemotaxis	TC	1	ENSG00000111537
GOTERM_BP_FAT	GO:0060326	cell chemotaxis	LW	1	ENSG00000136634
GOTERM_BP_FAT	GO:0006968	cellular defense response	common	7	ENSG00000186827	ENSG00000183918	ENSG00000180644	ENSG00000162894	ENSG00000160791	ENSG00000158517	ENSG00000115523
GOTERM_BP_FAT	GO:0006968	cellular defense response	TC	2	ENSG00000197471	ENSG00000150093
GOTERM_BP_FAT	GO:0006968	cellular defense response	LW	1	ENSG00000163519
GOTERM_BP_FAT	GO:0060191	regulation of lipase activity	common	8	ENSG00000198959	ENSG00000181104	ENSG00000169860	ENSG00000137841	ENSG00000134243	ENSG00000132855	ENSG00000125910	ENSG00000078401
GOTERM_BP_FAT	GO:0060191	regulation of lipase activity	LW	3	ENSG00000196639	ENSG00000149534	ENSG00000025434
GOTERM_BP_FAT	GO:0060191	regulation of lipase activity	TC	2	ENSG00000167772	ENSG00000067606
GOTERM_BP_FAT	GO:0010035	response to inorganic substance	common	11	ENSG00000182132	ENSG00000175567	ENSG00000175564	ENSG00000165272	ENSG00000154229	ENSG00000152894	ENSG00000140279	ENSG00000137857	ENSG00000122986	ENSG00000087250	ENSG00000079215
GOTERM_BP_FAT	GO:0010035	response to inorganic substance	LW	9	ENSG00000171105	ENSG00000165240	ENSG00000158125	ENSG00000138795	ENSG00000137801	ENSG00000130203	ENSG00000115884	ENSG00000100983	ENSG00000089041
GOTERM_BP_FAT	GO:0010035	response to inorganic substance	TC	6	ENSG00000171791	ENSG00000171552	ENSG00000140416	ENSG00000137563	ENSG00000104154	ENSG00000072274
GOTERM_BP_FAT	GO:0002757	immune response-activating signal transduction	common	6	ENSG00000198851	ENSG00000198821	ENSG00000154096	ENSG00000141293	ENSG00000134242	ENSG00000115085
GOTERM_BP_FAT	GO:0002757	immune response-activating signal transduction	LW	2	ENSG00000172673	ENSG00000100906
GOTERM_BP_FAT	GO:0002757	immune response-activating signal transduction	TC	1	ENSG00000090376
GOTERM_BP_FAT	GO:0050727	regulation of inflammatory response	common	6	ENSG00000198959	ENSG00000154229	ENSG00000136250	ENSG00000131203	ENSG00000125730	ENSG00000099985
GOTERM_BP_FAT	GO:0050727	regulation of inflammatory response	TC	4	ENSG00000197471	ENSG00000176153	ENSG00000158869	ENSG00000142405
GOTERM_BP_FAT	GO:0050727	regulation of inflammatory response	LW	4	ENSG00000136634	ENSG00000132170	ENSG00000130203	ENSG00000064932
GOTERM_BP_FAT	GO:0002768	immune response-regulating cell surface receptor signaling pathway	common	6	ENSG00000198851	ENSG00000198821	ENSG00000154096	ENSG00000141293	ENSG00000134242	ENSG00000115085
GOTERM_BP_FAT	GO:0002768	immune response-regulating cell surface receptor signaling pathway	LW	1	ENSG00000172673
GOTERM_BP_FAT	GO:0002768	immune response-regulating cell surface receptor signaling pathway	TC	0
GOTERM_BP_FAT	GO:0007610	behavior	common	24	ENSG00000186810	ENSG00000184451	ENSG00000177963	ENSG00000173786	ENSG00000169248	ENSG00000169245	ENSG00000163220	ENSG00000161921	ENSG00000160791	ENSG00000156234	ENSG00000154229	ENSG00000147852	ENSG00000143669	ENSG00000133661	ENSG00000131203	ENSG00000126353	ENSG00000115896	ENSG00000110436	ENSG00000109189	ENSG00000108700	ENSG00000108691	ENSG00000102970	ENSG00000099985	ENSG00000079215
GOTERM_BP_FAT	GO:0007610	behavior	LW	14	ENSG00000188822	ENSG00000173198	ENSG00000165240	ENSG00000154122	ENSG00000144648	ENSG00000140463	ENSG00000136634	ENSG00000128340	ENSG00000125124	ENSG00000121797	ENSG00000120738	ENSG00000115009	ENSG00000075651	ENSG00000051382
GOTERM_BP_FAT	GO:0007610	behavior	TC	11	ENSG00000197471	ENSG00000173578	ENSG00000171791	ENSG00000162676	ENSG00000150782	ENSG00000145824	ENSG00000113161	ENSG00000112425	ENSG00000111537	ENSG00000102962	ENSG00000067606
GOTERM_BP_FAT	GO:0033273	response to vitamin	common	7	ENSG00000165272	ENSG00000118785	ENSG00000108691	ENSG00000106484	ENSG00000105173	ENSG00000081479	ENSG00000004468
GOTERM_BP_FAT	GO:0033273	response to vitamin	TC	6	ENSG00000171791	ENSG00000149485	ENSG00000136826	ENSG00000128918	ENSG00000104154	ENSG00000072274
GOTERM_BP_FAT	GO:0033273	response to vitamin	LW	2	ENSG00000171105	ENSG00000132170
GOTERM_BP_FAT	GO:0055066	di-, tri-valent inorganic cation homeostasis	common	15	ENSG00000198959	ENSG00000196352	ENSG00000186810	ENSG00000184451	ENSG00000182866	ENSG00000181104	ENSG00000160791	ENSG00000156234	ENSG00000154229	ENSG00000126353	ENSG00000125910	ENSG00000108691	ENSG00000092051	ENSG00000078401	ENSG00000004468
GOTERM_BP_FAT	GO:0055066	di-, tri-valent inorganic cation homeostasis	LW	7	ENSG00000173198	ENSG00000166598	ENSG00000165240	ENSG00000130203	ENSG00000120915	ENSG00000089041	ENSG00000051382
GOTERM_BP_FAT	GO:0055066	di-, tri-valent inorganic cation homeostasis	TC	5	ENSG00000173578	ENSG00000171791	ENSG00000158578	ENSG00000104154	ENSG00000072274
GOTERM_BP_FAT	GO:0007044	cell-substrate junction assembly	common	4	ENSG00000152894	ENSG00000115414	ENSG00000091409	ENSG00000070759
GOTERM_BP_FAT	GO:0007044	cell-substrate junction assembly	TC	1	ENSG00000171791
GOTERM_BP_FAT	GO:0007044	cell-substrate junction assembly	LW	0
GOTERM_BP_FAT	GO:0002764	immune response-regulating signal transduction	common	6	ENSG00000198851	ENSG00000198821	ENSG00000154096	ENSG00000141293	ENSG00000134242	ENSG00000115085
GOTERM_BP_FAT	GO:0002764	immune response-regulating signal transduction	LW	2	ENSG00000172673	ENSG00000100906
GOTERM_BP_FAT	GO:0002764	immune response-regulating signal transduction	TC	1	ENSG00000090376
GOTERM_BP_FAT	GO:0016310	phosphorylation	common	38	ENSG00000204209	ENSG00000198355	ENSG00000196730	ENSG00000188906	ENSG00000182866	ENSG00000181104	ENSG00000174292	ENSG00000167601	ENSG00000162302	ENSG00000154310	ENSG00000154229	ENSG00000152495	ENSG00000145632	ENSG00000143776	ENSG00000143479	ENSG00000137193	ENSG00000132334	ENSG00000115085	ENSG00000108691	ENSG00000105287	ENSG00000101665	ENSG00000101255	ENSG00000100151	ENSG00000099985	ENSG00000099860	ENSG00000092445	ENSG00000091436	ENSG00000082074	ENSG00000070759	ENSG00000066455	ENSG00000063761	ENSG00000055332	ENSG00000027075	ENSG00000013725	ENSG00000011405	ENSG00000004799	ENSG00000004660	ENSG00000000938
GOTERM_BP_FAT	GO:0016310	phosphorylation	LW	21	ENSG00000198900	ENSG00000171105	ENSG00000170145	ENSG00000147853	ENSG00000147044	ENSG00000143322	ENSG00000142733	ENSG00000137801	ENSG00000130222	ENSG00000125388	ENSG00000117266	ENSG00000115170	ENSG00000112655	ENSG00000108798	ENSG00000107779	ENSG00000107140	ENSG00000100503	ENSG00000089041	ENSG00000078061	ENSG00000051382	ENSG00000005882
GOTERM_BP_FAT	GO:0016310	phosphorylation	TC	13	ENSG00000182578	ENSG00000171791	ENSG00000165264	ENSG00000163545	ENSG00000149269	ENSG00000145861	ENSG00000123131	ENSG00000111537	ENSG00000106633	ENSG00000102096	ENSG00000100749	ENSG00000090376	ENSG00000067606
GOTERM_BP_FAT	GO:0031099	regeneration	common	7	ENSG00000185338	ENSG00000167601	ENSG00000109107	ENSG00000108691	ENSG00000105173	ENSG00000081479	ENSG00000038427
GOTERM_BP_FAT	GO:0031099	regeneration	LW	2	ENSG00000132170	ENSG00000122863
GOTERM_BP_FAT	GO:0031099	regeneration	TC	1	ENSG00000171791
GOTERM_BP_FAT	GO:0002712	regulation of B cell mediated immunity	common	3	ENSG00000150637	ENSG00000125730	ENSG00000073861
GOTERM_BP_FAT	GO:0002712	regulation of B cell mediated immunity	TC	2	ENSG00000158869	ENSG00000111537
GOTERM_BP_FAT	GO:0002712	regulation of B cell mediated immunity	LW	2	ENSG00000136634	ENSG00000130202
GOTERM_BP_FAT	GO:0002889	regulation of immunoglobulin mediated immune response	common	3	ENSG00000150637	ENSG00000125730	ENSG00000073861
GOTERM_BP_FAT	GO:0002889	regulation of immunoglobulin mediated immune response	TC	2	ENSG00000158869	ENSG00000111537
GOTERM_BP_FAT	GO:0002889	regulation of immunoglobulin mediated immune response	LW	2	ENSG00000136634	ENSG00000130202
GOTERM_BP_FAT	GO:0045834	positive regulation of lipid metabolic process	common	4	ENSG00000177666	ENSG00000163586	ENSG00000153162	ENSG00000132855
GOTERM_BP_FAT	GO:0045834	positive regulation of lipid metabolic process	TC	3	ENSG00000160293	ENSG00000145861	ENSG00000111537
GOTERM_BP_FAT	GO:0045834	positive regulation of lipid metabolic process	LW	3	ENSG00000132170	ENSG00000130203	ENSG00000025434
GOTERM_BP_FAT	GO:0055074	calcium ion homeostasis	common	15	ENSG00000198959	ENSG00000196352	ENSG00000186810	ENSG00000184451	ENSG00000182866	ENSG00000181104	ENSG00000160791	ENSG00000156234	ENSG00000154229	ENSG00000126353	ENSG00000125910	ENSG00000108691	ENSG00000092051	ENSG00000078401	ENSG00000004468
GOTERM_BP_FAT	GO:0055075	calciumion homeostasis	LW	6	ENSG00000173198	ENSG00000166598	ENSG00000130203	ENSG00000120915	ENSG00000089041	ENSG00000051382
GOTERM_BP_FAT	GO:0055076	calciumion homeostasis	TC	2	ENSG00000173578	ENSG00000171791
GOTERM_BP_FAT	GO:0006874	cellular calcium ion homeostasis	common	15	ENSG00000198959	ENSG00000196352	ENSG00000186810	ENSG00000184451	ENSG00000182866	ENSG00000181104	ENSG00000160791	ENSG00000156234	ENSG00000154229	ENSG00000126353	ENSG00000125910	ENSG00000108691	ENSG00000092051	ENSG00000078401	ENSG00000004468
GOTERM_BP_FAT	GO:0006875	cellular calcium ion homeostasis	LW	6	ENSG00000173198	ENSG00000166598	ENSG00000130203	ENSG00000120915	ENSG00000089041	ENSG00000051382
GOTERM_BP_FAT	GO:0006876	cellular calcium ion homeostasis	TC	2	ENSG00000173578	ENSG00000171791
GOTERM_BP_FAT	GO:0051480	cytosolic calcium ion homeostasis	common	13	ENSG00000198959	ENSG00000196352	ENSG00000186810	ENSG00000184451	ENSG00000182866	ENSG00000181104	ENSG00000160791	ENSG00000156234	ENSG00000126353	ENSG00000125910	ENSG00000092051	ENSG00000078401	ENSG00000004468
GOTERM_BP_FAT	GO:0051481	cytosolic calcium ion homeostasis	LW	2	ENSG00000173198	ENSG00000089041
GOTERM_BP_FAT	GO:0051482	cytosolic calcium ion homeostasis	TC	1	ENSG00000173578
GOTERM_BP_FAT	GO:0048534	hemopoietic or lymphoid organ development	LW	13	ENSG00000172673	ENSG00000169508	ENSG00000165240	ENSG00000164136	ENSG00000162692	ENSG00000158473	ENSG00000136634	ENSG00000132170	ENSG00000125347	ENSG00000120738	ENSG00000115232	ENSG00000102265	ENSG00000069399
GOTERM_BP_FAT	GO:0048535	hemopoietic or lymphoid organ development	common	12	ENSG00000198851	ENSG00000182866	ENSG00000168685	ENSG00000167286	ENSG00000156234	ENSG00000153563	ENSG00000143479	ENSG00000134242	ENSG00000115085	ENSG00000112715	ENSG00000100985	ENSG00000067836
GOTERM_BP_FAT	GO:0048536	hemopoietic or lymphoid organ development	TC	8	ENSG00000197471	ENSG00000171791	ENSG00000164935	ENSG00000158578	ENSG00000157483	ENSG00000150093	ENSG00000141655	ENSG00000095585
GOTERM_BP_FAT	GO:0055065	metal ion homeostasis	common	16	ENSG00000198959	ENSG00000196352	ENSG00000186810	ENSG00000184451	ENSG00000182866	ENSG00000181104	ENSG00000160791	ENSG00000156234	ENSG00000154229	ENSG00000126353	ENSG00000125910	ENSG00000108691	ENSG00000092051	ENSG00000087250	ENSG00000078401	ENSG00000004468
GOTERM_BP_FAT	GO:0055066	metal ion homeostasis	LW	6	ENSG00000173198	ENSG00000166598	ENSG00000130203	ENSG00000120915	ENSG00000089041	ENSG00000051382
GOTERM_BP_FAT	GO:0055067	metal ion homeostasis	TC	2	ENSG00000173578	ENSG00000171791
GOTERM_BP_FAT	GO:0006468	protein amino acid phosphorylation	common	37	ENSG00000204209	ENSG00000198355	ENSG00000196730	ENSG00000188906	ENSG00000182866	ENSG00000181104	ENSG00000174292	ENSG00000167601	ENSG00000162302	ENSG00000154310	ENSG00000154229	ENSG00000152495	ENSG00000145632	ENSG00000143776	ENSG00000143479	ENSG00000137193	ENSG00000132334	ENSG00000115085	ENSG00000108691	ENSG00000105287	ENSG00000101665	ENSG00000101255	ENSG00000100151	ENSG00000099985	ENSG00000099860	ENSG00000092445	ENSG00000091436	ENSG00000082074	ENSG00000070759	ENSG00000066455	ENSG00000063761	ENSG00000055332	ENSG00000027075	ENSG00000013725	ENSG00000004799	ENSG00000004660	ENSG00000000938
GOTERM_BP_FAT	GO:0006469	protein amino acid phosphorylation	LW	19	ENSG00000171105	ENSG00000170145	ENSG00000147044	ENSG00000143322	ENSG00000142733	ENSG00000137801	ENSG00000130222	ENSG00000125388	ENSG00000117266	ENSG00000115170	ENSG00000112655	ENSG00000108798	ENSG00000107779	ENSG00000107140	ENSG00000100503	ENSG00000089041	ENSG00000078061	ENSG00000051382	ENSG00000005882
GOTERM_BP_FAT	GO:0006470	protein amino acid phosphorylation	TC	11	ENSG00000182578	ENSG00000171791	ENSG00000163545	ENSG00000149269	ENSG00000145861	ENSG00000123131	ENSG00000111537	ENSG00000102096	ENSG00000100749	ENSG00000090376	ENSG00000067606
[truncated: 13 more columns]

## Sheet: TC_Specific
Category	num	name	Count	Pvalue	Genes
GOTERM_BP_FAT	GO:0070482	response to oxygen levels	19	5.82e-05	ENSG00000150782	ENSG00000072274	ENSG00000108691	ENSG00000163050	ENSG00000112715	ENSG00000004468	ENSG00000149428	ENSG00000083444	ENSG00000171552	ENSG00000109107	ENSG00000171791	ENSG00000087250	ENSG00000147852	ENSG00000165215	ENSG00000167772	ENSG00000129521	ENSG00000158578	ENSG00000078401	ENSG00000175564
GOTERM_BP_FAT	GO:0033189	response to vitamin A	9	0.000473	ENSG00000072274	ENSG00000136826	ENSG00000104154	ENSG00000081479	ENSG00000128918	ENSG00000165272	ENSG00000004468	ENSG00000149485	ENSG00000106484
GOTERM_BP_FAT	GO:0050729	positive regulation of inflammatory response	7	0.00186389	ENSG00000142405	ENSG00000099985	ENSG00000158869	ENSG00000198959	ENSG00000154229	ENSG00000125730	ENSG00000131203
GOTERM_BP_FAT	GO:0034329	cell junction assembly	8	0.0020819	ENSG00000115414	ENSG00000171791	ENSG00000101665	ENSG00000152894	ENSG00000070759	ENSG00000010278	ENSG00000091409	ENSG00000154096
GOTERM_BP_FAT	GO:0033135	regulation of peptidyl-serine phosphorylation	5	0.0027854	ENSG00000171791	ENSG00000099985	ENSG00000101665	ENSG00000111537	ENSG00000116641
GOTERM_BP_FAT	GO:0055114	oxidation reduction	45	0.0029448	ENSG00000025423	ENSG00000059573	ENSG00000072682	ENSG00000142657	ENSG00000176153	ENSG00000145882	ENSG00000116096	ENSG00000115129	ENSG00000149084	ENSG00000106348	ENSG00000149485	ENSG00000083444	ENSG00000134824	ENSG00000079215	ENSG00000123131	ENSG00000142973	ENSG00000106853	ENSG00000167910	ENSG00000113161	ENSG00000100612	ENSG00000151552	ENSG00000129521	ENSG00000155463	ENSG00000145476	ENSG00000143224	ENSG00000085662	ENSG00000145990	ENSG00000042286	ENSG00000108828	ENSG00000128918	ENSG00000165264	ENSG00000138135	ENSG00000165092	ENSG00000196177	ENSG00000128203	ENSG00000184719	ENSG00000137857	ENSG00000127954	ENSG00000140279	ENSG00000171724	ENSG00000168306	ENSG00000145545	ENSG00000115425	ENSG00000131203	ENSG00000109929
GOTERM_BP_FAT	GO:0002861	regulation of inflammatory response to antigenic stimulus	4	0.00422997	ENSG00000197471	ENSG00000176153	ENSG00000158869	ENSG00000125730
GOTERM_BP_FAT	GO:0006986	response to unfolded protein	10	0.00426936	ENSG00000116044	ENSG00000149257	ENSG00000164070	ENSG00000099958	ENSG00000111537	ENSG00000055332	ENSG00000162616	ENSG00000116406	ENSG00000120694	ENSG00000145050
GOTERM_BP_FAT	GO:0009991	response to extracellular stimulus	20	0.00475795	ENSG00000072274	ENSG00000136826	ENSG00000044574	ENSG00000108691	ENSG00000104154	ENSG00000105173	ENSG00000128918	ENSG00000165272	ENSG00000004468	ENSG00000149485	ENSG00000110436	ENSG00000070669	ENSG00000167601	ENSG00000171791	ENSG00000081479	ENSG00000147852	ENSG00000118785	ENSG00000091409	ENSG00000106484	ENSG00000163545
GOTERM_BP_FAT	GO:0042129	regulation of T cell proliferation	9	0.00619554	ENSG00000120217	ENSG00000115085	ENSG00000150782	ENSG00000197471	ENSG00000163599	ENSG00000111537	ENSG00000131203	ENSG00000133661	ENSG00000198851
GOTERM_BP_FAT	GO:0007160	cell-matrix adhesion	11	0.00635916	ENSG00000150093	ENSG00000115414	ENSG00000171791	ENSG00000152894	ENSG00000139626	ENSG00000082781	ENSG00000116962	ENSG00000132855	ENSG00000070759	ENSG00000091409	ENSG00000154096
GOTERM_BP_FAT	GO:0051147	regulation of muscle cell differentiation	7	0.00728589	ENSG00000076770	ENSG00000171791	ENSG00000116478	ENSG00000081052	ENSG00000171476	ENSG00000148516	ENSG00000078401
GOTERM_BP_FAT	GO:0032103	positive regulation of response to external stimulus	9	0.00750375	ENSG00000142405	ENSG00000204305	ENSG00000099985	ENSG00000112715	ENSG00000158869	ENSG00000198959	ENSG00000154229	ENSG00000125730	ENSG00000131203
GOTERM_BP_FAT	GO:0051789	response to protein stimulus	12	0.00839044	ENSG00000116044	ENSG00000149257	ENSG00000164070	ENSG00000171791	ENSG00000099958	ENSG00000111537	ENSG00000055332	ENSG00000162616	ENSG00000116406	ENSG00000171552	ENSG00000120694	ENSG00000145050
GOTERM_BP_FAT	GO:0033138	positive regulation of peptidyl-serine phosphorylation	4	0.00847555	ENSG00000171791	ENSG00000099985	ENSG00000111537	ENSG00000116641
GOTERM_BP_FAT	GO:0034097	response to cytokine stimulus	10	0.00861371	ENSG00000171791	ENSG00000105173	ENSG00000128918	ENSG00000185338	ENSG00000090376	ENSG00000004468	ENSG00000161921	ENSG00000173578	ENSG00000154229	ENSG00000171552
GOTERM_BP_FAT	GO:0016053	organic acid biosynthetic process	15	0.00981905	ENSG00000059573	ENSG00000138135	ENSG00000083444	ENSG00000149485	ENSG00000135094	ENSG00000079215	ENSG00000134824	ENSG00000070669	ENSG00000135069	ENSG00000116984	ENSG00000115425	ENSG00000164181	ENSG00000131203	ENSG00000078401	ENSG00000109929
GOTERM_BP_FAT	GO:0046394	carboxylic acid biosynthetic process	15	0.00981905	ENSG00000059573	ENSG00000138135	ENSG00000083444	ENSG00000149485	ENSG00000135094	ENSG00000079215	ENSG00000134824	ENSG00000070669	ENSG00000135069	ENSG00000116984	ENSG00000115425	ENSG00000164181	ENSG00000131203	ENSG00000078401	ENSG00000109929
GOTERM_BP_FAT	GO:0007584	response to nutrient	14	0.0101068	ENSG00000072274	ENSG00000108691	ENSG00000136826	ENSG00000104154	ENSG00000105173	ENSG00000128918	ENSG00000165272	ENSG00000004468	ENSG00000149485	ENSG00000171791	ENSG00000081479	ENSG00000147852	ENSG00000118785	ENSG00000106484
GOTERM_BP_FAT	GO:0042149	cellular response to glucose starvation	3	0.0113173	ENSG00000044574	ENSG00000163545	ENSG00000070669
GOTERM_BP_FAT	GO:0008637	apoptotic mitochondrial changes	6	0.0114666	ENSG00000102096	ENSG00000171791	ENSG00000042286	ENSG00000120885	ENSG00000141682	ENSG00000171552
GOTERM_BP_FAT	GO:0002683	negative regulation of immune system process	10	0.011761	ENSG00000120217	ENSG00000197471	ENSG00000163599	ENSG00000176153	ENSG00000090376	ENSG00000160185	ENSG00000131203	ENSG00000133661	ENSG00000168685	ENSG00000154096
GOTERM_BP_FAT	GO:0030029	actin filament-based process	20	0.0121711	ENSG00000150093	ENSG00000137575	ENSG00000067606	ENSG00000006747	ENSG00000050405	ENSG00000102024	ENSG00000100592	ENSG00000158186	ENSG00000171345	ENSG00000125868	ENSG00000171791	ENSG00000136068	ENSG00000146192	ENSG00000143776	ENSG00000157483	ENSG00000140416	ENSG00000132694	ENSG00000070759	ENSG00000163545	ENSG00000163220
GOTERM_BP_FAT	GO:0031589	cell-substrate adhesion	11	0.0122676	ENSG00000150093	ENSG00000115414	ENSG00000171791	ENSG00000152894	ENSG00000139626	ENSG00000082781	ENSG00000116962	ENSG00000132855	ENSG00000070759	ENSG00000091409	ENSG00000154096
GOTERM_BP_FAT	GO:0019221	cytokine-mediated signaling pathway	9	0.0126829	ENSG00000137857	ENSG00000108691	ENSG00000140279	ENSG00000185338	ENSG00000090376	ENSG00000089486	ENSG00000198959	ENSG00000111057	ENSG00000170421
GOTERM_BP_FAT	GO:0030036	actin cytoskeleton organization	19	0.0130614	ENSG00000150093	ENSG00000137575	ENSG00000067606	ENSG00000006747	ENSG00000050405	ENSG00000102024	ENSG00000100592	ENSG00000158186	ENSG00000171345	ENSG00000125868	ENSG00000171791	ENSG00000136068	ENSG00000146192	ENSG00000143776	ENSG00000140416	ENSG00000132694	ENSG00000070759	ENSG00000163545	ENSG00000163220
GOTERM_BP_FAT	GO:0051153	regulation of striated muscle cell differentiation	6	0.0131017	ENSG00000076770	ENSG00000171791	ENSG00000116478	ENSG00000081052	ENSG00000171476	ENSG00000078401
GOTERM_BP_FAT	GO:0032844	regulation of homeostatic process	12	0.0131869	ENSG00000182866	ENSG00000171791	ENSG00000101665	ENSG00000134954	ENSG00000112715	ENSG00000181104	ENSG00000111537	ENSG00000004468	ENSG00000118785	ENSG00000173578	ENSG00000204103	ENSG00000154096
GOTERM_BP_FAT	GO:0034330	cell junction organization	8	0.0132447	ENSG00000115414	ENSG00000171791	ENSG00000101665	ENSG00000152894	ENSG00000070759	ENSG00000010278	ENSG00000091409	ENSG00000154096
GOTERM_BP_FAT	GO:0048585	negative regulation of response to stimulus	11	0.0140119	ENSG00000136250	ENSG00000197471	ENSG00000163599	ENSG00000176153	ENSG00000067606	ENSG00000106070	ENSG00000185338	ENSG00000090376	ENSG00000118785	ENSG00000154229	ENSG00000168685
GOTERM_BP_FAT	GO:0032526	response to retinoic acid	6	0.0148873	ENSG00000072274	ENSG00000136826	ENSG00000081479	ENSG00000165272	ENSG00000004468	ENSG00000106484
GOTERM_BP_FAT	GO:0031667	response to nutrient levels	17	0.0157624	ENSG00000072274	ENSG00000136826	ENSG00000108691	ENSG00000044574	ENSG00000104154	ENSG00000105173	ENSG00000128918	ENSG00000165272	ENSG00000004468	ENSG00000149485	ENSG00000070669	ENSG00000171791	ENSG00000081479	ENSG00000147852	ENSG00000118785	ENSG00000163545	ENSG00000106484
GOTERM_BP_FAT	GO:0048660	regulation of smooth muscle cell proliferation	7	0.0160852	ENSG00000204305	ENSG00000136826	ENSG00000112715	ENSG00000111537	ENSG00000198959	ENSG00000154229	ENSG00000078401
GOTERM_BP_FAT	GO:0045785	positive regulation of cell adhesion	8	0.0172584	ENSG00000101665	ENSG00000067606	ENSG00000116962	ENSG00000140416	ENSG00000118785	ENSG00000149084	ENSG00000198959	ENSG00000091409
GOTERM_BP_FAT	GO:0045061	thymic T cell selection	4	0.0182758	ENSG00000115085	ENSG00000197471	ENSG00000167286	ENSG00000198851
GOTERM_BP_FAT	GO:0002864	regulation of acute inflammatory response to antigenic stimulus	3	0.018305	ENSG00000197471	ENSG00000158869	ENSG00000125730
GOTERM_BP_FAT	GO:0002883	regulation of hypersensitivity	3	0.018305	ENSG00000197471	ENSG00000158869	ENSG00000125730
GOTERM_BP_FAT	GO:0006702	androgen biosynthetic process	3	0.018305	ENSG00000025423	ENSG00000073060	ENSG00000145545
GOTERM_BP_FAT	GO:0051005	negative regulation of lipoprotein lipase activity	3	0.018305	ENSG00000167772	ENSG00000134243	ENSG00000132855
GOTERM_BP_FAT	GO:0006984	ER-nuclear signaling pathway	6	0.0189308	ENSG00000116044	ENSG00000044574	ENSG00000099958	ENSG00000111537	ENSG00000055332	ENSG00000149269
GOTERM_BP_FAT	GO:0051346	negative regulation of hydrolase activity	7	0.0195567	ENSG00000137834	ENSG00000044574	ENSG00000067606	ENSG00000167772	ENSG00000134243	ENSG00000132855	ENSG00000155463
GOTERM_BP_FAT	GO:0008284	positive regulation of cell proliferation	29	0.0197249	ENSG00000118971	ENSG00000099985	ENSG00000112715	ENSG00000004468	ENSG00000171552	ENSG00000198851	ENSG00000171791	ENSG00000163586	ENSG00000181104	ENSG00000116478	ENSG00000117090	ENSG00000169245	ENSG00000078401	ENSG00000204305	ENSG00000150782	ENSG00000115085	ENSG00000150093	ENSG00000186827	ENSG00000108691	ENSG00000197471	ENSG00000067606	ENSG00000162772	ENSG00000128918	ENSG00000111537	ENSG00000198959	ENSG00000067836	ENSG00000141655	ENSG00000120885	ENSG00000154229
GOTERM_BP_FAT	GO:0030155	regulation of cell adhesion	13	0.0200576	ENSG00000150782	ENSG00000197471	ENSG00000101665	ENSG00000067606	ENSG00000149084	ENSG00000198959	ENSG00000171791	ENSG00000115165	ENSG00000116962	ENSG00000118785	ENSG00000140416	ENSG00000091409	ENSG00000163536
GOTERM_BP_FAT	GO:0050870	positive regulation of T cell activation	9	0.0200961	ENSG00000115085	ENSG00000150782	ENSG00000182866	ENSG00000197471	ENSG00000111537	ENSG00000110448	ENSG00000168685	ENSG00000198851	ENSG00000154096
GOTERM_BP_FAT	GO:0048870	cell motility	23	0.0203493	ENSG00000146013	ENSG00000150093	ENSG00000124721	ENSG00000108691	ENSG00000102962	ENSG00000073060	ENSG00000137575	ENSG00000152894	ENSG00000111537	ENSG00000070018	ENSG00000138496	ENSG00000115414	ENSG00000160293	ENSG00000113161	ENSG00000134954	ENSG00000115355	ENSG00000038427	ENSG00000161921	ENSG00000154229	ENSG00000091409	ENSG00000163220	ENSG00000133661	ENSG00000143669
GOTERM_BP_FAT	GO:0051674	localization of cell	23	0.0203493	ENSG00000146013	ENSG00000150093	ENSG00000124721	ENSG00000108691	ENSG00000102962	ENSG00000073060	ENSG00000137575	ENSG00000152894	ENSG00000111537	ENSG00000070018	ENSG00000138496	ENSG00000115414	ENSG00000160293	ENSG00000113161	ENSG00000134954	ENSG00000115355	ENSG00000038427	ENSG00000161921	ENSG00000154229	ENSG00000091409	ENSG00000163220	ENSG00000133661	ENSG00000143669
GOTERM_BP_FAT	GO:0031331	positive regulation of cellular catabolic process	6	0.0211986	ENSG00000102096	ENSG00000163586	ENSG00000101665	ENSG00000109686	ENSG00000177666	ENSG00000111537
GOTERM_BP_FAT	GO:0009896	positive regulation of catabolic process	7	0.02147	ENSG00000102096	ENSG00000163586	ENSG00000101665	ENSG00000109686	ENSG00000177666	ENSG00000111537	ENSG00000132855
GOTERM_BP_FAT	GO:0015718	monocarboxylic acid transport	7	0.0235059	ENSG00000163586	ENSG00000155380	ENSG00000108932	ENSG00000141526	ENSG00000115902	ENSG00000138074	ENSG00000005469
GOTERM_BP_FAT	GO:0016477	cell migration	21	0.0235862	ENSG00000146013	ENSG00000150093	ENSG00000108691	ENSG00000102962	ENSG00000073060	ENSG00000137575	ENSG00000152894	ENSG00000111537	ENSG00000070018	ENSG00000138496	ENSG00000115414	ENSG00000160293	ENSG00000113161	ENSG00000115355	ENSG00000038427	ENSG00000161921	ENSG00000154229	ENSG00000091409	ENSG00000133661	ENSG00000143669	ENSG00000163220
GOTERM_BP_FAT	GO:0031668	cellular response to extracellular stimulus	8	0.0238492	ENSG00000167601	ENSG00000044574	ENSG00000105173	ENSG00000149485	ENSG00000110436	ENSG00000091409	ENSG00000163545	ENSG00000070669
GOTERM_BP_FAT	GO:0045471	response to ethanol	8	0.0238492	ENSG00000180644	ENSG00000139193	ENSG00000118971	ENSG00000171791	ENSG00000108691	ENSG00000105173	ENSG00000137563	ENSG00000154229
GOTERM_BP_FAT	GO:0050777	negative regulation of immune response	5	0.0238493	ENSG00000197471	ENSG00000163599	ENSG00000176153	ENSG00000090376	ENSG00000168685
GOTERM_BP_FAT	GO:0031399	regulation of protein modification process	22	0.024569	ENSG00000118971	ENSG00000099985	ENSG00000101665	ENSG00000067606	ENSG00000013725	ENSG00000111537	ENSG00000185338	ENSG00000149269	ENSG00000188906	ENSG00000198851	ENSG00000137834	ENSG00000142405	ENSG00000015133	ENSG00000185627	ENSG00000171791	ENSG00000091436	ENSG00000115355	ENSG00000204209	ENSG00000116641	ENSG00000154229	ENSG00000151876	ENSG00000078401
GOTERM_BP_FAT	GO:0019318	hexose metabolic process	16	0.0259139	ENSG00000067177	ENSG00000142657	ENSG00000162772	ENSG00000004799	ENSG00000135094	ENSG00000067057	ENSG00000109107	ENSG00000100504	ENSG00000173281	ENSG00000112425	ENSG00000162688	ENSG00000170525	ENSG00000130957	ENSG00000117308	ENSG00000106633	ENSG00000187676
GOTERM_BP_FAT	GO:0007260	tyrosine phosphorylation of STAT protein	3	0.0266494	ENSG00000099985	ENSG00000181104	ENSG00000111537
GOTERM_BP_FAT	GO:0046627	negative regulation of insulin receptor signaling pathway	4	0.0272092	ENSG00000067606	ENSG00000106070	ENSG00000185338	ENSG00000154229
GOTERM_BP_FAT	GO:0046677	response to antibiotic	5	0.0272157	ENSG00000108691	ENSG00000134954	ENSG00000154229	ENSG00000119457	ENSG00000079215
GOTERM_BP_FAT	GO:0044264	cellular polysaccharide metabolic process	7	0.0303774	ENSG00000100504	ENSG00000136250	ENSG00000067177	ENSG00000173281	ENSG00000112425	ENSG00000162688	ENSG00000095380
GOTERM_BP_FAT	GO:0051345	positive regulation of hydrolase activity	15	0.0304448	ENSG00000125910	ENSG00000067606	ENSG00000111537	ENSG00000198959	ENSG00000154096	ENSG00000142405	ENSG00000182866	ENSG00000163586	ENSG00000181104	ENSG00000140416	ENSG00000116641	ENSG00000137841	ENSG00000169860	ENSG00000141682	ENSG00000078401
GOTERM_BP_FAT	GO:0033077	T cell differentiation in the thymus	5	0.0308515	ENSG00000115085	ENSG00000171791	ENSG00000197471	ENSG00000167286	ENSG00000198851
GOTERM_BP_FAT	GO:0042130	negative regulation of T cell proliferation	5	0.0308515	ENSG00000120217	ENSG00000197471	ENSG00000163599	ENSG00000131203	ENSG00000133661
GOTERM_BP_FAT	GO:0048041	focal adhesion formation	4	0.0324	ENSG00000171791	ENSG00000152894	ENSG00000070759	ENSG00000154096
GOTERM_BP_FAT	GO:0055080	cation homeostasis	21	0.0326185	ENSG00000156234	ENSG00000072274	ENSG00000108691	ENSG00000104154	ENSG00000125910	ENSG00000160791	ENSG00000004468	ENSG00000198959	ENSG00000184451	ENSG00000126353	ENSG00000182866	ENSG00000171791	ENSG00000087250	ENSG00000186810	ENSG00000181104	ENSG00000158578	ENSG00000173578	ENSG00000154229	ENSG00000196352	ENSG00000092051	ENSG00000078401
GOTERM_BP_FAT	GO:0006631	fatty acid metabolic process	16	0.0328519	ENSG00000130304	ENSG00000163126	ENSG00000138135	ENSG00000005469	ENSG00000149485	ENSG00000196177	ENSG00000134824	ENSG00000106853	ENSG00000168306	ENSG00000113396	ENSG00000132855	ENSG00000115425	ENSG00000164181	ENSG00000175564	ENSG00000078401	ENSG00000109929
GOTERM_BP_FAT	GO:0055082	cellular chemical homeostasis	26	0.0351658	ENSG00000072274	ENSG00000156234	ENSG00000101665	ENSG00000004468	ENSG00000171552	ENSG00000171791	ENSG00000182866	ENSG00000181104	ENSG00000158578	ENSG00000106633	ENSG00000010278	ENSG00000196352	ENSG00000078401	ENSG00000108691	ENSG00000125910	ENSG00000160791	ENSG00000067606	ENSG00000198959	ENSG00000184451	ENSG00000126353	ENSG00000087250	ENSG00000186810	ENSG00000109062	ENSG00000173578	ENSG00000154229	ENSG00000092051
GOTERM_BP_FAT	GO:0008283	cell proliferation	29	0.0353582	ENSG00000102096	ENSG00000073060	ENSG00000099985	ENSG00000134470	ENSG00000112715	ENSG00000123095	ENSG00000106348	ENSG00000059728	ENSG00000148516	ENSG00000152804	ENSG00000136717	ENSG00000171791	ENSG00000091436	ENSG00000182578	ENSG00000166974	ENSG00000135373	ENSG00000048462	ENSG00000186827	ENSG00000123975	ENSG00000172183	ENSG00000110448	ENSG00000168685	ENSG00000120217	ENSG00000137193	ENSG00000158402	ENSG00000162729	ENSG00000087250	ENSG00000213853	ENSG00000081479
GOTERM_BP_FAT	GO:0048878	chemical homeostasis	33	0.0356091	ENSG00000072274	ENSG00000156234	ENSG00000101665	ENSG00000104154	ENSG00000073060	ENSG00000112715	ENSG00000004468	ENSG00000171552	ENSG00000171791	ENSG00000182866	ENSG00000181104	ENSG00000187838	ENSG00000158578	ENSG00000106633	ENSG00000196352	ENSG00000010278	ENSG00000133661	ENSG00000078401	ENSG00000108691	ENSG00000160791	ENSG00000125910	ENSG00000067606	ENSG00000198959	ENSG00000184451	ENSG00000126353	ENSG00000100504	ENSG00000087250	ENSG00000186810	ENSG00000109062	ENSG00000132855	ENSG00000173578	ENSG00000154229	ENSG00000092051
GOTERM_BP_FAT	GO:0050671	positive regulation of lymphocyte proliferation	7	0.0356197	ENSG00000115085	ENSG00000150782	ENSG00000186827	ENSG00000197471	ENSG00000111537	ENSG00000004468	ENSG00000198851
GOTERM_BP_FAT	GO:0002643	regulation of tolerance induction	3	0.0362154	ENSG00000090376	ENSG00000131203	ENSG00000198851
GOTERM_BP_FAT	GO:0002645	positive regulation of tolerance induction	3	0.0362154	ENSG00000090376	ENSG00000131203	ENSG00000198851
GOTERM_BP_FAT	GO:0060192	negative regulation of lipase activity	3	0.0362154	ENSG00000167772	ENSG00000134243	ENSG00000132855
GOTERM_BP_FAT	GO:0006000	fructose metabolic process	4	0.0380676	ENSG00000170525	ENSG00000130957	ENSG00000067057	ENSG00000109107
GOTERM_BP_FAT	GO:0032946	positive regulation of mononuclear cell proliferation	7	0.0384457	ENSG00000115085	ENSG00000150782	ENSG00000186827	ENSG00000197471	ENSG00000111537	ENSG00000004468	ENSG00000198851
GOTERM_BP_FAT	GO:0070665	positive regulation of leukocyte proliferation	7	0.0384457	ENSG00000115085	ENSG00000150782	ENSG00000186827	ENSG00000197471	ENSG00000111537	ENSG00000004468	ENSG00000198851
GOTERM_BP_FAT	GO:0010517	regulation of phospholipase activity	8	0.0391954	ENSG00000125910	ENSG00000067606	ENSG00000181104	ENSG00000132855	ENSG00000137841	ENSG00000169860	ENSG00000198959	ENSG00000078401
GOTERM_BP_FAT	GO:0005996	monosaccharide metabolic process	17	0.0416445	ENSG00000175040	ENSG00000067177	ENSG00000142657	ENSG00000162772	ENSG00000004799	ENSG00000135094	ENSG00000067057	ENSG00000109107	ENSG00000100504	ENSG00000173281	ENSG00000112425	ENSG00000162688	ENSG00000170525	ENSG00000130957	ENSG00000117308	ENSG00000106633	ENSG00000187676
GOTERM_BP_FAT	GO:0006112	energy reserve metabolic process	6	0.0420164	ENSG00000100504	ENSG00000067177	ENSG00000133116	ENSG00000173281	ENSG00000112425	ENSG00000162688
GOTERM_BP_FAT	GO:0006006	glucose metabolic process	13	0.0421939	ENSG00000067177	ENSG00000142657	ENSG00000162772	ENSG00000004799	ENSG00000135094	ENSG00000067057	ENSG00000109107	ENSG00000100504	ENSG00000173281	ENSG00000112425	ENSG00000162688	ENSG00000130957	ENSG00000106633
GOTERM_BP_FAT	GO:0034614	cellular response to reactive oxygen species	5	0.0433972	ENSG00000137857	ENSG00000140279	ENSG00000087250	ENSG00000152894	ENSG00000140416
GOTERM_BP_FAT	GO:0002228	natural killer cell mediated immunity	3	0.0468772	ENSG00000069974	ENSG00000143669	ENSG00000026751
GOTERM_BP_FAT	GO:0042267	natural killer cell mediated cytotoxicity	3	0.0468772	ENSG00000069974	ENSG00000143669	ENSG00000026751
GOTERM_BP_FAT	GO:0045060	negative thymic T cell selection	3	0.0468772	ENSG00000115085	ENSG00000197471	ENSG00000198851
GOTERM_BP_FAT	GO:0051240	positive regulation of multicellular organismal process	18	0.0475863	ENSG00000150782	ENSG00000108691	ENSG00000067606	ENSG00000111537	ENSG00000004468	ENSG00000170458	ENSG00000079215	ENSG00000142405	ENSG00000153162	ENSG00000133116	ENSG00000171791	ENSG00000181104	ENSG00000158869	ENSG00000081052	ENSG00000118785	ENSG00000140416	ENSG00000131203	ENSG00000078401
GOTERM_BP_FAT	GO:0018130	heterocycle biosynthetic process	7	0.0477624	ENSG00000059573	ENSG00000171723	ENSG00000116096	ENSG00000151552	ENSG00000158578	ENSG00000143224	ENSG00000131203
GOTERM_BP_FAT	GO:0042446	hormone biosynthetic process	5	0.0481277	ENSG00000025423	ENSG00000137857	ENSG00000073060	ENSG00000140279	ENSG00000145545
GOTERM_BP_FAT	GO:0048661	positive regulation of smooth muscle cell proliferation	5	0.0481277	ENSG00000204305	ENSG00000112715	ENSG00000198959	ENSG00000154229	ENSG00000078401
GOTERM_BP_FAT	GO:0006873	cellular ion homeostasis	25	0.0489301	ENSG00000072274	ENSG00000156234	ENSG00000101665	ENSG00000004468	ENSG00000171552	ENSG00000171791	ENSG00000182866	ENSG00000181104	ENSG00000158578	ENSG00000010278	ENSG00000196352	ENSG00000078401	ENSG00000108691	ENSG00000125910	ENSG00000160791	ENSG00000067606	ENSG00000198959	ENSG00000184451	ENSG00000126353	ENSG00000087250	ENSG00000186810	ENSG00000109062	ENSG00000173578	ENSG00000154229	ENSG00000092051
GOTERM_BP_FAT	GO:0042326	negative regulation of phosphorylation	6	0.0496292	ENSG00000142405	ENSG00000137834	ENSG00000101665	ENSG00000067606	ENSG00000185338	ENSG00000154229

## Sheet: LW_Specific
Category	num	name	Count	PValue	Genes
GOTERM_BP_FAT	GO:0045444	fat cell differentiation	11	0.000779	ENSG00000171105	ENSG00000182035	ENSG00000127954	ENSG00000185338	ENSG00000140463	ENSG00000165533	ENSG00000104918	ENSG00000091409	ENSG00000125124	ENSG00000132170	ENSG00000116741
GOTERM_BP_FAT	GO:0048771	tissue remodeling	11	0.00121656	ENSG00000075223	ENSG00000128340	ENSG00000187098	ENSG00000165240	ENSG00000112715	ENSG00000181104	ENSG00000107798	ENSG00000197594	ENSG00000158125	ENSG00000198959	ENSG00000115232
GOTERM_BP_FAT	GO:0010552	positive regulation of specific transcription from RNA polymerase II promoter	11	0.00140069	ENSG00000100906	ENSG00000119729	ENSG00000134954	ENSG00000074964	ENSG00000080503	ENSG00000116478	ENSG00000081189	ENSG00000030419	ENSG00000025434	ENSG00000132170	ENSG00000152804
GOTERM_BP_FAT	GO:0032370	positive regulation of lipid transport	5	0.00261107	ENSG00000100906	ENSG00000101670	ENSG00000130203	ENSG00000089041	ENSG00000025434
GOTERM_BP_FAT	GO:0043193	positive regulation of gene-specific transcription	13	0.00408704	ENSG00000100906	ENSG00000119729	ENSG00000080503	ENSG00000088992	ENSG00000074964	ENSG00000081189	ENSG00000136634	ENSG00000025434	ENSG00000030419	ENSG00000152804	ENSG00000134954	ENSG00000116478	ENSG00000132170
GOTERM_BP_FAT	GO:0032373	positive regulation of sterol transport	4	0.00560935	ENSG00000100906	ENSG00000101670	ENSG00000130203	ENSG00000025434
GOTERM_BP_FAT	GO:0032376	positive regulation of cholesterol transport	4	0.00560935	ENSG00000100906	ENSG00000101670	ENSG00000130203	ENSG00000025434
GOTERM_BP_FAT	GO:0043434	response to peptide hormone stimulus	18	0.00754101	ENSG00000171105	ENSG00000119729	ENSG00000118971	ENSG00000075651	ENSG00000185338	ENSG00000134243	ENSG00000136634	ENSG00000114166	ENSG00000159388	ENSG00000120833	ENSG00000147852	ENSG00000170145	ENSG00000114770	ENSG00000196396	ENSG00000197594	ENSG00000104918	ENSG00000154229	ENSG00000132170
GOTERM_BP_FAT	GO:0030031	cell projection assembly	12	0.00790341	ENSG00000128340	ENSG00000138002	ENSG00000137575	ENSG00000089327	ENSG00000140463	ENSG00000115355	ENSG00000165533	ENSG00000089041	ENSG00000091409	ENSG00000125124	ENSG00000111450	ENSG00000167461
GOTERM_BP_FAT	GO:0006869	lipid transport	17	0.00939783	ENSG00000101670	ENSG00000144909	ENSG00000130304	ENSG00000073060	ENSG00000206190	ENSG00000130203	ENSG00000089041	ENSG00000005469	ENSG00000163586	ENSG00000147852	ENSG00000100979	ENSG00000057252	ENSG00000113396	ENSG00000120885	ENSG00000104783	ENSG00000124406	ENSG00000132170
GOTERM_BP_FAT	GO:0045765	regulation of angiogenesis	10	0.00969018	ENSG00000071246	ENSG00000137801	ENSG00000133639	ENSG00000061273	ENSG00000134871	ENSG00000132855	ENSG00000140105	ENSG00000010327	ENSG00000143878	ENSG00000152804
GOTERM_BP_FAT	GO:0032583	regulation of gene-specific transcription	16	0.0103055	ENSG00000100906	ENSG00000171105	ENSG00000119729	ENSG00000186827	ENSG00000101665	ENSG00000074964	ENSG00000088992	ENSG00000080503	ENSG00000081189	ENSG00000136634	ENSG00000025434	ENSG00000030419	ENSG00000152804	ENSG00000134954	ENSG00000116478	ENSG00000132170
GOTERM_BP_FAT	GO:0043535	regulation of blood vessel endothelial cell migration	5	0.0114353	ENSG00000071246	ENSG00000112715	ENSG00000137801	ENSG00000130203	ENSG00000061273
GOTERM_BP_FAT	GO:0032868	response to insulin stimulus	13	0.0122842	ENSG00000171105	ENSG00000119729	ENSG00000118971	ENSG00000134243	ENSG00000136634	ENSG00000114166	ENSG00000147852	ENSG00000170145	ENSG00000114770	ENSG00000196396	ENSG00000197594	ENSG00000104918	ENSG00000132170
GOTERM_BP_FAT	GO:0001910	regulation of leukocyte mediated cytotoxicity	6	0.0127461	ENSG00000183918	ENSG00000089041	ENSG00000109943	ENSG00000130202	ENSG00000168685	ENSG00000150637
GOTERM_BP_FAT	GO:0009123	nucleoside monophosphate metabolic process	10	0.0130111	ENSG00000173786	ENSG00000061918	ENSG00000113448	ENSG00000147853	ENSG00000133805	ENSG00000128050	ENSG00000106348	ENSG00000069667	ENSG00000188641	ENSG00000173175
GOTERM_BP_FAT	GO:0000303	response to superoxide	4	0.0168859	ENSG00000175567	ENSG00000087250	ENSG00000165240	ENSG00000175564
GOTERM_BP_FAT	GO:0001909	leukocyte mediated cytotoxicity	4	0.0168859	ENSG00000069974	ENSG00000109943	ENSG00000143669	ENSG00000026751
GOTERM_BP_FAT	GO:0050856	regulation of T cell receptor signaling pathway	4	0.0168859	ENSG00000163519	ENSG00000182866	ENSG00000160185	ENSG00000154096
GOTERM_BP_FAT	GO:0046631	alpha-beta T cell activation	5	0.0175453	ENSG00000164136	ENSG00000125347	ENSG00000115085	ENSG00000165240	ENSG00000069399
GOTERM_BP_FAT	GO:0046364	monosaccharide biosynthetic process	7	0.0181141	ENSG00000100504	ENSG00000167588	ENSG00000142657	ENSG00000162772	ENSG00000130957	ENSG00000140263	ENSG00000135094
GOTERM_BP_FAT	GO:0010551	regulation of specific transcription from RNA polymerase II promoter	12	0.0191564	ENSG00000100906	ENSG00000119729	ENSG00000101665	ENSG00000134954	ENSG00000074964	ENSG00000080503	ENSG00000116478	ENSG00000081189	ENSG00000030419	ENSG00000025434	ENSG00000132170	ENSG00000152804
GOTERM_BP_FAT	GO:0018212	peptidyl-tyrosine modification	8	0.0192644	ENSG00000171105	ENSG00000143322	ENSG00000115085	ENSG00000099985	ENSG00000128294	ENSG00000181104	ENSG00000013725	ENSG00000108798
GOTERM_BP_FAT	GO:0031341	regulation of cell killing	6	0.0204566	ENSG00000183918	ENSG00000089041	ENSG00000109943	ENSG00000130202	ENSG00000168685	ENSG00000150637
GOTERM_BP_FAT	GO:0046626	regulation of insulin receptor signaling pathway	5	0.0212336	ENSG00000170145	ENSG00000185338	ENSG00000196396	ENSG00000197594	ENSG00000154229
GOTERM_BP_FAT	GO:0051348	negative regulation of transferase activity	12	0.0220781	ENSG00000099860	ENSG00000168734	ENSG00000171033	ENSG00000130222	ENSG00000130203	ENSG00000101255	ENSG00000155792	ENSG00000117152	ENSG00000158050	ENSG00000154229	ENSG00000154096	ENSG00000132170
GOTERM_BP_FAT	GO:0000305	response to oxygen radical	4	0.022239	ENSG00000175567	ENSG00000087250	ENSG00000165240	ENSG00000175564
GOTERM_BP_FAT	GO:0032570	response to progesterone stimulus	5	0.0253619	ENSG00000108691	ENSG00000105173	ENSG00000137801	ENSG00000185338	ENSG00000004468
GOTERM_BP_FAT	GO:0030500	regulation of bone mineralization	6	0.0269946	ENSG00000153162	ENSG00000107779	ENSG00000154122	ENSG00000089041	ENSG00000197594	ENSG00000115170
GOTERM_BP_FAT	GO:0032368	regulation of lipid transport	6	0.0269946	ENSG00000100906	ENSG00000101670	ENSG00000137801	ENSG00000130203	ENSG00000089041	ENSG00000025434
GOTERM_BP_FAT	GO:0006469	negative regulation of protein kinase activity	11	0.0277484	ENSG00000099860	ENSG00000168734	ENSG00000171033	ENSG00000130222	ENSG00000130203	ENSG00000101255	ENSG00000155792	ENSG00000117152	ENSG00000158050	ENSG00000154229	ENSG00000154096
GOTERM_BP_FAT	GO:0032270	positive regulation of cellular protein metabolic process	22	0.0282853	ENSG00000100906	ENSG00000171105	ENSG00000118971	ENSG00000099985	ENSG00000101665	ENSG00000130203	ENSG00000107779	ENSG00000020577	ENSG00000089041	ENSG00000025434	ENSG00000069399	ENSG00000188906	ENSG00000198851	ENSG00000170473	ENSG00000185627	ENSG00000137801	ENSG00000197548	ENSG00000116641	ENSG00000154229	ENSG00000099377	ENSG00000151876	ENSG00000175063
GOTERM_BP_FAT	GO:0010888	negative regulation of lipid storage	4	0.0284056	ENSG00000100906	ENSG00000177666	ENSG00000025434	ENSG00000132170
GOTERM_BP_FAT	GO:0050854	regulation of antigen receptor-mediated signaling pathway	4	0.0284056	ENSG00000163519	ENSG00000182866	ENSG00000160185	ENSG00000154096
GOTERM_BP_FAT	GO:0006897	endocytosis	21	0.0293435	ENSG00000131477	ENSG00000073060	ENSG00000130203	ENSG00000095066	ENSG00000134243	ENSG00000070018	ENSG00000089041	ENSG00000125388	ENSG00000170458	ENSG00000171365	ENSG00000136717	ENSG00000129219	ENSG00000110047	ENSG00000081479	ENSG00000147852	ENSG00000137801	ENSG00000136854	ENSG00000157191	ENSG00000161921	ENSG00000010327	ENSG00000133661
GOTERM_BP_FAT	GO:0010324	membrane invagination	21	0.0293435	ENSG00000131477	ENSG00000073060	ENSG00000130203	ENSG00000095066	ENSG00000134243	ENSG00000070018	ENSG00000089041	ENSG00000125388	ENSG00000170458	ENSG00000171365	ENSG00000136717	ENSG00000129219	ENSG00000110047	ENSG00000081479	ENSG00000147852	ENSG00000137801	ENSG00000136854	ENSG00000157191	ENSG00000161921	ENSG00000010327	ENSG00000133661
GOTERM_BP_FAT	GO:0007264	small GTPase mediated signal transduction	27	0.0297484	ENSG00000119729	ENSG00000128340	ENSG00000181788	ENSG00000112210	ENSG00000075651	ENSG00000130203	ENSG00000116191	ENSG00000188906	ENSG00000158186	ENSG00000031081	ENSG00000163947	ENSG00000122644	ENSG00000069974	ENSG00000095370	ENSG00000165997	ENSG00000100351	ENSG00000160271	ENSG00000068831	ENSG00000137575	ENSG00000172794	ENSG00000130038	ENSG00000143878	ENSG00000129219	ENSG00000132694	ENSG00000156299	ENSG00000167461	ENSG00000089820
GOTERM_BP_FAT	GO:0001912	positive regulation of leukocyte mediated cytotoxicity	5	0.0299397	ENSG00000183918	ENSG00000089041	ENSG00000109943	ENSG00000130202	ENSG00000150637
GOTERM_BP_FAT	GO:0010883	regulation of lipid storage	5	0.0299397	ENSG00000100906	ENSG00000073060	ENSG00000177666	ENSG00000025434	ENSG00000132170
GOTERM_BP_FAT	GO:0051094	positive regulation of developmental process	25	0.0314652	ENSG00000171105	ENSG00000105173	ENSG00000088992	ENSG00000107779	ENSG00000139193	ENSG00000153162	ENSG00000134954	ENSG00000137801	ENSG00000132170	ENSG00000124813	ENSG00000115085	ENSG00000182035	ENSG00000006747	ENSG00000089041	ENSG00000143878	ENSG00000168685	ENSG00000133639	ENSG00000061273	ENSG00000132855	ENSG00000120885	ENSG00000115170	ENSG00000154229	ENSG00000156299	ENSG00000077238	ENSG00000171476
GOTERM_BP_FAT	GO:0006898	receptor-mediated endocytosis	8	0.0315421	ENSG00000131477	ENSG00000129219	ENSG00000081479	ENSG00000130203	ENSG00000161921	ENSG00000010327	ENSG00000125388	ENSG00000133661
GOTERM_BP_FAT	GO:0046651	lymphocyte proliferation	7	0.0321085	ENSG00000164136	ENSG00000186827	ENSG00000136634	ENSG00000089041	ENSG00000106348	ENSG00000109943	ENSG00000168685
GOTERM_BP_FAT	GO:0006790	sulfur metabolic process	13	0.0331898	ENSG00000175040	ENSG00000104687	ENSG00000122863	ENSG00000196562	ENSG00000197448	ENSG00000102172	ENSG00000128294	ENSG00000198682	ENSG00000124767	ENSG00000197594	ENSG00000116984	ENSG00000100983	ENSG00000171310
GOTERM_BP_FAT	GO:0045860	positive regulation of protein kinase activity	21	0.0332068	ENSG00000171105	ENSG00000142733	ENSG00000102780	ENSG00000118971	ENSG00000149534	ENSG00000089041	ENSG00000173175	ENSG00000100151	ENSG00000099860	ENSG00000145431	ENSG00000137193	ENSG00000124145	ENSG00000130222	ENSG00000147852	ENSG00000137801	ENSG00000181104	ENSG00000091436	ENSG00000115355	ENSG00000204209	ENSG00000051382	ENSG00000078401
GOTERM_BP_FAT	GO:0016192	vesicle-mediated transport	45	0.0336842	ENSG00000120318	ENSG00000073060	ENSG00000005243	ENSG00000051009	ENSG00000095066	ENSG00000130203	ENSG00000138073	ENSG00000074695	ENSG00000070018	ENSG00000125388	ENSG00000170458	ENSG00000100151	ENSG00000171365	ENSG00000135604	ENSG00000136717	ENSG00000110047	ENSG00000137801	ENSG00000136854	ENSG00000070718	ENSG00000099365	ENSG00000069974	ENSG00000157191	ENSG00000129250	ENSG00000161921	ENSG00000010327	ENSG00000177951	ENSG00000133661	ENSG00000131477	ENSG00000108700	ENSG00000134243	ENSG00000006747	ENSG00000089041	ENSG00000066455	ENSG00000143878	ENSG00000113734	ENSG00000152503	ENSG00000184702	ENSG00000092531	ENSG00000129219	ENSG00000081479	ENSG00000147852	ENSG00000104490	ENSG00000111450	ENSG00000143669	ENSG00000167461
GOTERM_BP_FAT	GO:0033673	negative regulation of kinase activity	11	0.0340712	ENSG00000099860	ENSG00000168734	ENSG00000171033	ENSG00000130222	ENSG00000130203	ENSG00000101255	ENSG00000155792	ENSG00000117152	ENSG00000158050	ENSG00000154229	ENSG00000154096
GOTERM_BP_FAT	GO:0016064	immunoglobulin mediated immune response	8	0.0345079	ENSG00000139193	ENSG00000122224	ENSG00000120885	ENSG00000123838	ENSG00000101916	ENSG00000196352	ENSG00000125730	ENSG00000069399
GOTERM_BP_FAT	GO:0045088	regulation of innate immune response	8	0.0345079	ENSG00000100906	ENSG00000101347	ENSG00000183918	ENSG00000109943	ENSG00000130202	ENSG00000101916	ENSG00000158473	ENSG00000150637
GOTERM_BP_FAT	GO:0070167	regulation of biomineral formation	6	0.0347278	ENSG00000153162	ENSG00000107779	ENSG00000154122	ENSG00000089041	ENSG00000197594	ENSG00000115170
GOTERM_BP_FAT	GO:0000165	MAPKKK cascade	18	0.0370193	ENSG00000171105	ENSG00000142733	ENSG00000154310	ENSG00000089041	ENSG00000158050	ENSG00000188906	ENSG00000099860	ENSG00000143507	ENSG00000130222	ENSG00000137801	ENSG00000181104	ENSG00000091436	ENSG00000204209	ENSG00000051382	ENSG00000117152	ENSG00000120875	ENSG00000095370	ENSG00000154229
GOTERM_BP_FAT	GO:0006800	oxygen and reactive oxygen species metabolic process	9	0.0380915	ENSG00000137857	ENSG00000165168	ENSG00000140279	ENSG00000087250	ENSG00000165240	ENSG00000158517	ENSG00000120915	ENSG00000089041	ENSG00000133661
GOTERM_BP_FAT	GO:0022604	regulation of cell morphogenesis	14	0.038982	ENSG00000120318	ENSG00000119729	ENSG00000135622	ENSG00000206190	ENSG00000101665	ENSG00000112715	ENSG00000130203	ENSG00000182670	ENSG00000154096	ENSG00000099260	ENSG00000115414	ENSG00000118785	ENSG00000160007	ENSG00000156299
GOTERM_BP_FAT	GO:0002699	positive regulation of immune effector process	7	0.0392509	ENSG00000183918	ENSG00000149534	ENSG00000089041	ENSG00000109943	ENSG00000130202	ENSG00000125730	ENSG00000150637
GOTERM_BP_FAT	GO:0032943	mononuclear cell proliferation	7	0.0392509	ENSG00000164136	ENSG00000186827	ENSG00000136634	ENSG00000089041	ENSG00000106348	ENSG00000109943	ENSG00000168685
GOTERM_BP_FAT	GO:0042306	regulation of protein import into nucleus	7	0.0392509	ENSG00000100906	ENSG00000168734	ENSG00000139193	ENSG00000171033	ENSG00000107779	ENSG00000136634	ENSG00000069399
GOTERM_BP_FAT	GO:0046165	alcohol biosynthetic process	7	0.0392509	ENSG00000100504	ENSG00000167588	ENSG00000142657	ENSG00000162772	ENSG00000130957	ENSG00000140263	ENSG00000135094
GOTERM_BP_FAT	GO:0070661	leukocyte proliferation	7	0.0392509	ENSG00000164136	ENSG00000186827	ENSG00000136634	ENSG00000089041	ENSG00000106348	ENSG00000109943	ENSG00000168685
GOTERM_BP_FAT	GO:0001974	blood vessel remodeling	5	0.0404675	ENSG00000075223	ENSG00000165240	ENSG00000112715	ENSG00000198959	ENSG00000115232
GOTERM_BP_FAT	GO:0016525	negative regulation of angiogenesis	5	0.0404675	ENSG00000071246	ENSG00000137801	ENSG00000134871	ENSG00000010327	ENSG00000152804
GOTERM_BP_FAT	GO:0045727	positive regulation of translation	5	0.0404675	ENSG00000170473	ENSG00000137801	ENSG00000020577	ENSG00000099377	ENSG00000069399
GOTERM_BP_FAT	GO:0019724	B cell mediated immunity	8	0.0409809	ENSG00000139193	ENSG00000122224	ENSG00000120885	ENSG00000123838	ENSG00000101916	ENSG00000196352	ENSG00000125730	ENSG00000069399
GOTERM_BP_FAT	GO:0032869	cellular response to insulin stimulus	9	0.0410834	ENSG00000171105	ENSG00000119729	ENSG00000118971	ENSG00000147852	ENSG00000170145	ENSG00000196396	ENSG00000197594	ENSG00000114166	ENSG00000132170
GOTERM_BP_FAT	GO:0051247	positive regulation of protein metabolic process	22	0.0417428	ENSG00000100906	ENSG00000171105	ENSG00000118971	ENSG00000099985	ENSG00000101665	ENSG00000130203	ENSG00000107779	ENSG00000020577	ENSG00000089041	ENSG00000025434	ENSG00000069399	ENSG00000188906	ENSG00000198851	ENSG00000170473	ENSG00000185627	ENSG00000137801	ENSG00000197548	ENSG00000116641	ENSG00000154229	ENSG00000099377	ENSG00000151876	ENSG00000175063
GOTERM_BP_FAT	GO:0002855	regulation of natural killer cell mediated immune response to tumor cell	3	0.042646	ENSG00000109943	ENSG00000130202	ENSG00000150637
GOTERM_BP_FAT	GO:0002857	positive regulation of natural killer cell mediated immune response to tumor cell	3	0.042646	ENSG00000109943	ENSG00000130202	ENSG00000150637
GOTERM_BP_FAT	GO:0002858	regulation of natural killer cell mediated cytotoxicity directed against tumor cell target	3	0.042646	ENSG00000109943	ENSG00000130202	ENSG00000150637
GOTERM_BP_FAT	GO:0002860	positive regulation of natural killer cell mediated cytotoxicity directed against tumor cell target	3	0.042646	ENSG00000109943	ENSG00000130202	ENSG00000150637
GOTERM_BP_FAT	GO:0010875	positive regulation of cholesterol efflux	3	0.042646	ENSG00000100906	ENSG00000130203	ENSG00000025434
GOTERM_BP_FAT	GO:0033005	positive regulation of mast cell activation	3	0.042646	ENSG00000149534	ENSG00000130202	ENSG00000150637
GOTERM_BP_FAT	GO:0008333	endosome to lysosome transport	4	0.0431487	ENSG00000051009	ENSG00000095066	ENSG00000134243	ENSG00000143878
GOTERM_BP_FAT	GO:0046632	alpha-beta T cell differentiation	4	0.0431487	ENSG00000125347	ENSG00000115085	ENSG00000165240	ENSG00000069399
GOTERM_BP_FAT	GO:0002705	positive regulation of leukocyte mediated immunity	6	0.0437015	ENSG00000183918	ENSG00000089041	ENSG00000109943	ENSG00000130202	ENSG00000125730	ENSG00000150637
GOTERM_BP_FAT	GO:0002708	positive regulation of lymphocyte mediated immunity	6	0.0437015	ENSG00000183918	ENSG00000089041	ENSG00000109943	ENSG00000130202	ENSG00000125730	ENSG00000150637
GOTERM_BP_FAT	GO:0033674	positive regulation of kinase activity	21	0.0453488	ENSG00000171105	ENSG00000142733	ENSG00000102780	ENSG00000118971	ENSG00000149534	ENSG00000089041	ENSG00000173175	ENSG00000100151	ENSG00000099860	ENSG00000145431	ENSG00000137193	ENSG00000124145	ENSG00000130222	ENSG00000147852	ENSG00000137801	ENSG00000181104	ENSG00000091436	ENSG00000115355	ENSG00000204209	ENSG00000051382	ENSG00000078401
GOTERM_BP_FAT	GO:0070201	regulation of establishment of protein localization	13	0.0462823	ENSG00000100906	ENSG00000168734	ENSG00000119729	ENSG00000186827	ENSG00000171033	ENSG00000107779	ENSG00000136634	ENSG00000089041	ENSG00000069399	ENSG00000139193	ENSG00000103490	ENSG00000109943	ENSG00000104783
GOTERM_BP_FAT	GO:0001906	cell killing	5	0.0464224	ENSG00000069974	ENSG00000115523	ENSG00000109943	ENSG00000143669	ENSG00000026751
GOTERM_BP_FAT	GO:0031343	positive regulation of cell killing	5	0.0464224	ENSG00000183918	ENSG00000089041	ENSG00000109943	ENSG00000130202	ENSG00000150637
GOTERM_BP_FAT	GO:0045778	positive regulation of ossification	5	0.0464224	ENSG00000124813	ENSG00000153162	ENSG00000107779	ENSG00000089041	ENSG00000115170
GOTERM_BP_FAT	GO:0018108	peptidyl-tyrosine phosphorylation	7	0.0473281	ENSG00000171105	ENSG00000143322	ENSG00000115085	ENSG00000099985	ENSG00000181104	ENSG00000013725	ENSG00000108798
GOTERM_BP_FAT	GO:0045089	positive regulation of innate immune response	7	0.0473281	ENSG00000100906	ENSG00000183918	ENSG00000109943	ENSG00000130202	ENSG00000101916	ENSG00000158473	ENSG00000150637
GOTERM_BP_FAT	GO:0044092	negative regulation of molecular function	28	0.0478167	ENSG00000100906	ENSG00000171105	ENSG00000090104	ENSG00000044574	ENSG00000101665	ENSG00000171033	ENSG00000130203	ENSG00000204681	ENSG00000158050	ENSG00000154096	ENSG00000099860	ENSG00000155463	ENSG00000132170	ENSG00000168734	ENSG00000186827	ENSG00000134243	ENSG00000173175	ENSG00000137834	ENSG00000137193	ENSG00000185627	ENSG00000165240	ENSG00000130222	ENSG00000101255	ENSG00000132855	ENSG00000155792	ENSG00000117152	ENSG00000154229	ENSG00000175063
GOTERM_BP_FAT	GO:0016197	endosome transport	8	0.0481954	ENSG00000110047	ENSG00000081479	ENSG00000051009	ENSG00000095066	ENSG00000134243	ENSG00000143878	ENSG00000177951	ENSG00000143669
GOTERM_BP_FAT	GO:0015031	protein transport	56	0.0483553	ENSG00000112210	ENSG00000204764	ENSG00000005243	ENSG00000051009	ENSG00000143416	ENSG00000095066	ENSG00000135338	ENSG00000167705	ENSG00000100575	ENSG00000135604	ENSG00000124783	ENSG00000181104	ENSG00000070718	ENSG00000121621	ENSG00000132170	ENSG00000131477	ENSG00000034693	ENSG00000137575	ENSG00000166598	ENSG00000172794	ENSG00000072818	ENSG00000130038	ENSG00000149534	ENSG00000143878	ENSG00000092531	ENSG00000081479	ENSG00000196860	ENSG00000171659	ENSG00000111450	ENSG00000167461	ENSG00000100906	ENSG00000130204	ENSG00000074695	ENSG00000138073	ENSG00000152969	ENSG00000100151	ENSG00000155660	ENSG00000168010	ENSG00000125967	ENSG00000136854	ENSG00000197548	ENSG00000099365	ENSG00000144559	ENSG00000069974	ENSG00000157191
GOTERM_BP_FAT	GO:0051047	positive regulation of secretion	12	0.0494246	ENSG00000184702	ENSG00000186827	ENSG00000103490	ENSG00000136634	ENSG00000149534	ENSG00000006747	ENSG00000089041	ENSG00000004468	ENSG00000109943	ENSG00000154229	ENSG00000104783	ENSG00000078401
[truncated: 11 more columns]
