# Supplementary material for: Transcriptome Differences in Porcine Alveolar Macrophages from Tongcheng and Large White Pigs in Response to Highly Pathogenic Porcine Reproductive and Respiratory Syndrome Virus (PRRSV) Infection
Source: Int J Mol Sci. 2017 Jul 12;18(7):1475. doi: 10.3390/ijms18071475 (PMC5535966; doi:10.3390/ijms18071475)
Supplement: Supplementary file 1 [file ijms-18-01475-s001.zip › Table S2.xlsx]

## Sheet: Sheet1
Class	KEGG Pathway	LW			KEGG Pathway	TC
		Num	P-value			Num	P-value
Metabolism	Alanin,aspartate and glutamate metabolism	5	0.0291		Alanin,aspartate and glutamate metabolism	6	0.00297
	Arginine and proline metabolism	6	0.019		Biosynthesis of amino acids	8	0.00374
	Glutathione metabolism	6	0.0429		Glycosphingolipid biosynthesis lacto and neolacto series	4	0.0197
	Glycosphingolipid biosynthesis - globo series	4	0.00494
	Glycosphingolipid biosynthesis - ganglio series	3	0.028
Environmental Information Processing	TGF-beta signaling pathway	10	0.00436		TGF-beta signaling pathway	7	0.0385
	Cytokine -cytokine receptor interaction	38	5.69e-12		Cytokine -cytokine receptor interaction	37	9.08e-14
	Sphingolipid signaling pathway	12	0.00872		Cell adhesion molecules (CAMs)	13	0.00592
	TNF signaling pathway	11	0.0168
Cellular Processes	Phagosome	15	0.00552		Phagosome	13	0.00702
	Pheroxisome	9	0.0178		Lysosome	11	0.0088
	Lysosoe	11	0.0301
Organismal Systems	Chemkine signlaing pathway	25	1.05e-06		Chemkine signaling pathway	23	5.29e-07
	T cell receptor signaling pathway	13	0.00183		T cell receptor signaling pathway	11	0.00369
	Antigen processing and presentation	9	0.00492		Antigen processing and presentation	8	0.00548
	Hematopoietic cell lineage	13	0.000168		Hematopoietic cell lineage	9	0.00627
	Intestinal immune network for IgA production	8	0.000955		Intestinal immune network for IgA production	6	0.00734
	Natural killer cell mediated cytotoxicity	10	0.0373		Natural killer cell mediated cytotoxicity	10	0.0121
	NOD-like receptor signaling pathway	8	0.00263
	Cytosolic DNA-sesing pathway	8	0.00905
	PPAR signaling pathway	8	0.0169
Human Diseases	Viral carcinogenesis	18	0.00457		Viral carcinogenesis	17	0.0016
	Transcriptional misregulation in cancer	13	0.039		Transcriptional misregulation in cancer	13	0.0102
	Systemic lupus erythematosus	23	3.22e-10		Systemic lupus erythematosus	19	1.65e-08
	Primary immunodeficiency	8	0.000328		Primary immunodeficiency	8	9.31e-05
	Rheumatocid arthritic	11	0.00317		Rheumatoid arthritic	10	0.00263
	Allograft rejection	6	0.00831		Allograft rejection	6	0.00343
	Graft -versus -host disease	6	0.00543		Graft -versus -host disease	5	0.0113
	Alcoholism	18	0.000187		Alcoholism	16	0.00021
	Type I diabetes mellitus	6	0.0136		Type I diabetes mellitus	5	0.0242
	Measles	14	0.00485		Measles	10	0.042
	Malaria	10	0.000199		Malaria	8	0.00122
	African trypanosomiasis	6	0.00543		African trypanosomiasis	5	0.0113
	Asthma	4	0.0236
	Pertussis	8	0.025
	Chagas disease ( American trypanosomiasis)	11	0.0148
Other and unknow	Glycosaminoglycan biosynthesis -keratan sulfate	4	0.00798		Arginine biosynthesis	3	0.0397
