# Supplementary material for: Transcriptome Differences in Porcine Alveolar Macrophages from Tongcheng and Large White Pigs in Response to Highly Pathogenic Porcine Reproductive and Respiratory Syndrome Virus (PRRSV) Infection
Source: Int J Mol Sci. 2017 Jul 12;18(7):1475. doi: 10.3390/ijms18071475 (PMC5535966; doi:10.3390/ijms18071475)
Supplement: Supplementary file 1 [file ijms-18-01475-s001.zip › Table S3.xlsx]

## Sheet: 工作表1
Category	Term	Count	%	Pvalue	Genes	List Total	Pop Hits	Pop Total	Fold Enrichment	Bonferroni	Benjamini	FDR
GOTERM_CC_DIRECT	GO:0009897~external side of plasma membrane	20	6.28931	3.99661e-12	ENSSSCG00000017466, ENSSSCG00000000641, ENSSSCG00000016832, ENSSSCG00000013115, ENSSSCG00000030900, ENSSSCG00000015092, ENSSSCG00000008217, ENSSSCG00000000705, ENSSSCG00000003513, ENSSSCG00000008977, ENSSSCG00000024344, ENSSSCG00000017283, ENSSSCG00000016122, ENSSSCG00000026591, ENSSSCG00000005211, ENSSSCG00000006287, ENSSSCG00000000653, ENSSSCG00000012402, ENSSSCG00000000481, ENSSSCG00000008213	264	120	12833	8.10164	6.95405e-10	6.95405e-10	4.8949e-09
GOTERM_BP_DIRECT	GO:0006955~immune response	20	6.28931	2.60533e-08	ENSSSCG00000017466, ENSSSCG00000015405, ENSSSCG00000016855, ENSSSCG00000017705, ENSSSCG00000009997, ENSSSCG00000017700, ENSSSCG00000024311, ENSSSCG00000000705, ENSSSCG00000008977, ENSSSCG00000024344, ENSSSCG00000016122, ENSSSCG00000015652, ENSSSCG00000026591, ENSSSCG00000001229, ENSSSCG00000001978, ENSSSCG00000005211, ENSSSCG00000017698, ENSSSCG00000020906, ENSSSCG00000009881, ENSSSCG00000028561	236	198	11368	4.86561	2.69127e-05	2.69127e-05	4.13337e-05
KEGG_PATHWAY	ssc04060:Cytokine-cytokine receptor interaction	21	6.60377	4.62024e-08	ENSSSCG00000017466, ENSSSCG00000016832, ENSSSCG00000008157, ENSSSCG00000017705, ENSSSCG00000021206, ENSSSCG00000009997, ENSSSCG00000017700, ENSSSCG00000024311, ENSSSCG00000028331, ENSSSCG00000000705, ENSSSCG00000008977, ENSSSCG00000024344, ENSSSCG00000015652, ENSSSCG00000029668, ENSSSCG00000026591, ENSSSCG00000007888, ENSSSCG00000020906, ENSSSCG00000017698, ENSSSCG00000017920, ENSSSCG00000012402,…	153	221	7030	4.36607	8.1316e-06	8.1316e-06	5.66961e-05
GOTERM_BP_DIRECT	GO:0051607~defense response to virus	15	4.71698	1.10347e-07	ENSSSCG00000027982, ENSSSCG00000024771, ENSSSCG00000008217, ENSSSCG00000008977, ENSSSCG00000024867, ENSSSCG00000006543, ENSSSCG00000012077, ENSSSCG00000007327, ENSSSCG00000009881, ENSSSCG00000008648, ENSSSCG00000010451, ENSSSCG00000000481, ENSSSCG00000010453, ENSSSCG00000010271, ENSSSCG00000010452	236	116	11368	6.22881	0.000113982	5.69927e-05	0.000175067
GOTERM_BP_DIRECT	GO:0045071~negative regulation of viral genome replication	8	2.51572	2.72805e-07	ENSSSCG00000024867, ENSSSCG00000006543, ENSSSCG00000027982, ENSSSCG00000012077, ENSSSCG00000017705, ENSSSCG00000008648, ENSSSCG00000029879, ENSSSCG00000010453	236	23	11368	16.7546	0.000281768	9.39316e-05	0.000432807
GOTERM_BP_DIRECT	GO:0009615~response to virus	9	2.83019	6.81219e-07	ENSSSCG00000014149, ENSSSCG00000017705, ENSSSCG00000008648, ENSSSCG00000001526, ENSSSCG00000015537, ENSSSCG00000017416, ENSSSCG00000009668, ENSSSCG00000010453, ENSSSCG00000027426	236	37	11368	11.7169	0.000703452	0.000175909	0.00108075
KEGG_PATHWAY	ssc05340:Primary immunodeficiency	9	2.83019	9.01223e-07	ENSSSCG00000015093, ENSSSCG00000003608, ENSSSCG00000016832, ENSSSCG00000025173, ENSSSCG00000025593, ENSSSCG00000020893, ENSSSCG00000015092, ENSSSCG00000008217, ENSSSCG00000008213	153	37	7030	11.1765	0.000158603	7.93045e-05	0.00110591
KEGG_PATHWAY	ssc04640:Hematopoietic cell lineage	12	3.77358	9.76696e-07	ENSSSCG00000015405, ENSSSCG00000014369, ENSSSCG00000015094, ENSSSCG00000022230, ENSSSCG00000015093, ENSSSCG00000016832, ENSSSCG00000013115, ENSSSCG00000017578, ENSSSCG00000015092, ENSSSCG00000008217, ENSSSCG00000028331, ENSSSCG00000008213	153	80	7030	6.89216	0.000171884	5.72979e-05	0.00119852
GOTERM_BP_DIRECT	GO:0071222~cellular response to lipopolysaccharide	9	2.83019	4.64256e-06	ENSSSCG00000008977, ENSSSCG00000024344, ENSSSCG00000000641, ENSSSCG00000016957, ENSSSCG00000014149, ENSSSCG00000015652, ENSSSCG00000000481, ENSSSCG00000016929, ENSSSCG00000008647	236	47	11368	9.22395	0.00478429	0.000958695	0.0073652
GOTERM_BP_DIRECT	GO:0007166~cell surface receptor signaling pathway	14	4.40252	9.34174e-06	ENSSSCG00000015405, ENSSSCG00000022230, ENSSSCG00000029813, ENSSSCG00000015094, ENSSSCG00000006734, ENSSSCG00000015093, ENSSSCG00000006748, ENSSSCG00000015092, ENSSSCG00000008217, ENSSSCG00000017283, ENSSSCG00000016620, ENSSSCG00000005211, ENSSSCG00000012443, ENSSSCG00000020993	236	145	11368	4.65085	0.00960365	0.00160705	0.0148197
GOTERM_BP_DIRECT	GO:0006935~chemotaxis	8	2.51572	1.29099e-05	ENSSSCG00000017466, ENSSSCG00000024344, ENSSSCG00000026591, ENSSSCG00000012443, ENSSSCG00000023868, ENSSSCG00000024311, ENSSSCG00000017700, ENSSSCG00000012402	236	39	11368	9.88092	0.0132475	0.00190333	0.0204797
KEGG_PATHWAY	ssc05162:Measles	13	4.08805	2.52935e-05	ENSSSCG00000015094, ENSSSCG00000015093, ENSSSCG00000002855, ENSSSCG00000006543, ENSSSCG00000012077, ENSSSCG00000029668, ENSSSCG00000030408, ENSSSCG00000020906, ENSSSCG00000009881, ENSSSCG00000015092, ENSSSCG00000000481, ENSSSCG00000012643, ENSSSCG00000028561	153	132	7030	4.52515	0.00444182	0.00111231	0.0310339
GOTERM_BP_DIRECT	GO:0006954~inflammatory response	15	4.71698	3.31258e-05	ENSSSCG00000017466, ENSSSCG00000016957, ENSSSCG00000006748, ENSSSCG00000017705, ENSSSCG00000017700, ENSSSCG00000024311, ENSSSCG00000000705, ENSSSCG00000008977, ENSSSCG00000014369, ENSSSCG00000024344, ENSSSCG00000015652, ENSSSCG00000026591, ENSSSCG00000017698, ENSSSCG00000023868, ENSSSCG00000012402	236	187	11368	3.86386	0.0336407	0.00426831	0.0525415
GOTERM_BP_DIRECT	GO:0030593~neutrophil chemotaxis	7	2.20126	0.000155979	ENSSSCG00000015089, ENSSSCG00000017705, ENSSSCG00000017698, ENSSSCG00000006588, ENSSSCG00000017700, ENSSSCG00000000481, ENSSSCG00000016929	236	40	11368	8.42966	0.148826	0.0177449	0.247175
KEGG_PATHWAY	ssc04660:T cell receptor signaling pathway	10	3.14465	0.000448185	ENSSSCG00000015094, ENSSSCG00000015093, ENSSSCG00000016122, ENSSSCG00000015652, ENSSSCG00000003608, ENSSSCG00000015092, ENSSSCG00000000481, ENSSSCG00000008217, ENSSSCG00000008213, ENSSSCG00000028561	153	106	7030	4.33469	0.0758661	0.0156558	0.548592
GOTERM_BP_DIRECT	GO:0050850~positive regulation of calcium-mediated signaling	4	1.25786	0.000452327	ENSSSCG00000017698, ENSSSCG00000017700, ENSSSCG00000015092, ENSSSCG00000008217	236	8	11368	24.0847	0.373345	0.0456607	0.715214
GOTERM_BP_DIRECT	GO:0050853~B cell receptor signaling pathway	5	1.57233	0.000540343	ENSSSCG00000014149, ENSSSCG00000017283, ENSSSCG00000016122, ENSSSCG00000003608, ENSSSCG00000008742	236	19	11368	12.6762	0.427834	0.0494903	0.853825
GOTERM_BP_DIRECT	GO:0050729~positive regulation of inflammatory response	6	1.88679	0.00070771	ENSSSCG00000017705, ENSSSCG00000017698, ENSSSCG00000030900, ENSSSCG00000006588, ENSSSCG00000017700, ENSSSCG00000015235	236	35	11368	8.25763	0.518728	0.0591237	1.1169
GOTERM_CC_DIRECT	GO:0005615~extracellular space	30	9.43396	0.00095133	ENSSSCG00000029879, ENSSSCG00000010258, ENSSSCG00000017920, ENSSSCG00000017472, ENSSSCG00000006588, ENSSSCG00000001427, ENSSSCG00000005229, ENSSSCG00000013575, ENSSSCG00000017705, ENSSSCG00000004890, ENSSSCG00000015661, ENSSSCG00000009997, ENSSSCG00000017700, ENSSSCG00000021495, ENSSSCG00000017420, ENSSSCG00000012277, ENSSSCG00000008977, ENSSSCG00000001134, ENSSSCG00000007436, ENSSSCG00000000784,…	264	762	12833	1.91377	0.152624	0.0794695	1.15895
GOTERM_BP_DIRECT	GO:0050852~T cell receptor signaling pathway	5	1.57233	0.00097131	ENSSSCG00000003805, ENSSSCG00000017527, ENSSSCG00000015092, ENSSSCG00000000481, ENSSSCG00000016929	236	22	11368	10.9476	0.633535	0.0743132	1.52992
KEGG_PATHWAY	ssc04062:Chemokine signaling pathway	12	3.77358	0.00125189	ENSSSCG00000017466, ENSSSCG00000008977, ENSSSCG00000024344, ENSSSCG00000003578, ENSSSCG00000026591, ENSSSCG00000017705, ENSSSCG00000017698, ENSSSCG00000017920, ENSSSCG00000024311, ENSSSCG00000017700, ENSSSCG00000012402, ENSSSCG00000000175	153	173	7030	3.18712	0.197858	0.0360781	1.52543
GOTERM_BP_DIRECT	GO:0032020~ISG15-protein conjugation	3	0.943396	0.00125921	ENSSSCG00000027982, ENSSSCG00000023379, ENSSSCG00000011393	236	3	11368	48.1695	0.7279	0.0887795	1.97916
GOTERM_BP_DIRECT	GO:0061737~leukotriene signaling pathway	3	0.943396	0.00125921	ENSSSCG00000012443, ENSSSCG00000022427, ENSSSCG00000009399	236	3	11368	48.1695	0.7279	0.0887795	1.97916
GOTERM_BP_DIRECT	GO:0042832~defense response to protozoan	4	1.25786	0.00127282	ENSSSCG00000015652, ENSSSCG00000023178, ENSSSCG00000000481, ENSSSCG00000027426	236	11	11368	17.5162	0.731702	0.0839739	2.00034
GOTERM_BP_DIRECT	GO:0032729~positive regulation of interferon-gamma production	5	1.57233	0.00160005	ENSSSCG00000003805, ENSSSCG00000000641, ENSSSCG00000015092, ENSSSCG00000016929, ENSSSCG00000027426	236	25	11368	9.6339	0.808751	0.0982214	2.50853
GOTERM_MF_DIRECT	GO:0016493~C-C chemokine receptor activity	4	1.25786	0.00197247	ENSSSCG00000017466, ENSSSCG00000024344, ENSSSCG00000026591, ENSSSCG00000024311	223	13	11048	15.2439	0.40856	0.40856	2.55673
GOTERM_CC_DIRECT	GO:0070062~extracellular exosome	50	15.7233	0.00212171	ENSSSCG00000006734, ENSSSCG00000000606, ENSSSCG00000029879, ENSSSCG00000030305, ENSSSCG00000000705, ENSSSCG00000003513, ENSSSCG00000008986, ENSSSCG00000030309, ENSSSCG00000017283, ENSSSCG00000006059, ENSSSCG00000008742, ENSSSCG00000008980, ENSSSCG00000027550, ENSSSCG00000006360, ENSSSCG00000012277, ENSSSCG00000017420, ENSSSCG00000000784, ENSSSCG00000026930, ENSSSCG00000005373, ENSSSCG00000003608,…	264	1590	12833	1.52861	0.308968	0.115904	2.56783
GOTERM_MF_DIRECT	GO:0008310~single-stranded DNA 3'-5' exodeoxyribonuclease activity	3	0.943396	0.00234838	ENSSSCG00000024867, ENSSSCG00000028785, ENSSSCG00000025711	223	4	11048	37.157	0.464954	0.268532	3.03707
GOTERM_MF_DIRECT	GO:0030229~very-low-density lipoprotein particle receptor activity	3	0.943396	0.00234838	ENSSSCG00000005229, ENSSSCG00000030900, ENSSSCG00000003848	223	4	11048	37.157	0.464954	0.268532	3.03707
GOTERM_MF_DIRECT	GO:0015197~peptide transporter activity	3	0.943396	0.00234838	ENSSSCG00000025173, ENSSSCG00000025593, ENSSSCG00000020893	223	4	11048	37.157	0.464954	0.268532	3.03707
GOTERM_CC_DIRECT	GO:0042825~TAP complex	3	0.943396	0.00244307	ENSSSCG00000025173, ENSSSCG00000025593, ENSSSCG00000020893	264	4	12833	36.4574	0.346632	0.100938	2.95144
GOTERM_BP_DIRECT	GO:2000503~positive regulation of natural killer cell chemotaxis	3	0.943396	0.00248406	ENSSSCG00000017705, ENSSSCG00000017698, ENSSSCG00000017700	236	4	11368	36.1271	0.923405	0.140265	3.86905
GOTERM_BP_DIRECT	GO:0010818~T cell chemotaxis	3	0.943396	0.00248406	ENSSSCG00000008977, ENSSSCG00000017920, ENSSSCG00000017700	236	4	11368	36.1271	0.923405	0.140265	3.86905
GOTERM_BP_DIRECT	GO:0019941~modification-dependent protein catabolic process	3	0.943396	0.00248406	ENSSSCG00000027982, ENSSSCG00000023379, ENSSSCG00000011393	236	4	11368	36.1271	0.923405	0.140265	3.86905
GOTERM_BP_DIRECT	GO:0045087~innate immune response	11	3.45912	0.00256294	ENSSSCG00000026803, ENSSSCG00000014369, ENSSSCG00000000641, ENSSSCG00000024867, ENSSSCG00000003608, ENSSSCG00000003578, ENSSSCG00000030408, ENSSSCG00000008648, ENSSSCG00000006588, ENSSSCG00000023578, ENSSSCG00000012643	236	168	11368	3.15395	0.929414	0.136942	3.98958
GOTERM_BP_DIRECT	GO:0045429~positive regulation of nitric oxide biosynthetic process	4	1.25786	0.00268201	ENSSSCG00000000641, ENSSSCG00000024771, ENSSSCG00000000481, ENSSSCG00000009668	236	14	11368	13.7627	0.937603	0.135853	4.17126
KEGG_PATHWAY	ssc04612:Antigen processing and presentation	7	2.20126	0.00288907	ENSSSCG00000000640, ENSSSCG00000025173, ENSSSCG00000025593, ENSSSCG00000020893, ENSSSCG00000000481, ENSSSCG00000008217, ENSSSCG00000008213	153	66	7030	4.87324	0.399031	0.0701618	3.4881
KEGG_PATHWAY	ssc05164:Influenza A	11	3.45912	0.00322386	ENSSSCG00000008977, ENSSSCG00000006543, ENSSSCG00000015114, ENSSSCG00000012077, ENSSSCG00000017705, ENSSSCG00000030408, ENSSSCG00000020906, ENSSSCG00000009881, ENSSSCG00000008648, ENSSSCG00000024771, ENSSSCG00000000481	153	167	7030	3.0265	0.433522	0.068575	3.88499
GOTERM_MF_DIRECT	GO:0015440~peptide-transporting ATPase activity	3	0.943396	0.00386216	ENSSSCG00000025173, ENSSSCG00000025593, ENSSSCG00000020893	223	5	11048	29.7256	0.642751	0.290438	4.94939
GOTERM_MF_DIRECT	GO:0003810~protein-glutamine gamma-glutamyltransferase activity	3	0.943396	0.00386216	ENSSSCG00000001993, ENSSSCG00000023522, ENSSSCG00000024310	223	5	11048	29.7256	0.642751	0.290438	4.94939
GOTERM_CC_DIRECT	GO:0042105~alpha-beta T cell receptor complex	3	0.943396	0.00401675	ENSSSCG00000015094, ENSSSCG00000015093, ENSSSCG00000015092	264	5	12833	29.1659	0.503575	0.130698	4.80999
GOTERM_MF_DIRECT	GO:0008009~chemokine activity	5	1.57233	0.00458662	ENSSSCG00000008977, ENSSSCG00000017705, ENSSSCG00000017698, ENSSSCG00000017920, ENSSSCG00000017700	223	34	11048	7.28568	0.705609	0.263401	5.85219
KEGG_PATHWAY	ssc05168:Herpes simplex infection	11	3.45912	0.00592277	ENSSSCG00000017705, ENSSSCG00000025173, ENSSSCG00000030408, ENSSSCG00000025593, ENSSSCG00000012278, ENSSSCG00000001509, ENSSSCG00000009881, ENSSSCG00000024771, ENSSSCG00000020893, ENSSSCG00000000481, ENSSSCG00000010453	153	182	7030	2.77706	0.648486	0.109674	7.03023
GOTERM_BP_DIRECT	GO:0019722~calcium-mediated signaling	4	1.25786	0.0066163	ENSSSCG00000024344, ENSSSCG00000000784, ENSSSCG00000006059, ENSSSCG00000017700	236	19	11368	10.1409	0.998948	0.290268	9.99608
GOTERM_BP_DIRECT	GO:0048247~lymphocyte chemotaxis	4	1.25786	0.0066163	ENSSSCG00000017705, ENSSSCG00000017698, ENSSSCG00000017920, ENSSSCG00000017700	236	19	11368	10.1409	0.998948	0.290268	9.99608
KEGG_PATHWAY	ssc05330:Allograft rejection	5	1.57233	0.00796862	ENSSSCG00000015652, ENSSSCG00000001978, ENSSSCG00000000481, ENSSSCG00000010271, ENSSSCG00000028561	153	37	7030	6.20915	0.755391	0.131345	9.35112
KEGG_PATHWAY	ssc05142:Chagas disease (American trypanosomiasis)	8	2.51572	0.00826475	ENSSSCG00000015094, ENSSSCG00000015093, ENSSSCG00000015652, ENSSSCG00000017705, ENSSSCG00000024771, ENSSSCG00000017700, ENSSSCG00000015092, ENSSSCG00000000481	153	107	7030	3.43534	0.767912	0.124347	9.68261
GOTERM_BP_DIRECT	GO:0010629~negative regulation of gene expression	6	1.88679	0.00960813	ENSSSCG00000014149, ENSSSCG00000024596, ENSSSCG00000030900, ENSSSCG00000017700, ENSSSCG00000015092, ENSSSCG00000000481	236	63	11368	4.58757	0.999953	0.378061	14.2017
KEGG_PATHWAY	ssc04623:Cytosolic DNA-sensing pathway	6	1.88679	0.0099509	ENSSSCG00000008977, ENSSSCG00000006543, ENSSSCG00000017705, ENSSSCG00000017698, ENSSSCG00000030408, ENSSSCG00000007508	153	61	7030	4.51945	0.827978	0.136428	11.549
GOTERM_BP_DIRECT	GO:0030890~positive regulation of B cell proliferation	4	1.25786	0.0100474	ENSSSCG00000014149, ENSSSCG00000009517, ENSSSCG00000024771, ENSSSCG00000008742	236	22	11368	8.75809	0.999971	0.377591	14.8034
GOTERM_BP_DIRECT	GO:0032760~positive regulation of tumor necrosis factor production	4	1.25786	0.0100474	ENSSSCG00000024771, ENSSSCG00000017700, ENSSSCG00000000481, ENSSSCG00000009668	236	22	11368	8.75809	0.999971	0.377591	14.8034
GOTERM_BP_DIRECT	GO:0048872~homeostasis of number of cells	3	0.943396	0.010975	ENSSSCG00000017466, ENSSSCG00000026591, ENSSSCG00000016832	236	8	11368	18.0636	0.999989	0.390823	16.0612
GOTERM_BP_DIRECT	GO:0071407~cellular response to organic cyclic compound	4	1.25786	0.0128117	ENSSSCG00000017705, ENSSSCG00000011721, ENSSSCG00000011716, ENSSSCG00000017700	236	24	11368	8.02825	0.999998	0.425928	18.5004
GOTERM_BP_DIRECT	GO:0043922~negative regulation by host of viral transcription	3	0.943396	0.0139198	ENSSSCG00000017705, ENSSSCG00000017698, ENSSSCG00000017700	236	9	11368	16.0565	0.999999	0.439658	19.9398
GOTERM_BP_DIRECT	GO:0051928~positive regulation of calcium ion transport	3	0.943396	0.0139198	ENSSSCG00000017705, ENSSSCG00000017698, ENSSSCG00000017700	236	9	11368	16.0565	0.999999	0.439658	19.9398
KEGG_PATHWAY	ssc04622:RIG-I-like receptor signaling pathway	6	1.88679	0.0154668	ENSSSCG00000008977, ENSSSCG00000003729, ENSSSCG00000027982, ENSSSCG00000015114, ENSSSCG00000030408, ENSSSCG00000017416	153	68	7030	4.05421	0.935651	0.190253	17.4099
GOTERM_BP_DIRECT	GO:0097190~apoptotic signaling pathway	4	1.25786	0.0159684	ENSSSCG00000015879, ENSSSCG00000013115, ENSSSCG00000024771, ENSSSCG00000015092	236	26	11368	7.41069	1	0.472473	22.5381
GOTERM_BP_DIRECT	GO:0019731~antibacterial humoral response	3	0.943396	0.0171648	ENSSSCG00000001134, ENSSSCG00000029879, ENSSSCG00000023578	236	10	11368	14.4508	1	0.484395	24.0189
KEGG_PATHWAY	ssc05202:Transcriptional misregulation in cancer	9	2.83019	0.0182024	ENSSSCG00000017466, ENSSSCG00000014369, ENSSSCG00000007436, ENSSSCG00000014149, ENSSSCG00000029668, ENSSSCG00000001978, ENSSSCG00000022111, ENSSSCG00000001561, ENSSSCG00000028331	153	154	7030	2.68526	0.960566	0.206211	20.1822
KEGG_PATHWAY	ssc04610:Complement and coagulation cascades	6	1.88679	0.0193899	ENSSSCG00000007115, ENSSSCG00000023868, ENSSSCG00000015661, ENSSSCG00000000660, ENSSSCG00000001427, ENSSSCG00000024310	153	72	7030	3.82898	0.968132	0.205262	21.3588
GOTERM_CC_DIRECT	GO:0016021~integral component of membrane	94	29.5597	0.0194062	ENSSSCG00000015405, ENSSSCG00000027230, ENSSSCG00000000640, ENSSSCG00000000641, ENSSSCG00000006734, ENSSSCG00000001800, ENSSSCG00000007656, ENSSSCG00000016832, ENSSSCG00000004209, ENSSSCG00000013115, ENSSSCG00000009517, ENSSSCG00000006375, ENSSSCG00000013842, ENSSSCG00000017300, ENSSSCG00000013073, ENSSSCG00000004830, ENSSSCG00000012487, ENSSSCG00000030305, ENSSSCG00000017236, ENSSSCG00000003513,…	264	3767	12833	1.21299	0.966955	0.433519	21.3386
KEGG_PATHWAY	ssc05320:Autoimmune thyroid disease	5	1.57233	0.0224058	ENSSSCG00000016122, ENSSSCG00000015652, ENSSSCG00000001978, ENSSSCG00000010271, ENSSSCG00000028561	153	50	7030	4.59477	0.981468	0.220628	24.2759
GOTERM_MF_DIRECT	GO:0045028~G-protein coupled purinergic nucleotide receptor activity	3	0.943396	0.0232348	ENSSSCG00000012446, ENSSSCG00000011721, ENSSSCG00000011716	223	12	11048	12.3857	0.998076	0.713689	26.5366
GOTERM_BP_DIRECT	GO:0009636~response to toxic substance	4	1.25786	0.0234791	ENSSSCG00000017420, ENSSSCG00000017705, ENSSSCG00000017698, ENSSSCG00000017700	236	30	11368	6.4226	1	0.58378	31.4043
GOTERM_BP_DIRECT	GO:0006334~nucleosome assembly	5	1.57233	0.023653	ENSSSCG00000001134, ENSSSCG00000026930, ENSSSCG00000003483, ENSSSCG00000001137, ENSSSCG00000001509	236	53	11368	4.54429	1	0.57372	31.5978
GOTERM_BP_DIRECT	GO:0060326~cell chemotaxis	5	1.57233	0.023653	ENSSSCG00000008977, ENSSSCG00000017705, ENSSSCG00000017698, ENSSSCG00000023868, ENSSSCG00000017700	236	53	11368	4.54429	1	0.57372	31.5978
GOTERM_MF_DIRECT	GO:0016757~transferase activity, transferring glycosyl groups	4	1.25786	0.0237885	ENSSSCG00000011519, ENSSSCG00000030209, ENSSSCG00000009335, ENSSSCG00000006360	223	31	11048	6.39259	0.998345	0.656088	27.081
KEGG_PATHWAY	ssc05144:Malaria	5	1.57233	0.0254856	ENSSSCG00000015405, ENSSSCG00000000641, ENSSSCG00000007978, ENSSSCG00000015652, ENSSSCG00000000481	153	52	7030	4.41805	0.989365	0.234534	27.1519
GOTERM_BP_DIRECT	GO:0000165~MAPK cascade	4	1.25786	0.0256077	ENSSSCG00000024344, ENSSSCG00000014149, ENSSSCG00000017705, ENSSSCG00000017700	236	31	11368	6.21542	1	0.590674	33.7384
GOTERM_BP_DIRECT	GO:0030968~endoplasmic reticulum unfolded protein response	4	1.25786	0.0256077	ENSSSCG00000015595, ENSSSCG00000002723, ENSSSCG00000000481, ENSSSCG00000007709	236	31	11368	6.21542	1	0.590674	33.7384
KEGG_PATHWAY	ssc00514:Other types of O-glycan biosynthesis	4	1.25786	0.0262571	ENSSSCG00000011519, ENSSSCG00000030209, ENSSSCG00000009335, ENSSSCG00000006360	153	30	7030	6.12636	0.990749	0.229077	27.8565
GOTERM_MF_DIRECT	GO:0000982~transcription factor activity, RNA polymerase II core promoter proximal region sequence-specific binding	3	0.943396	0.0271006	ENSSSCG00000023178, ENSSSCG00000015595, ENSSSCG00000015235	223	13	11048	11.4329	0.99933	0.647969	30.2605
GOTERM_BP_DIRECT	GO:0031295~T cell costimulation	3	0.943396	0.0285671	ENSSSCG00000005211, ENSSSCG00000013115, ENSSSCG00000015092	236	13	11368	11.116	1	0.619319	36.8603
KEGG_PATHWAY	ssc04650:Natural killer cell mediated cytotoxicity	7	2.20126	0.0291652	ENSSSCG00000000641, ENSSSCG00000003608, ENSSSCG00000001978, ENSSSCG00000020906, ENSSSCG00000000481, ENSSSCG00000010271, ENSSSCG00000012643	153	108	7030	2.97809	0.994535	0.239805	30.4564
GOTERM_BP_DIRECT	GO:0070373~negative regulation of ERK1 and ERK2 cascade	4	1.25786	0.0325934	ENSSSCG00000030309, ENSSSCG00000015595, ENSSSCG00000021495, ENSSSCG00000012912	236	34	11368	5.667	1	0.656883	40.8866
GOTERM_MF_DIRECT	GO:0001948~glycoprotein binding	4	1.25786	0.03268	ENSSSCG00000000784, ENSSSCG00000005229, ENSSSCG00000003608, ENSSSCG00000030900	223	35	11048	5.66201	0.999855	0.668711	35.3284
GOTERM_MF_DIRECT	GO:0003723~RNA binding	9	2.83019	0.0347423	ENSSSCG00000017420, ENSSSCG00000006543, ENSSSCG00000028124, ENSSSCG00000007327, ENSSSCG00000010451, ENSSSCG00000007508, ENSSSCG00000010453, ENSSSCG00000008710, ENSSSCG00000010452	223	187	11048	2.3844	0.999918	0.648339	37.1138
GOTERM_BP_DIRECT	GO:0050830~defense response to Gram-positive bacterium	4	1.25786	0.0351206	ENSSSCG00000001134, ENSSSCG00000000641, ENSSSCG00000003578, ENSSSCG00000023578	236	35	11368	5.50508	1	0.673443	43.2895
KEGG_PATHWAY	ssc05332:Graft-versus-host disease	4	1.25786	0.0363651	ENSSSCG00000001978, ENSSSCG00000000481, ENSSSCG00000010271, ENSSSCG00000028561	153	34	7030	5.40561	0.998526	0.278178	36.5273
GOTERM_BP_DIRECT	GO:0090026~positive regulation of monocyte chemotaxis	3	0.943396	0.037432	ENSSSCG00000008977, ENSSSCG00000017705, ENSSSCG00000024311	236	15	11368	9.6339	1	0.686233	45.4069
GOTERM_BP_DIRECT	GO:0018149~peptide cross-linking	3	0.943396	0.037432	ENSSSCG00000001993, ENSSSCG00000023522, ENSSSCG00000024310	236	15	11368	9.6339	1	0.686233	45.4069
GOTERM_BP_DIRECT	GO:0048662~negative regulation of smooth muscle cell proliferation	3	0.943396	0.037432	ENSSSCG00000030309, ENSSSCG00000000481, ENSSSCG00000023578	236	15	11368	9.6339	1	0.686233	45.4069
GOTERM_CC_DIRECT	GO:0009986~cell surface	11	3.45912	0.0392599	ENSSSCG00000000641, ENSSSCG00000007115, ENSSSCG00000004209, ENSSSCG00000011721, ENSSSCG00000006375, ENSSSCG00000029879, ENSSSCG00000030900, ENSSSCG00000013777, ENSSSCG00000008742, ENSSSCG00000015453, ENSSSCG00000009668	264	257	12833	2.08058	0.999059	0.630484	38.7703
GOTERM_BP_DIRECT	GO:0030154~cell differentiation	7	2.20126	0.0394936	ENSSSCG00000026803, ENSSSCG00000000641, ENSSSCG00000000606, ENSSSCG00000003578, ENSSSCG00000001561, ENSSSCG00000015235, ENSSSCG00000023578	236	121	11368	2.78666	1	0.695556	47.2327
GOTERM_MF_DIRECT	GO:0016301~kinase activity	5	1.57233	0.0395289	ENSSSCG00000000784, ENSSSCG00000002855, ENSSSCG00000022111, ENSSSCG00000001573, ENSSSCG00000017700	223	64	11048	3.87052	0.999978	0.657956	41.0838
GOTERM_MF_DIRECT	GO:0003726~double-stranded RNA adenosine deaminase activity	2	0.628931	0.0397863	ENSSSCG00000006543, ENSSSCG00000007508	223	2	11048	49.5426	0.99998	0.625352	41.2906
GOTERM_BP_DIRECT	GO:0070098~chemokine-mediated signaling pathway	4	1.25786	0.0404691	ENSSSCG00000008977, ENSSSCG00000017705, ENSSSCG00000017698, ENSSSCG00000017700	236	37	11368	5.20751	1	0.694373	48.0765
GOTERM_BP_DIRECT	GO:0036413~histone H3-R26 citrullination	2	0.628931	0.0409186	ENSSSCG00000003483, ENSSSCG00000026478	236	2	11368	48.1695	1	0.688524	48.461
GOTERM_BP_DIRECT	GO:0019732~antifungal humoral response	2	0.628931	0.0409186	ENSSSCG00000029879, ENSSSCG00000023578	236	2	11368	48.1695	1	0.688524	48.461
GOTERM_BP_DIRECT	GO:0014066~regulation of phosphatidylinositol 3-kinase signaling	2	0.628931	0.0409186	ENSSSCG00000026655, ENSSSCG00000007350	236	2	11368	48.1695	1	0.688524	48.461
GOTERM_BP_DIRECT	GO:0042742~defense response to bacterium	5	1.57233	0.0410885	ENSSSCG00000027982, ENSSSCG00000015652, ENSSSCG00000009240, ENSSSCG00000000481, ENSSSCG00000027426	236	63	11368	3.82298	1	0.680358	48.6057
GOTERM_CC_DIRECT	GO:0031234~extrinsic component of cytoplasmic side of plasma membrane	4	1.25786	0.0452613	ENSSSCG00000026803, ENSSSCG00000003608, ENSSSCG00000003578, ENSSSCG00000022427	264	39	12833	4.98563	0.999684	0.634836	43.2937
GOTERM_BP_DIRECT	GO:0007200~phospholipase C-activating G-protein coupled receptor signaling pathway	4	1.25786	0.0492142	ENSSSCG00000012443, ENSSSCG00000011721, ENSSSCG00000023868, ENSSSCG00000009399	236	40	11368	4.81695	1	0.737293	55.0965
GOTERM_MF_DIRECT	GO:0003950~NAD+ ADP-ribosyltransferase activity	3	0.943396	0.0497938	ENSSSCG00000011874, ENSSSCG00000027709, ENSSSCG00000000728	223	18	11048	8.2571	0.999999	0.677674	48.8292
GOTERM_MF_DIRECT	GO:0048020~CCR chemokine receptor binding	3	0.943396	0.0497938	ENSSSCG00000017705, ENSSSCG00000017698, ENSSSCG00000017700	223	18	11048	8.2571	0.999999	0.677674	48.8292
GOTERM_BP_DIRECT	GO:0032436~positive regulation of proteasomal ubiquitin-dependent protein catabolic process	4	1.25786	0.0523178	ENSSSCG00000004507, ENSSSCG00000003729, ENSSSCG00000000784, ENSSSCG00000009668	236	41	11368	4.69946	1	0.750359	57.3664
GOTERM_BP_DIRECT	GO:0031663~lipopolysaccharide-mediated signaling pathway	3	0.943396	0.0523898	ENSSSCG00000017705, ENSSSCG00000024771, ENSSSCG00000017700	236	18	11368	8.02825	1	0.742259	57.4177
GOTERM_MF_DIRECT	GO:0005525~GTP binding	11	3.45912	0.0541413	ENSSSCG00000008986, ENSSSCG00000026022, ENSSSCG00000000784, ENSSSCG00000012077, ENSSSCG00000003763, ENSSSCG00000004612, ENSSSCG00000007800, ENSSSCG00000014618, ENSSSCG00000006923, ENSSSCG00000006924, ENSSSCG00000010128	223	278	11048	1.96032	1	0.679839	51.8167
GOTERM_BP_DIRECT	GO:2001244~positive regulation of intrinsic apoptotic signaling pathway	3	0.943396	0.0577749	ENSSSCG00000003608, ENSSSCG00000006588, ENSSSCG00000009668	236	19	11368	7.60571	1	0.768619	61.0989
KEGG_PATHWAY	ssc04940:Type I diabetes mellitus	4	1.25786	0.0581365	ENSSSCG00000001978, ENSSSCG00000000481, ENSSSCG00000010271, ENSSSCG00000028561	153	41	7030	4.4827	0.999974	0.394667	52.0487
KEGG_PATHWAY	ssc05322:Systemic lupus erythematosus	6	1.88679	0.0584976	ENSSSCG00000001134, ENSSSCG00000026930, ENSSSCG00000015652, ENSSSCG00000000481, ENSSSCG00000001427, ENSSSCG00000028561	153	97	7030	2.84213	0.999975	0.382593	52.2739
GOTERM_MF_DIRECT	GO:0001631~cysteinyl leukotriene receptor activity	2	0.628931	0.0590844	ENSSSCG00000012443, ENSSSCG00000009399	223	3	11048	33.0284	1	0.685615	55.0173
GOTERM_MF_DIRECT	GO:0016004~phospholipase activator activity	2	0.628931	0.0590844	ENSSSCG00000017705, ENSSSCG00000017700	223	3	11048	33.0284	1	0.685615	55.0173
GOTERM_BP_DIRECT	GO:0039536~negative regulation of RIG-I signaling pathway	2	0.628931	0.0607483	ENSSSCG00000015114, ENSSSCG00000017416	236	3	11368	32.113	1	0.778111	63.0015
GOTERM_BP_DIRECT	GO:0070100~negative regulation of chemokine-mediated signaling pathway	2	0.628931	0.0607483	ENSSSCG00000026478, ENSSSCG00000017705	236	3	11368	32.113	1	0.778111	63.0015
GOTERM_BP_DIRECT	GO:0032649~regulation of interferon-gamma production	2	0.628931	0.0607483	ENSSSCG00000017466, ENSSSCG00000027982	236	3	11368	32.113	1	0.778111	63.0015
KEGG_PATHWAY	ssc02010:ABC transporters	4	1.25786	0.0652655	ENSSSCG00000011782, ENSSSCG00000025173, ENSSSCG00000025593, ENSSSCG00000020893	153	43	7030	4.27421	0.999993	0.403375	56.3174
KEGG_PATHWAY	ssc04620:Toll-like receptor signaling pathway	6	1.88679	0.0672317	ENSSSCG00000008977, ENSSSCG00000014369, ENSSSCG00000017705, ENSSSCG00000017698, ENSSSCG00000024771, ENSSSCG00000017700	153	101	7030	2.72957	0.999995	0.399738	57.4317
GOTERM_BP_DIRECT	GO:0050873~brown fat cell differentiation	3	0.943396	0.0690828	ENSSSCG00000009240, ENSSSCG00000013514, ENSSSCG00000010806	236	21	11368	6.88136	1	0.813741	67.8803
GOTERM_CC_DIRECT	GO:0005783~endoplasmic reticulum	13	4.08805	0.0696646	ENSSSCG00000013595, ENSSSCG00000029186, ENSSSCG00000025901, ENSSSCG00000015453, ENSSSCG00000004830, ENSSSCG00000000784, ENSSSCG00000022912, ENSSSCG00000023522, ENSSSCG00000008803, ENSSSCG00000011716, ENSSSCG00000008648, ENSSSCG00000007709, ENSSSCG00000009668	264	362	12833	1.74566	0.999997	0.75243	58.7042
KEGG_PATHWAY	ssc05133:Pertussis	5	1.57233	0.0727437	ENSSSCG00000014369, ENSSSCG00000015652, ENSSSCG00000024771, ENSSSCG00000015661, ENSSSCG00000001427	153	73	7030	3.1471	0.999998	0.412394	60.4177
GOTERM_BP_DIRECT	GO:0007346~regulation of mitotic cell cycle	3	0.943396	0.0749863	ENSSSCG00000022111, ENSSSCG00000001573, ENSSSCG00000006237	236	22	11368	6.56857	1	0.832925	70.9639
GOTERM_MF_DIRECT	GO:0016817~hydrolase activity, acting on acid anhydrides	2	0.628931	0.0779965	ENSSSCG00000030408, ENSSSCG00000017416	223	4	11048	24.7713	1	0.763086	65.5354
GOTERM_BP_DIRECT	GO:0070723~response to cholesterol	2	0.628931	0.0801696	ENSSSCG00000024344, ENSSSCG00000017700	236	4	11368	24.0847	1	0.846891	73.4405
GOTERM_BP_DIRECT	GO:0030889~negative regulation of B cell proliferation	2	0.628931	0.0801696	ENSSSCG00000016122, ENSSSCG00000015652	236	4	11368	24.0847	1	0.846891	73.4405
GOTERM_BP_DIRECT	GO:0071357~cellular response to type I interferon	2	0.628931	0.0801696	ENSSSCG00000012077, ENSSSCG00000010453	236	4	11368	24.0847	1	0.846891	73.4405
GOTERM_BP_DIRECT	GO:0006198~cAMP catabolic process	2	0.628931	0.0801696	ENSSSCG00000003805, ENSSSCG00000016929	236	4	11368	24.0847	1	0.846891	73.4405
KEGG_PATHWAY	ssc04630:Jak-STAT signaling pathway	7	2.20126	0.0824074	ENSSSCG00000015652, ENSSSCG00000029668, ENSSSCG00000016832, ENSSSCG00000027855, ENSSSCG00000001573, ENSSSCG00000009997, ENSSSCG00000000481	153	140	7030	2.29739	1	0.441313	65.1929
GOTERM_BP_DIRECT	GO:0010628~positive regulation of gene expression	6	1.88679	0.0849133	ENSSSCG00000014149, ENSSSCG00000004612, ENSSSCG00000016832, ENSSSCG00000030900, ENSSSCG00000017700, ENSSSCG00000015092	236	113	11368	2.55767	1	0.85777	75.5322
GOTERM_BP_DIRECT	GO:0009408~response to heat	3	0.943396	0.0872469	ENSSSCG00000004101, ENSSSCG00000001759, ENSSSCG00000009997	236	24	11368	6.02119	1	0.859793	76.5036
GOTERM_BP_DIRECT	GO:0002548~monocyte chemotaxis	3	0.943396	0.0872469	ENSSSCG00000017705, ENSSSCG00000017698, ENSSSCG00000017700	236	24	11368	6.02119	1	0.859793	76.5036
KEGG_PATHWAY	ssc05166:HTLV-I infection	10	3.14465	0.0916604	ENSSSCG00000015094, ENSSSCG00000015093, ENSSSCG00000003608, ENSSSCG00000029668, ENSSSCG00000022111, ENSSSCG00000015595, ENSSSCG00000015092, ENSSSCG00000015235, ENSSSCG00000028331, ENSSSCG00000000175	153	250	7030	1.83791	1	0.465632	69.2635
GOTERM_BP_DIRECT	GO:0006959~humoral immune response	4	1.25786	0.0963573	ENSSSCG00000014149, ENSSSCG00000009517, ENSSSCG00000000481, ENSSSCG00000012643	236	53	11368	3.63543	1	0.881876	79.9606
GOTERM_MF_DIRECT	GO:0005041~low-density lipoprotein receptor activity	2	0.628931	0.09653	ENSSSCG00000017920, ENSSSCG00000030900	223	5	11048	19.817	1	0.815045	73.5947
GOTERM_MF_DIRECT	GO:0004668~protein-arginine deiminase activity	2	0.628931	0.09653	ENSSSCG00000003483, ENSSSCG00000026478	223	5	11048	19.817	1	0.815045	73.5947
GOTERM_MF_DIRECT	GO:0005070~SH3/SH2 adaptor activity	2	0.628931	0.09653	ENSSSCG00000017527, ENSSSCG00000012643	223	5	11048	19.817	1	0.815045	73.5947
GOTERM_CC_DIRECT	GO:0042101~T cell receptor complex	2	0.628931	0.09837	ENSSSCG00000017527, ENSSSCG00000015093	264	5	12833	19.4439	1	0.834997	71.8681
KEGG_PATHWAY	ssc04145:Phagosome	7	2.20126	0.0985239	ENSSSCG00000015405, ENSSSCG00000014369, ENSSSCG00000026022, ENSSSCG00000025173, ENSSSCG00000025593, ENSSSCG00000017300, ENSSSCG00000020893	153	147	7030	2.18799	1	0.478979	71.9952
GOTERM_BP_DIRECT	GO:0043367~CD4-positive, alpha-beta T cell differentiation	2	0.628931	0.0991911	ENSSSCG00000008648, ENSSSCG00000011201	236	5	11368	19.2678	1	0.884466	80.9347
GOTERM_BP_DIRECT	GO:0051045~negative regulation of membrane protein ectodomain proteolysis	2	0.628931	0.0991911	ENSSSCG00000012277, ENSSSCG00000015652	236	5	11368	19.2678	1	0.884466	80.9347
GOTERM_BP_DIRECT	GO:0045954~positive regulation of natural killer cell mediated cytotoxicity	2	0.628931	0.0991911	ENSSSCG00000000641, ENSSSCG00000012643	236	5	11368	19.2678	1	0.884466	80.9347
GOTERM_BP_DIRECT	GO:0010944~negative regulation of transcription by competitive promoter binding	2	0.628931	0.0991911	ENSSSCG00000004507, ENSSSCG00000028552	236	5	11368	19.2678	1	0.884466	80.9347
GOTERM_BP_DIRECT	GO:1901216~positive regulation of neuron death	2	0.628931	0.0991911	ENSSSCG00000001509, ENSSSCG00000009668	236	5	11368	19.2678	1	0.884466	80.9347
GOTERM_BP_DIRECT	GO:0002485~antigen processing and presentation of endogenous peptide antigen via MHC class I via ER pathway, TAP-dependent	2	0.628931	0.0991911	ENSSSCG00000025173, ENSSSCG00000020893	236	5	11368	19.2678	1	0.884466	80.9347
GOTERM_BP_DIRECT	GO:0002481~antigen processing and presentation of exogenous protein antigen via MHC class Ib, TAP-dependent	2	0.628931	0.0991911	ENSSSCG00000025173, ENSSSCG00000020893	236	5	11368	19.2678	1	0.884466	80.9347
GOTERM_BP_DIRECT	GO:0002591~positive regulation of antigen processing and presentation of peptide antigen via MHC class I	2	0.628931	0.0991911	ENSSSCG00000025173, ENSSSCG00000020893	236	5	11368	19.2678	1	0.884466	80.9347
GOTERM_BP_DIRECT	GO:0070234~positive regulation of T cell apoptotic process	2	0.628931	0.0991911	ENSSSCG00000005211, ENSSSCG00000017705	236	5	11368	19.2678	1	0.884466	80.9347
GOTERM_BP_DIRECT	GO:0045348~positive regulation of MHC class II biosynthetic process	2	0.628931	0.0991911	ENSSSCG00000015652, ENSSSCG00000000481	236	5	11368	19.2678	1	0.884466	80.9347
GOTERM_BP_DIRECT	GO:1900006~positive regulation of dendrite development	2	0.628931	0.0991911	ENSSSCG00000005229, ENSSSCG00000021206	236	5	11368	19.2678	1	0.884466	80.9347
GOTERM_BP_DIRECT	GO:0002467~germinal center formation	2	0.628931	0.0991911	ENSSSCG00000014149, ENSSSCG00000027426	236	5	11368	19.2678	1	0.884466	80.9347
GOTERM_BP_DIRECT	GO:0002489~antigen processing and presentation of endogenous peptide antigen via MHC class Ib via ER pathway, TAP-dependent	2	0.628931	0.0991911	ENSSSCG00000025173, ENSSSCG00000020893	236	5	11368	19.2678	1	0.884466	80.9347
